# Supplementary material
Source: PubMed Central journal article supplement (PMC5034582)
Supplement: NIHMS814646-supplement-Supllementary_info.pdf [file NIHMS814646-supplement-Supllementary_info.pdf]

Supplementary Figure 1a. Amino Acid Highliter Plot of 701

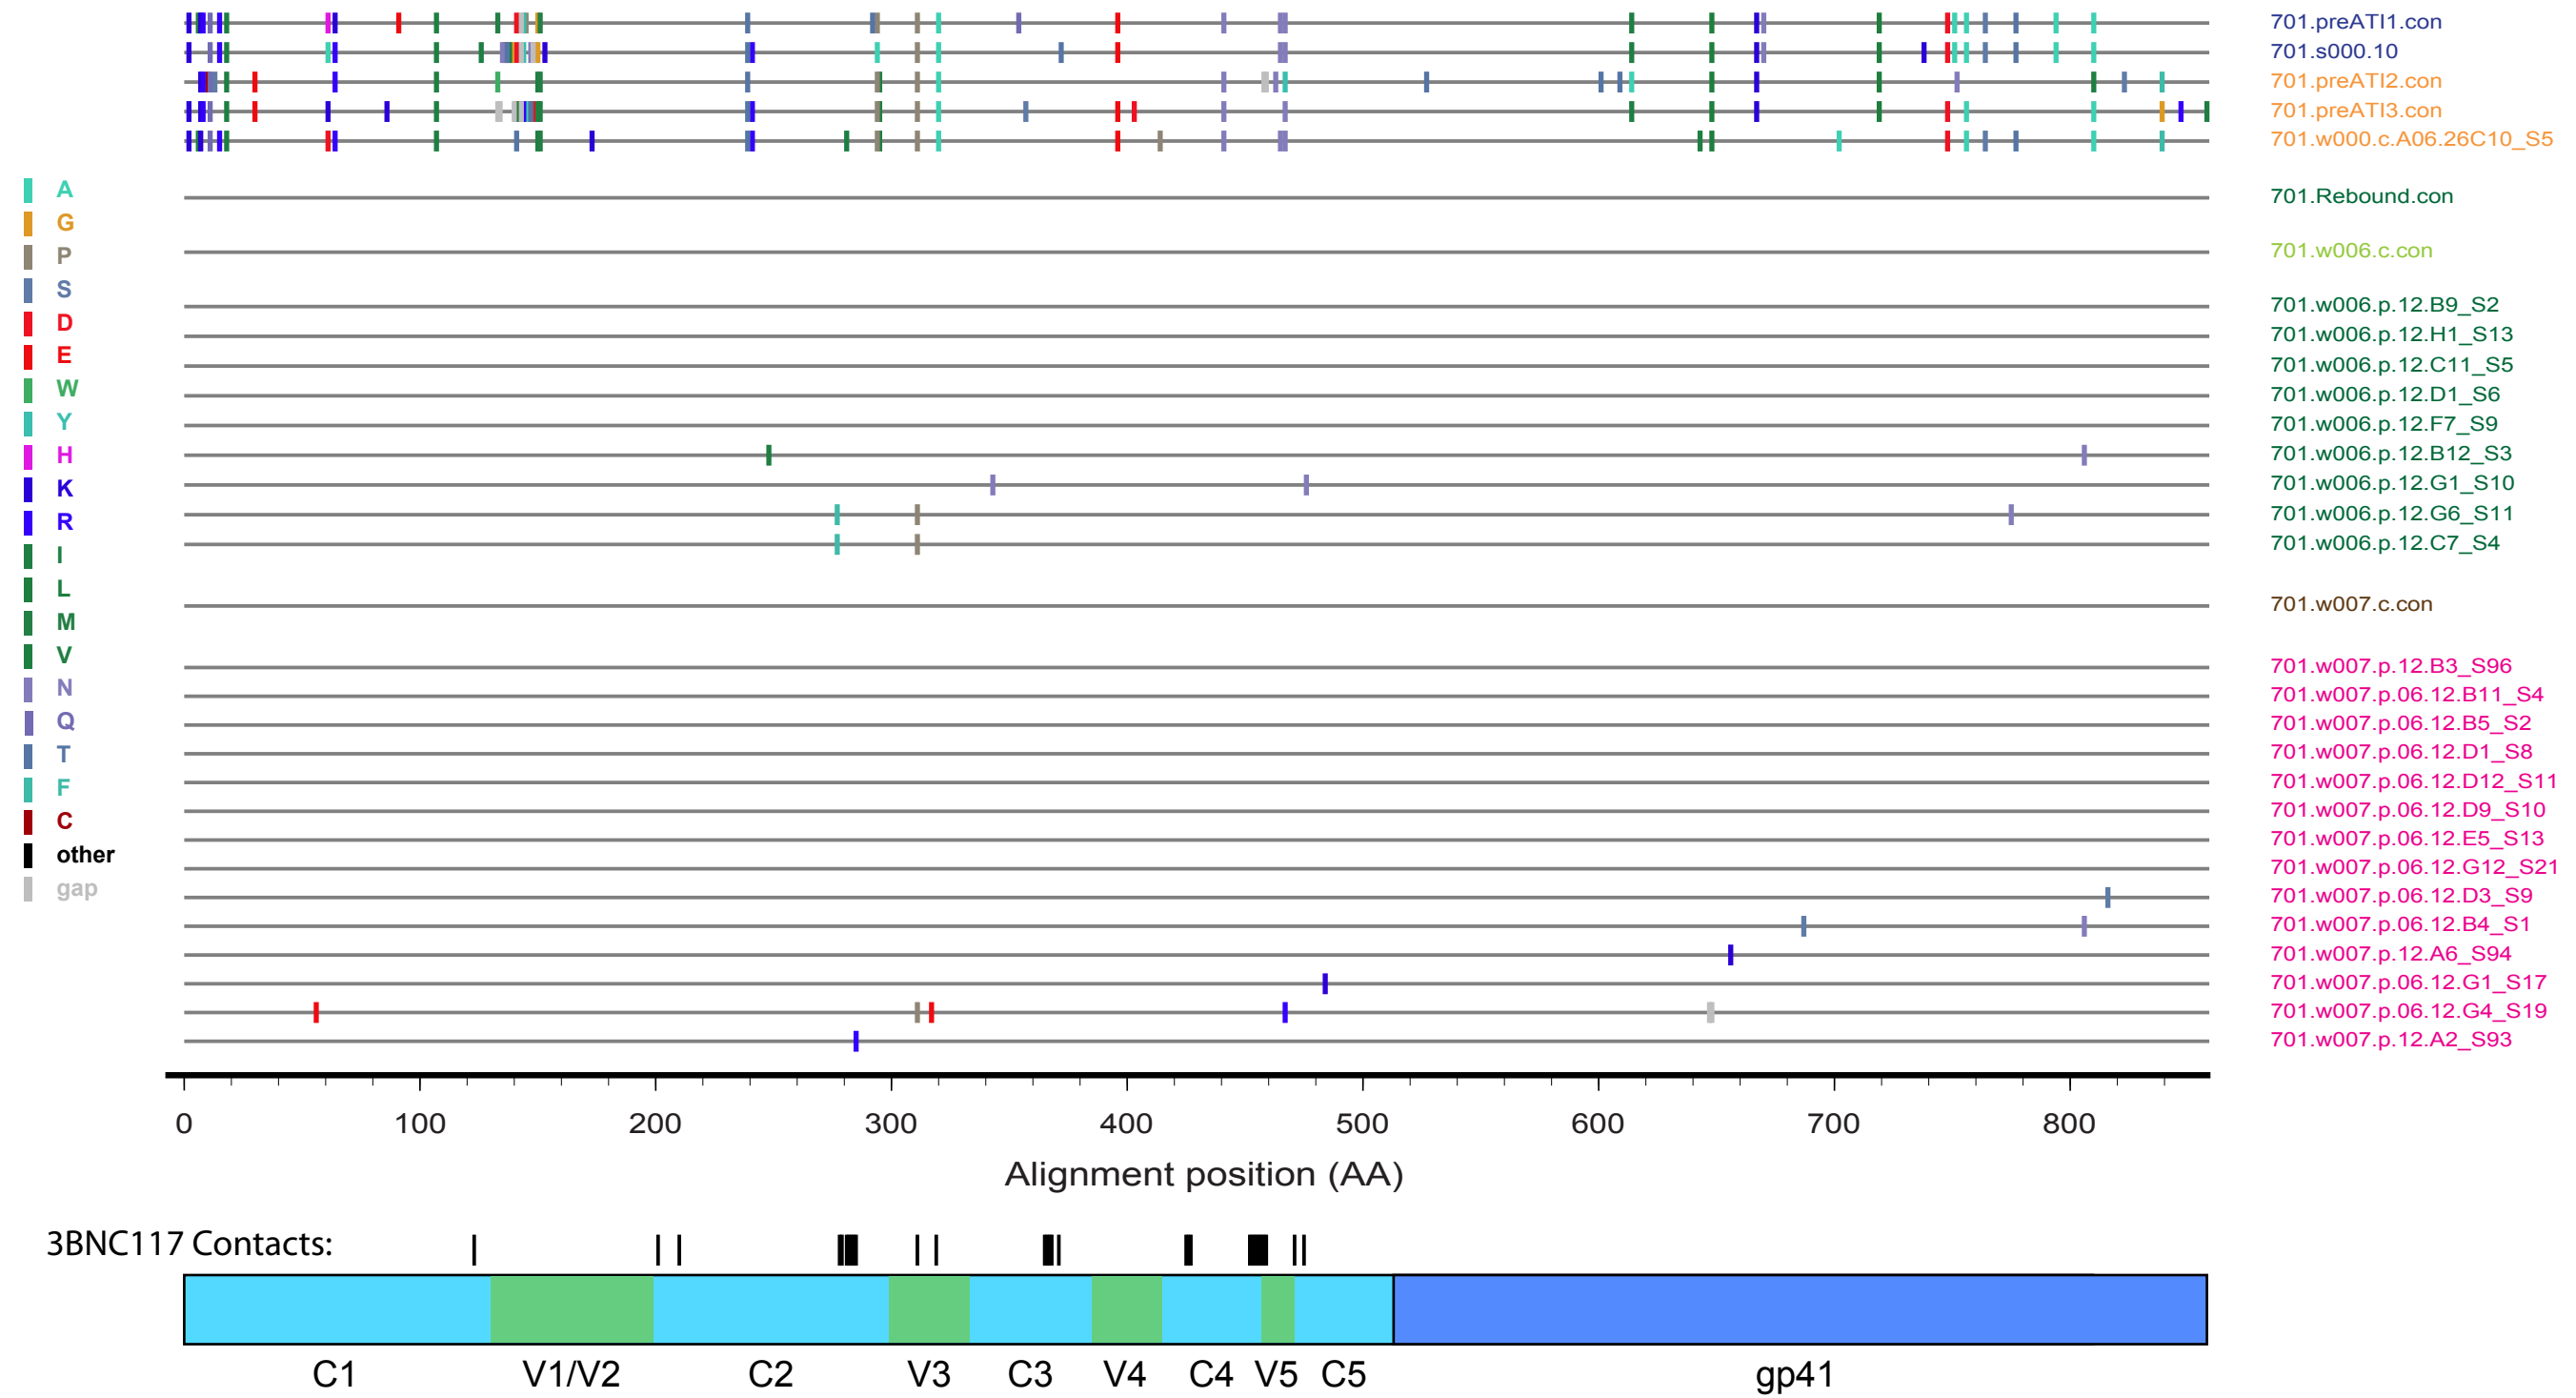

Supplementary Figure 1b. Amino Acid Highlighter Plot of 702

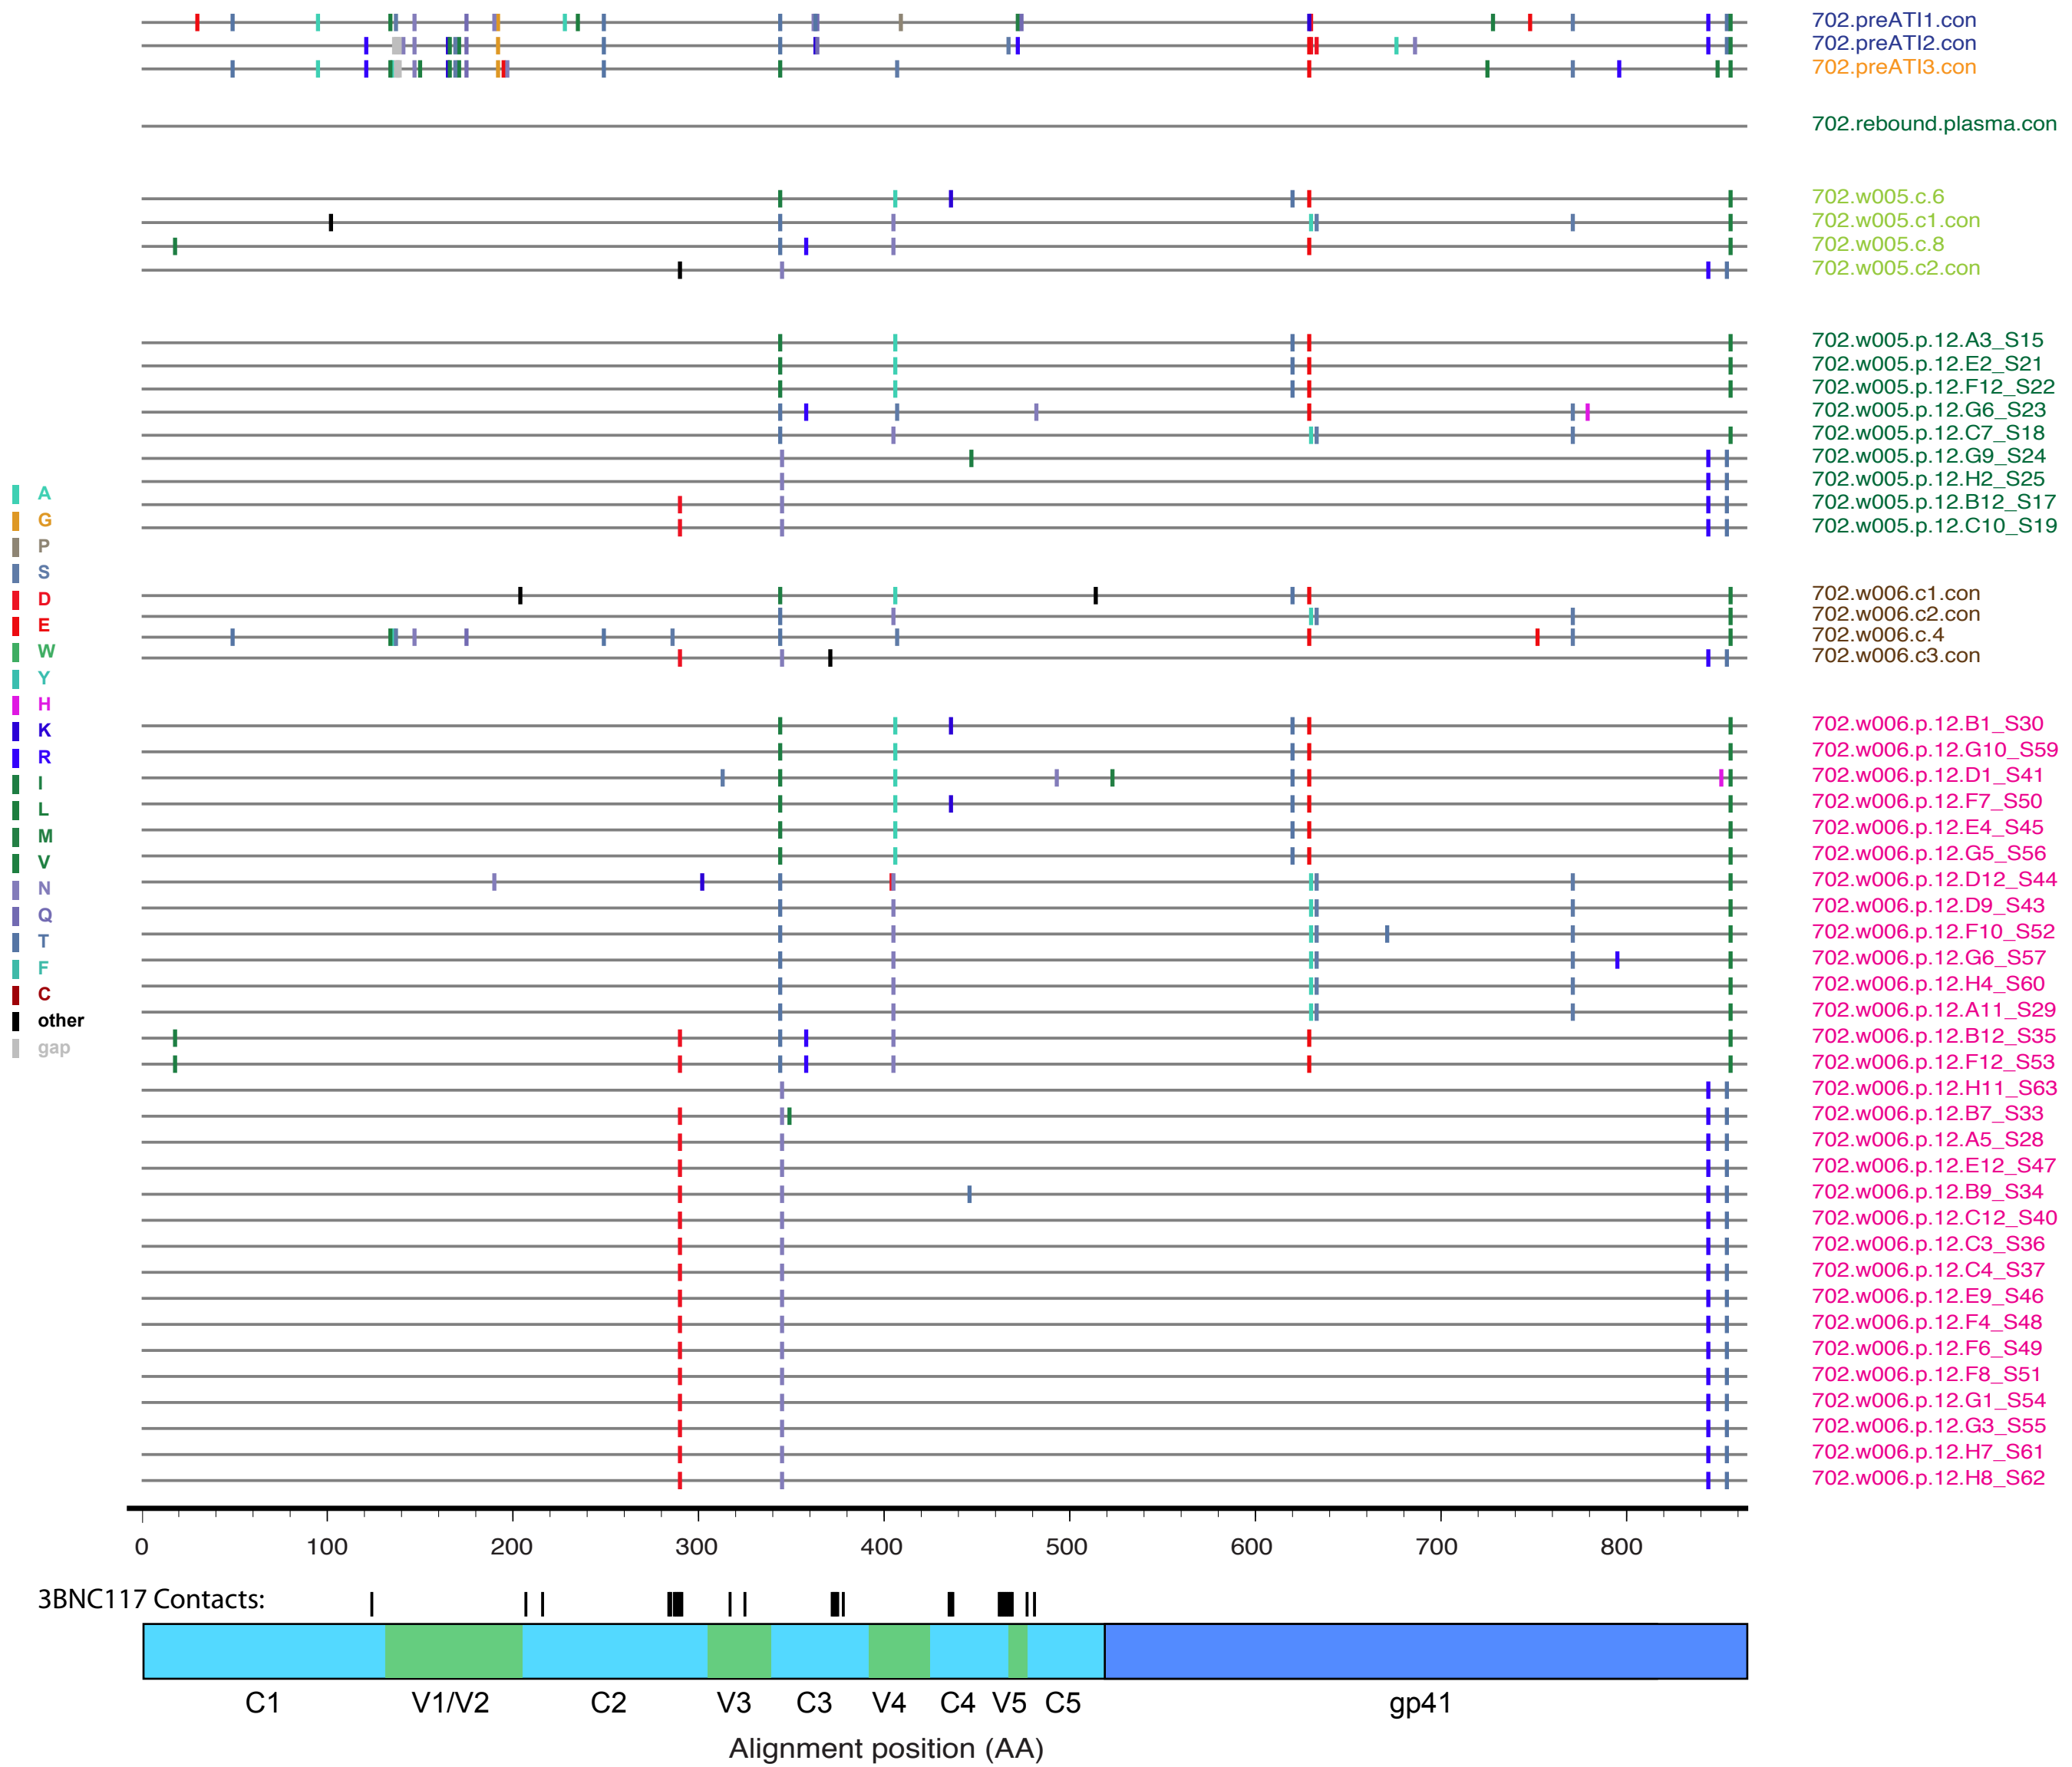



Supplementary Figure 1c. Amino Acid Highlighter Plot of 703

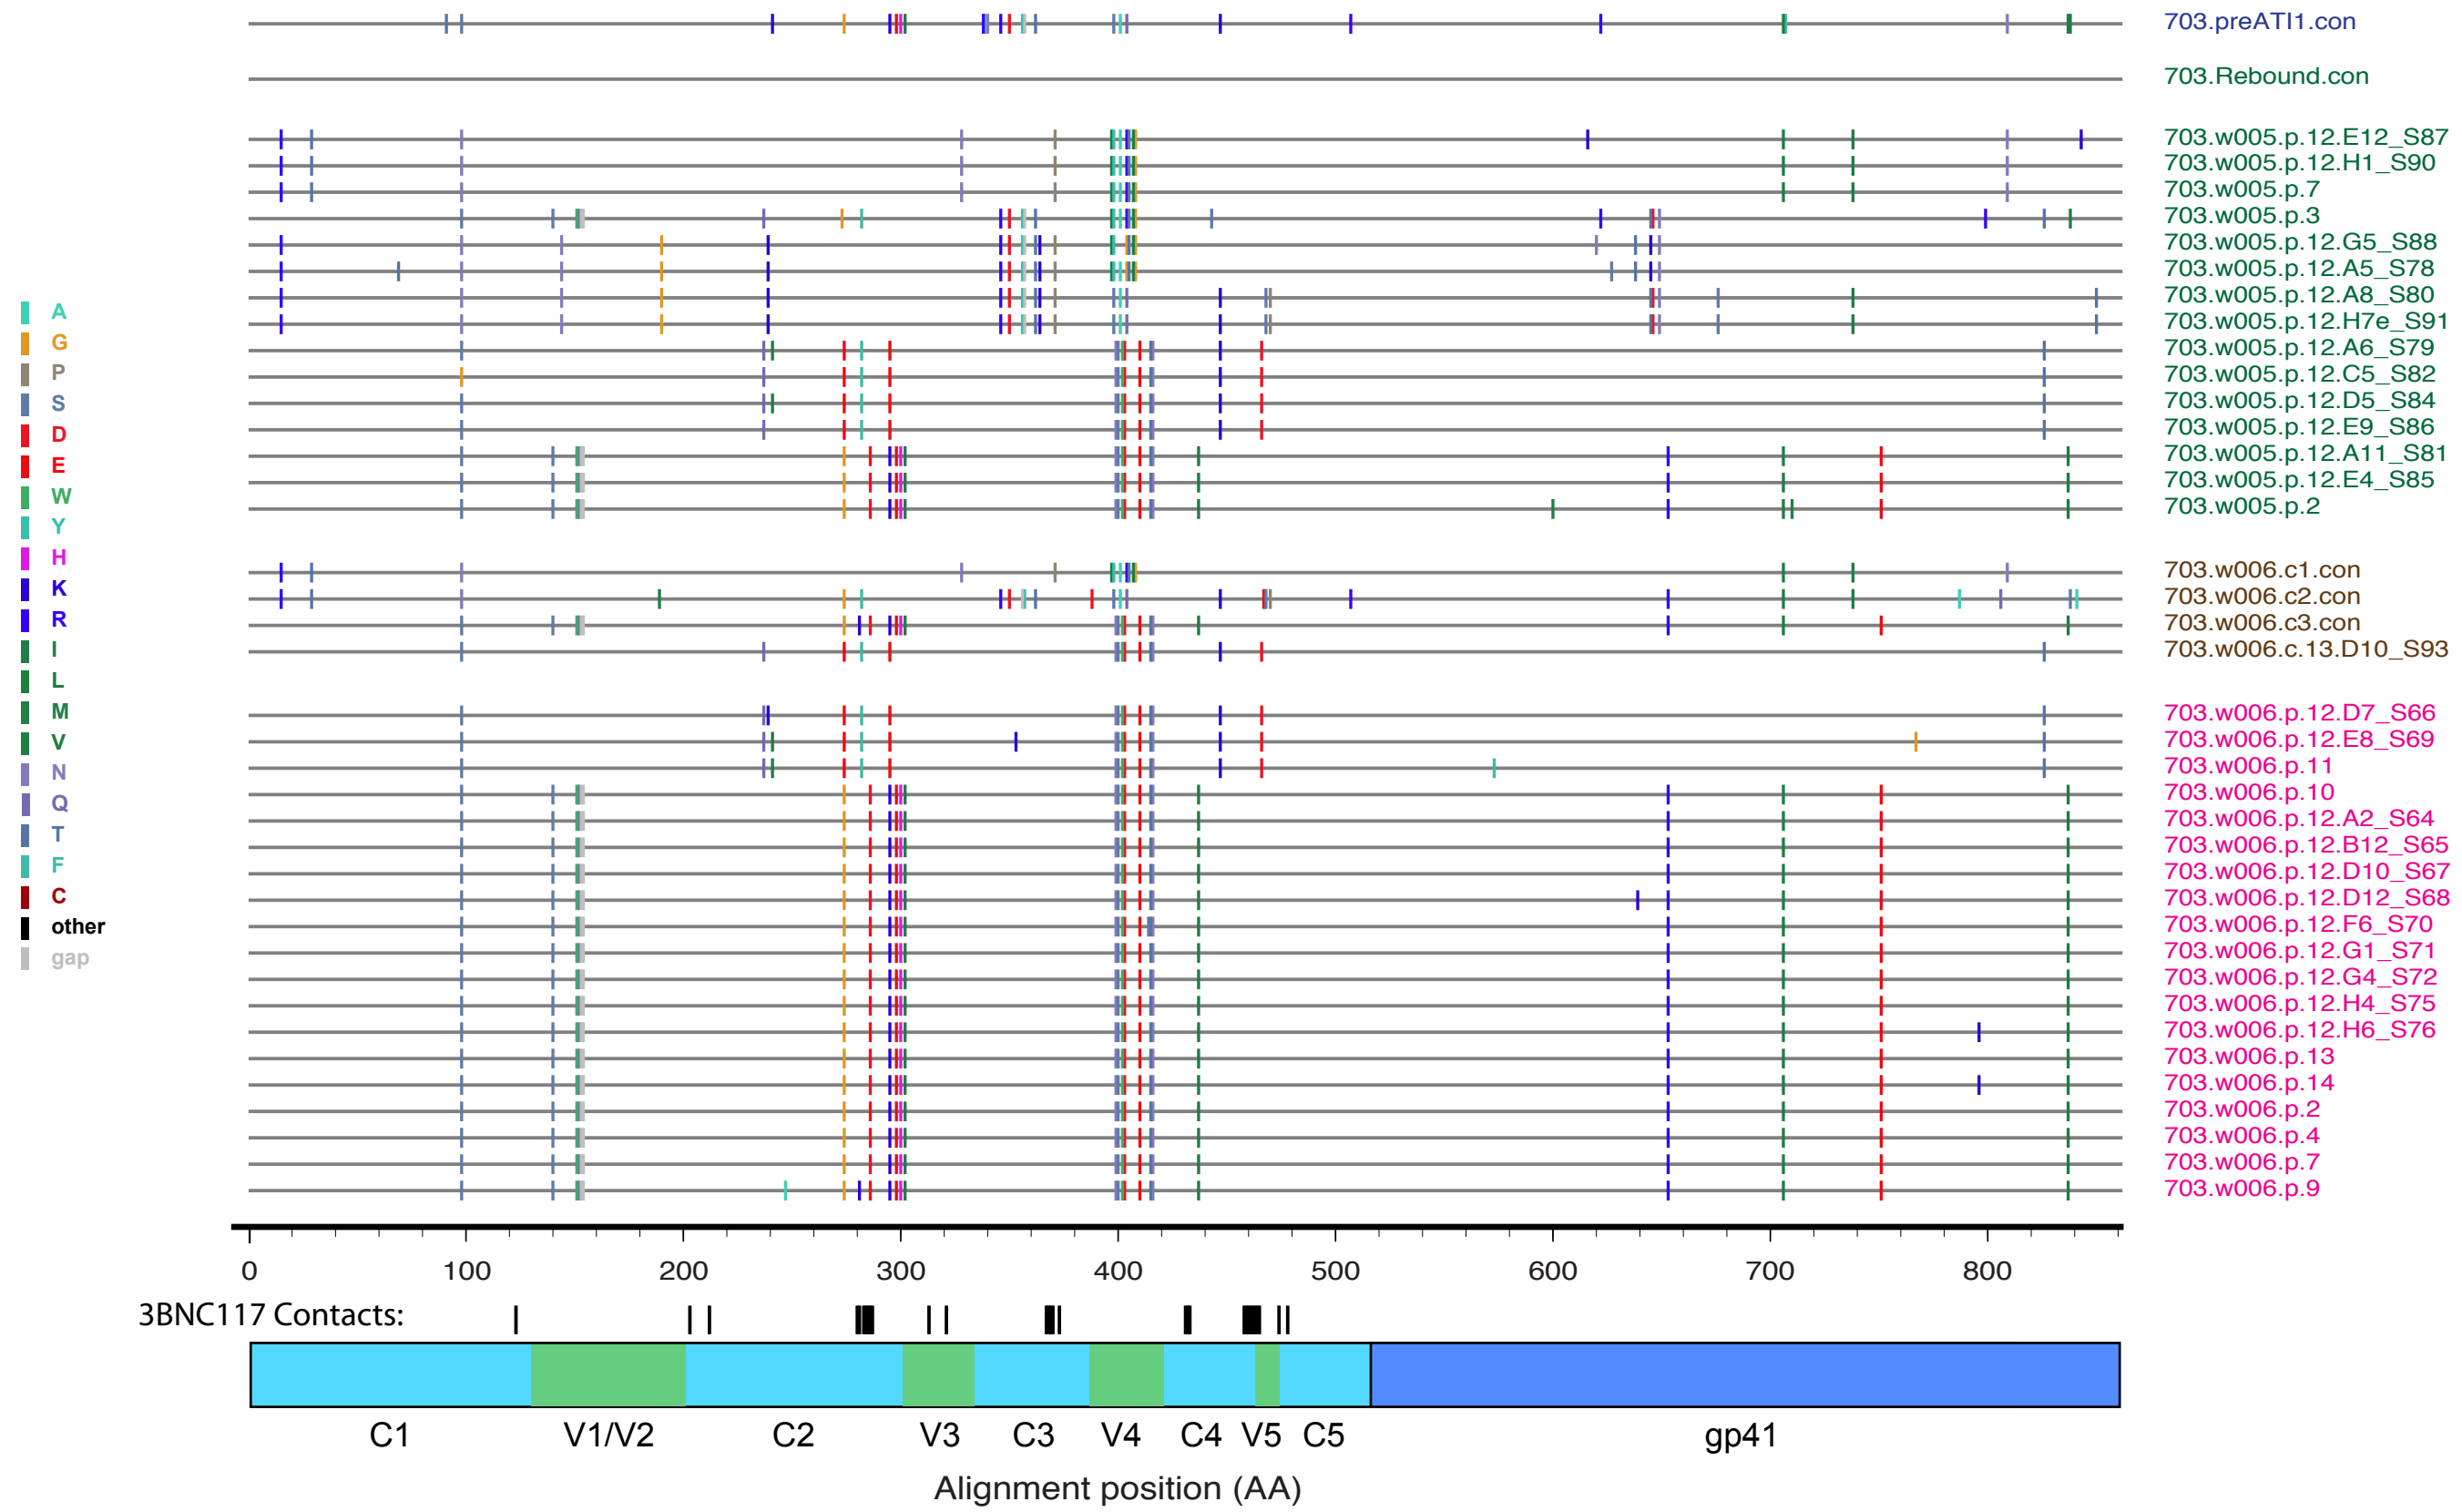

Supplementary Figure 1d. Amino Acid Highlighter Plot of 704

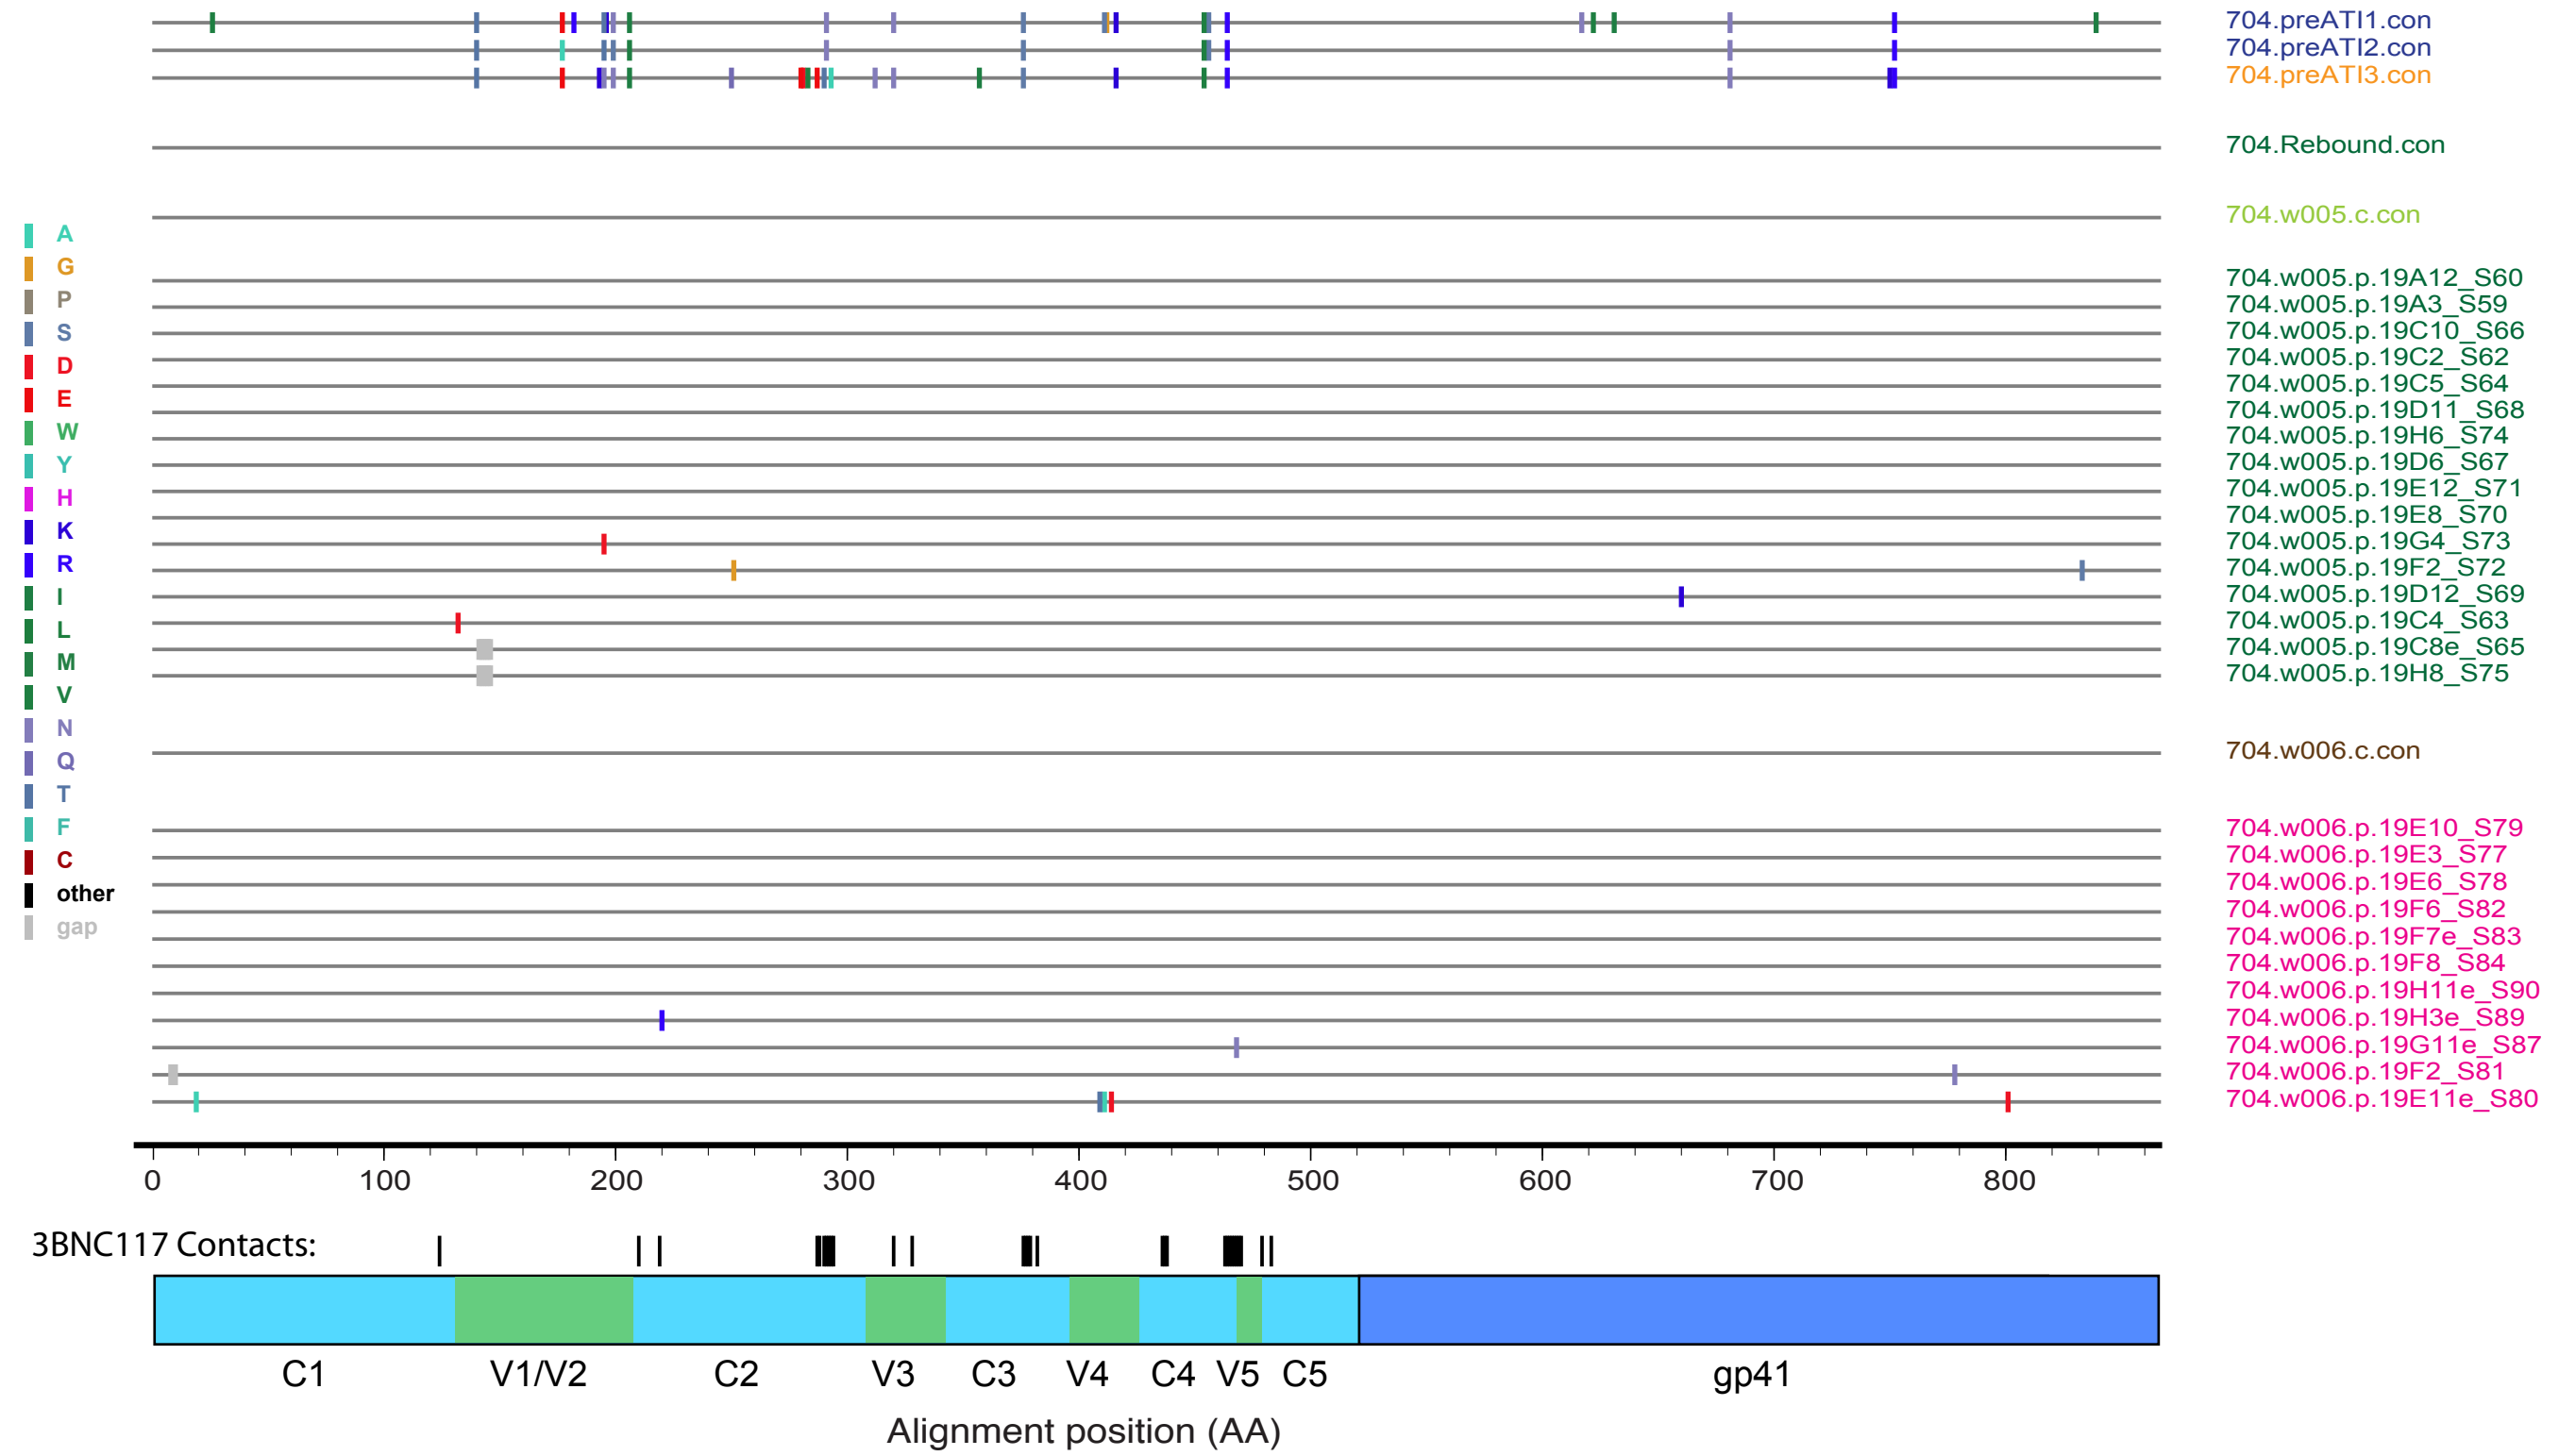

Supplementary Figure 1e. Amino Acid Highlighter Plot of 707

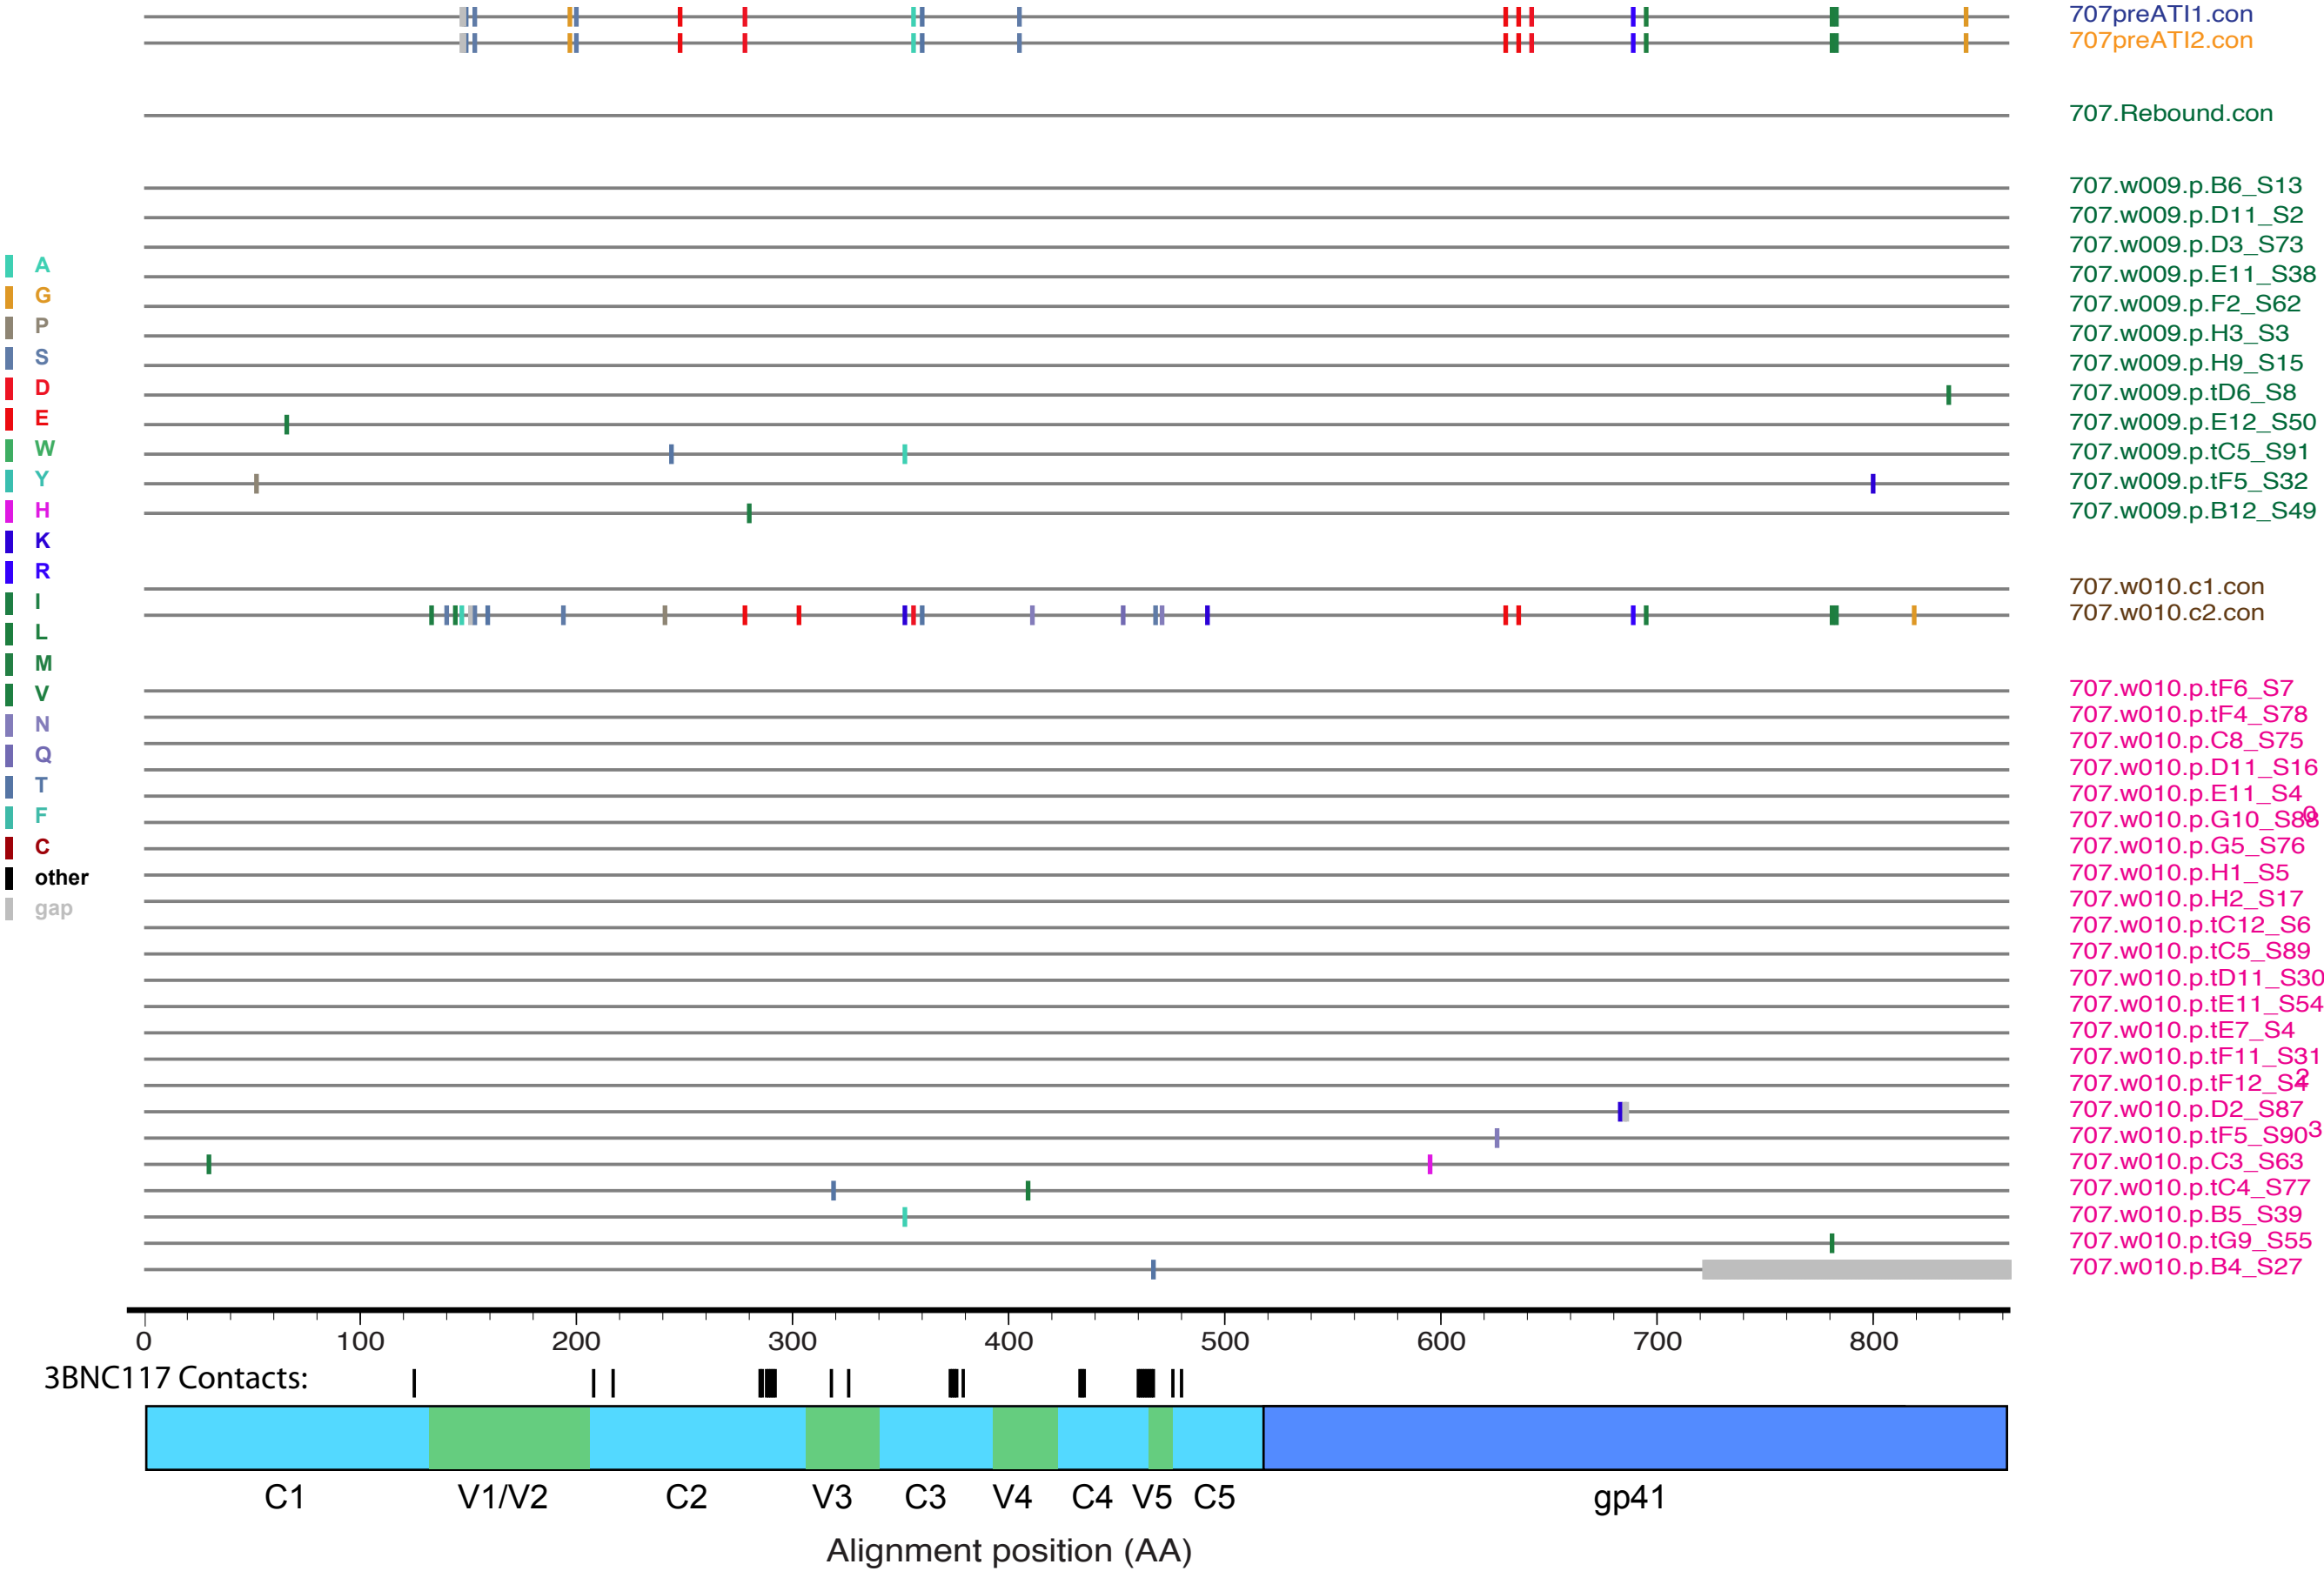

Supplementary Figure 1f. Amino Acid Highlighter Plot of 708

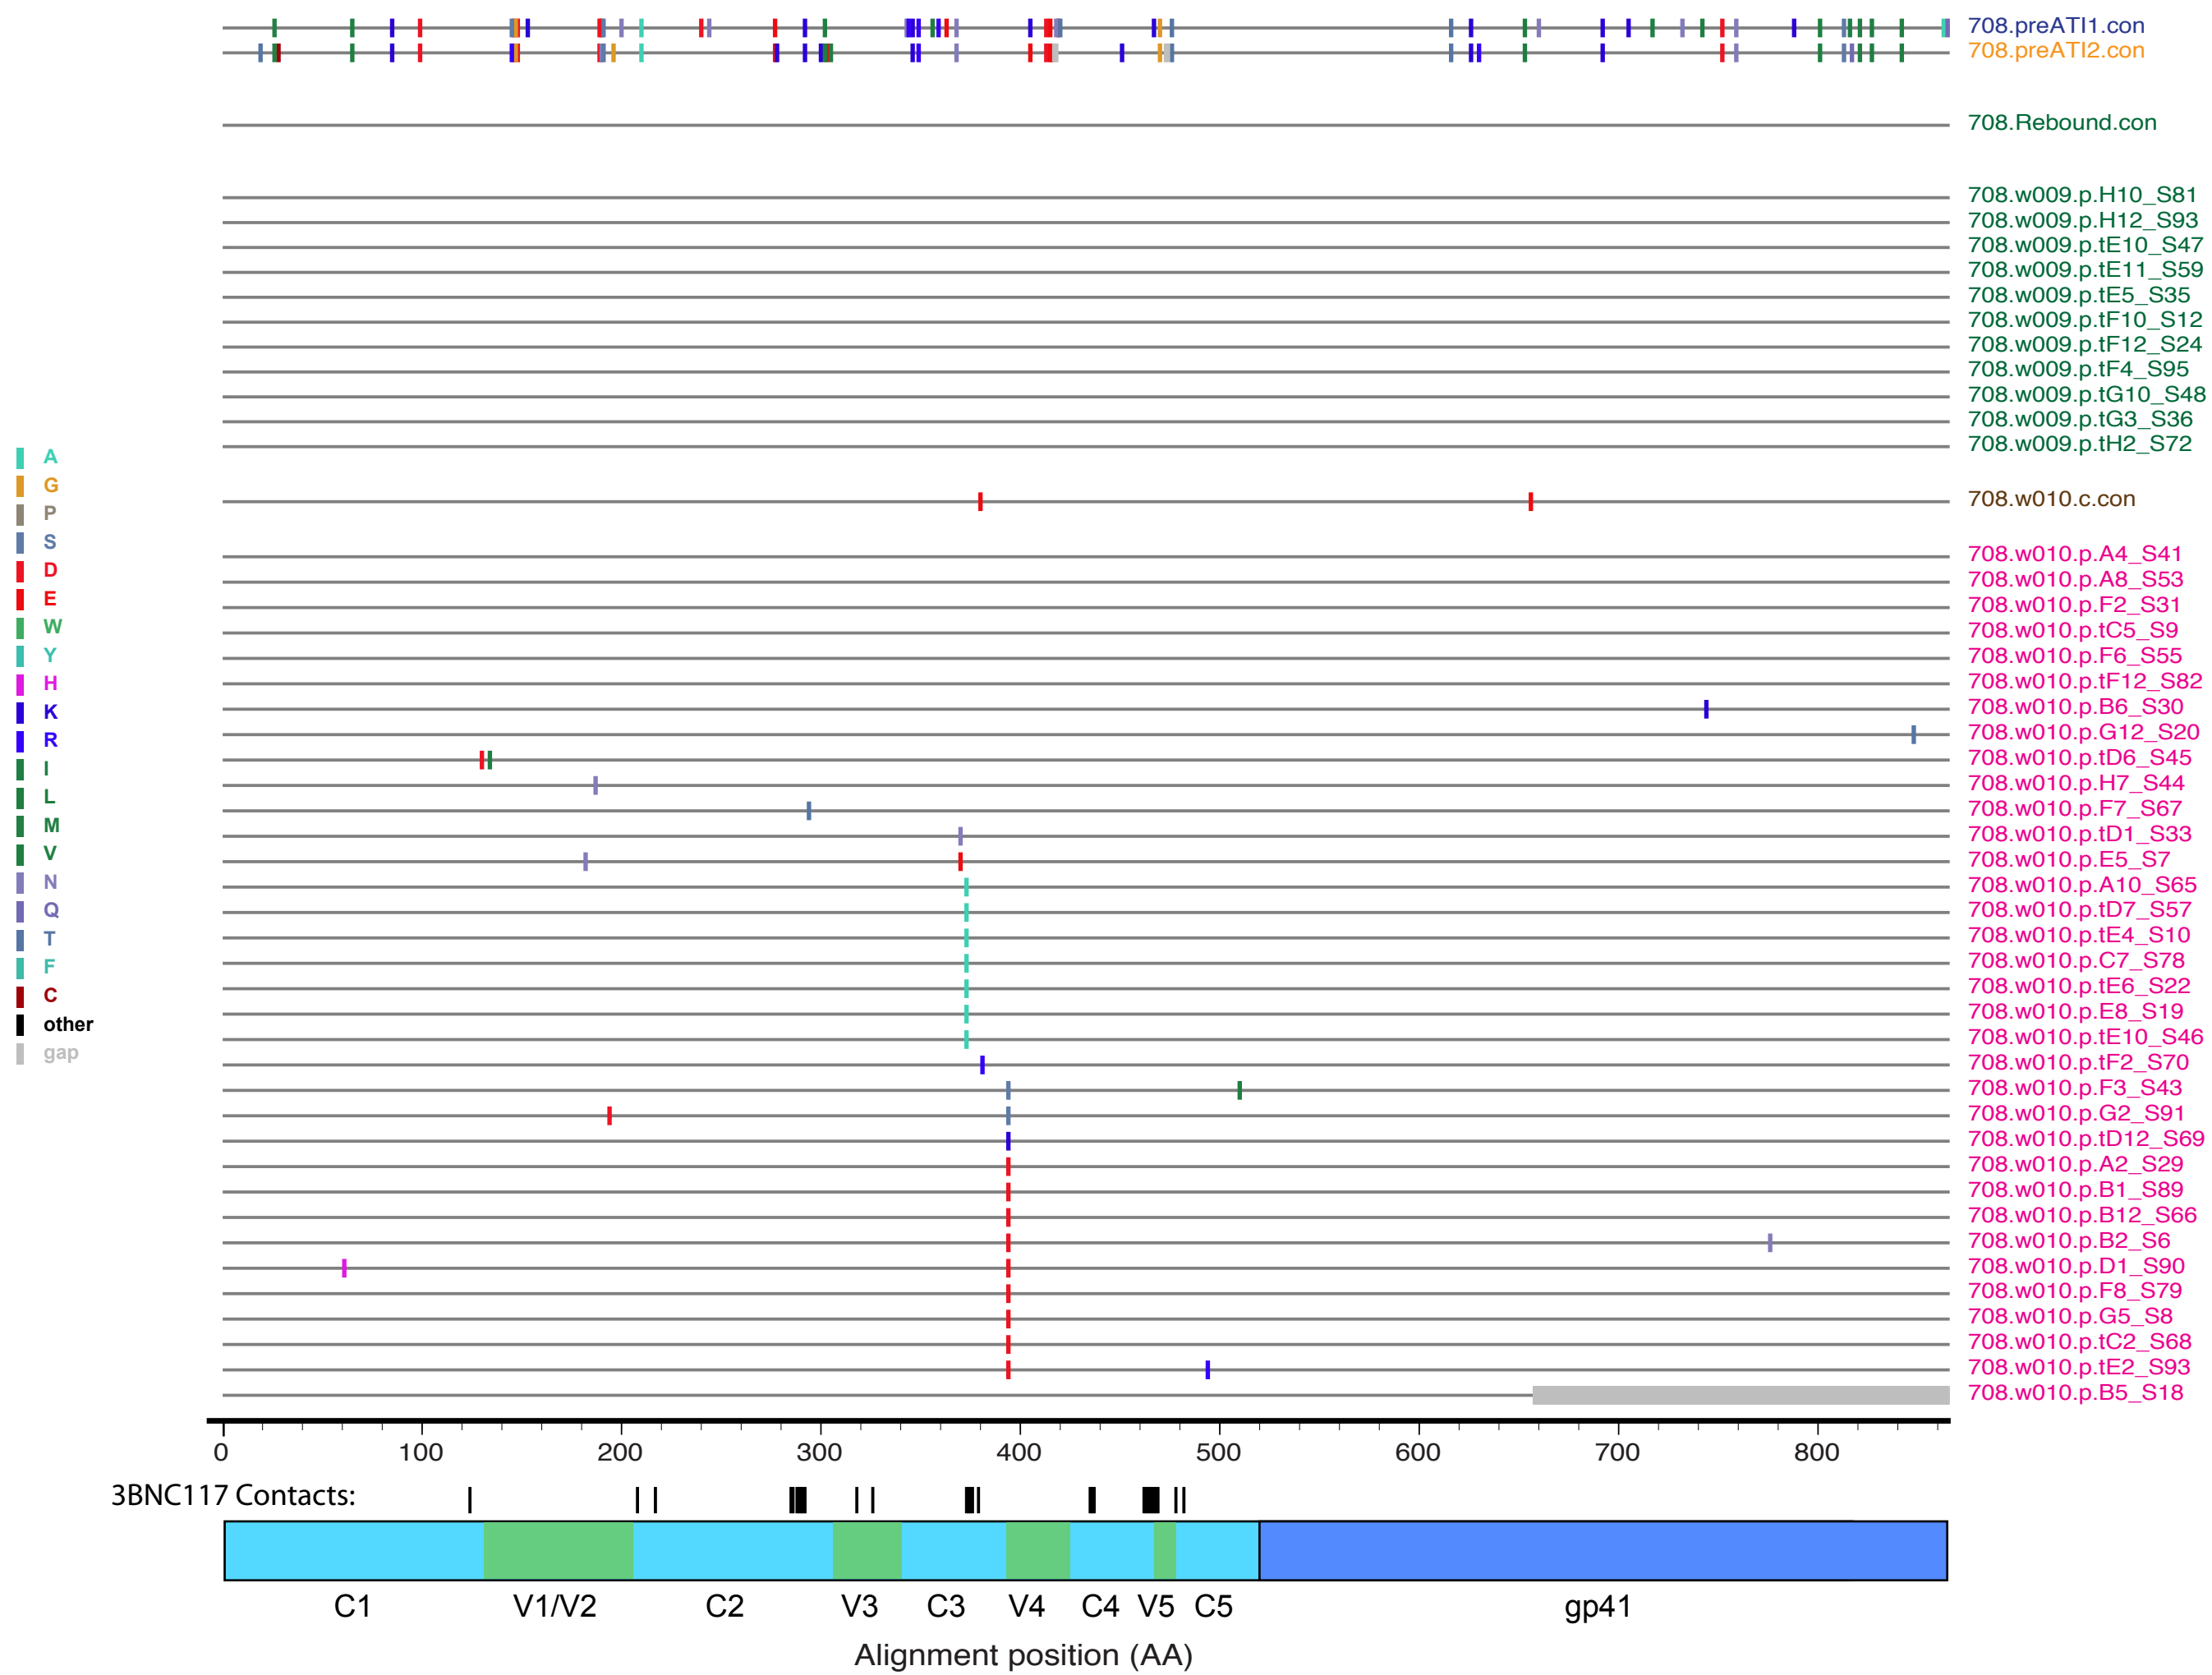

Supplementary Figure 1g. Amino Acid Highliter Plot of 709

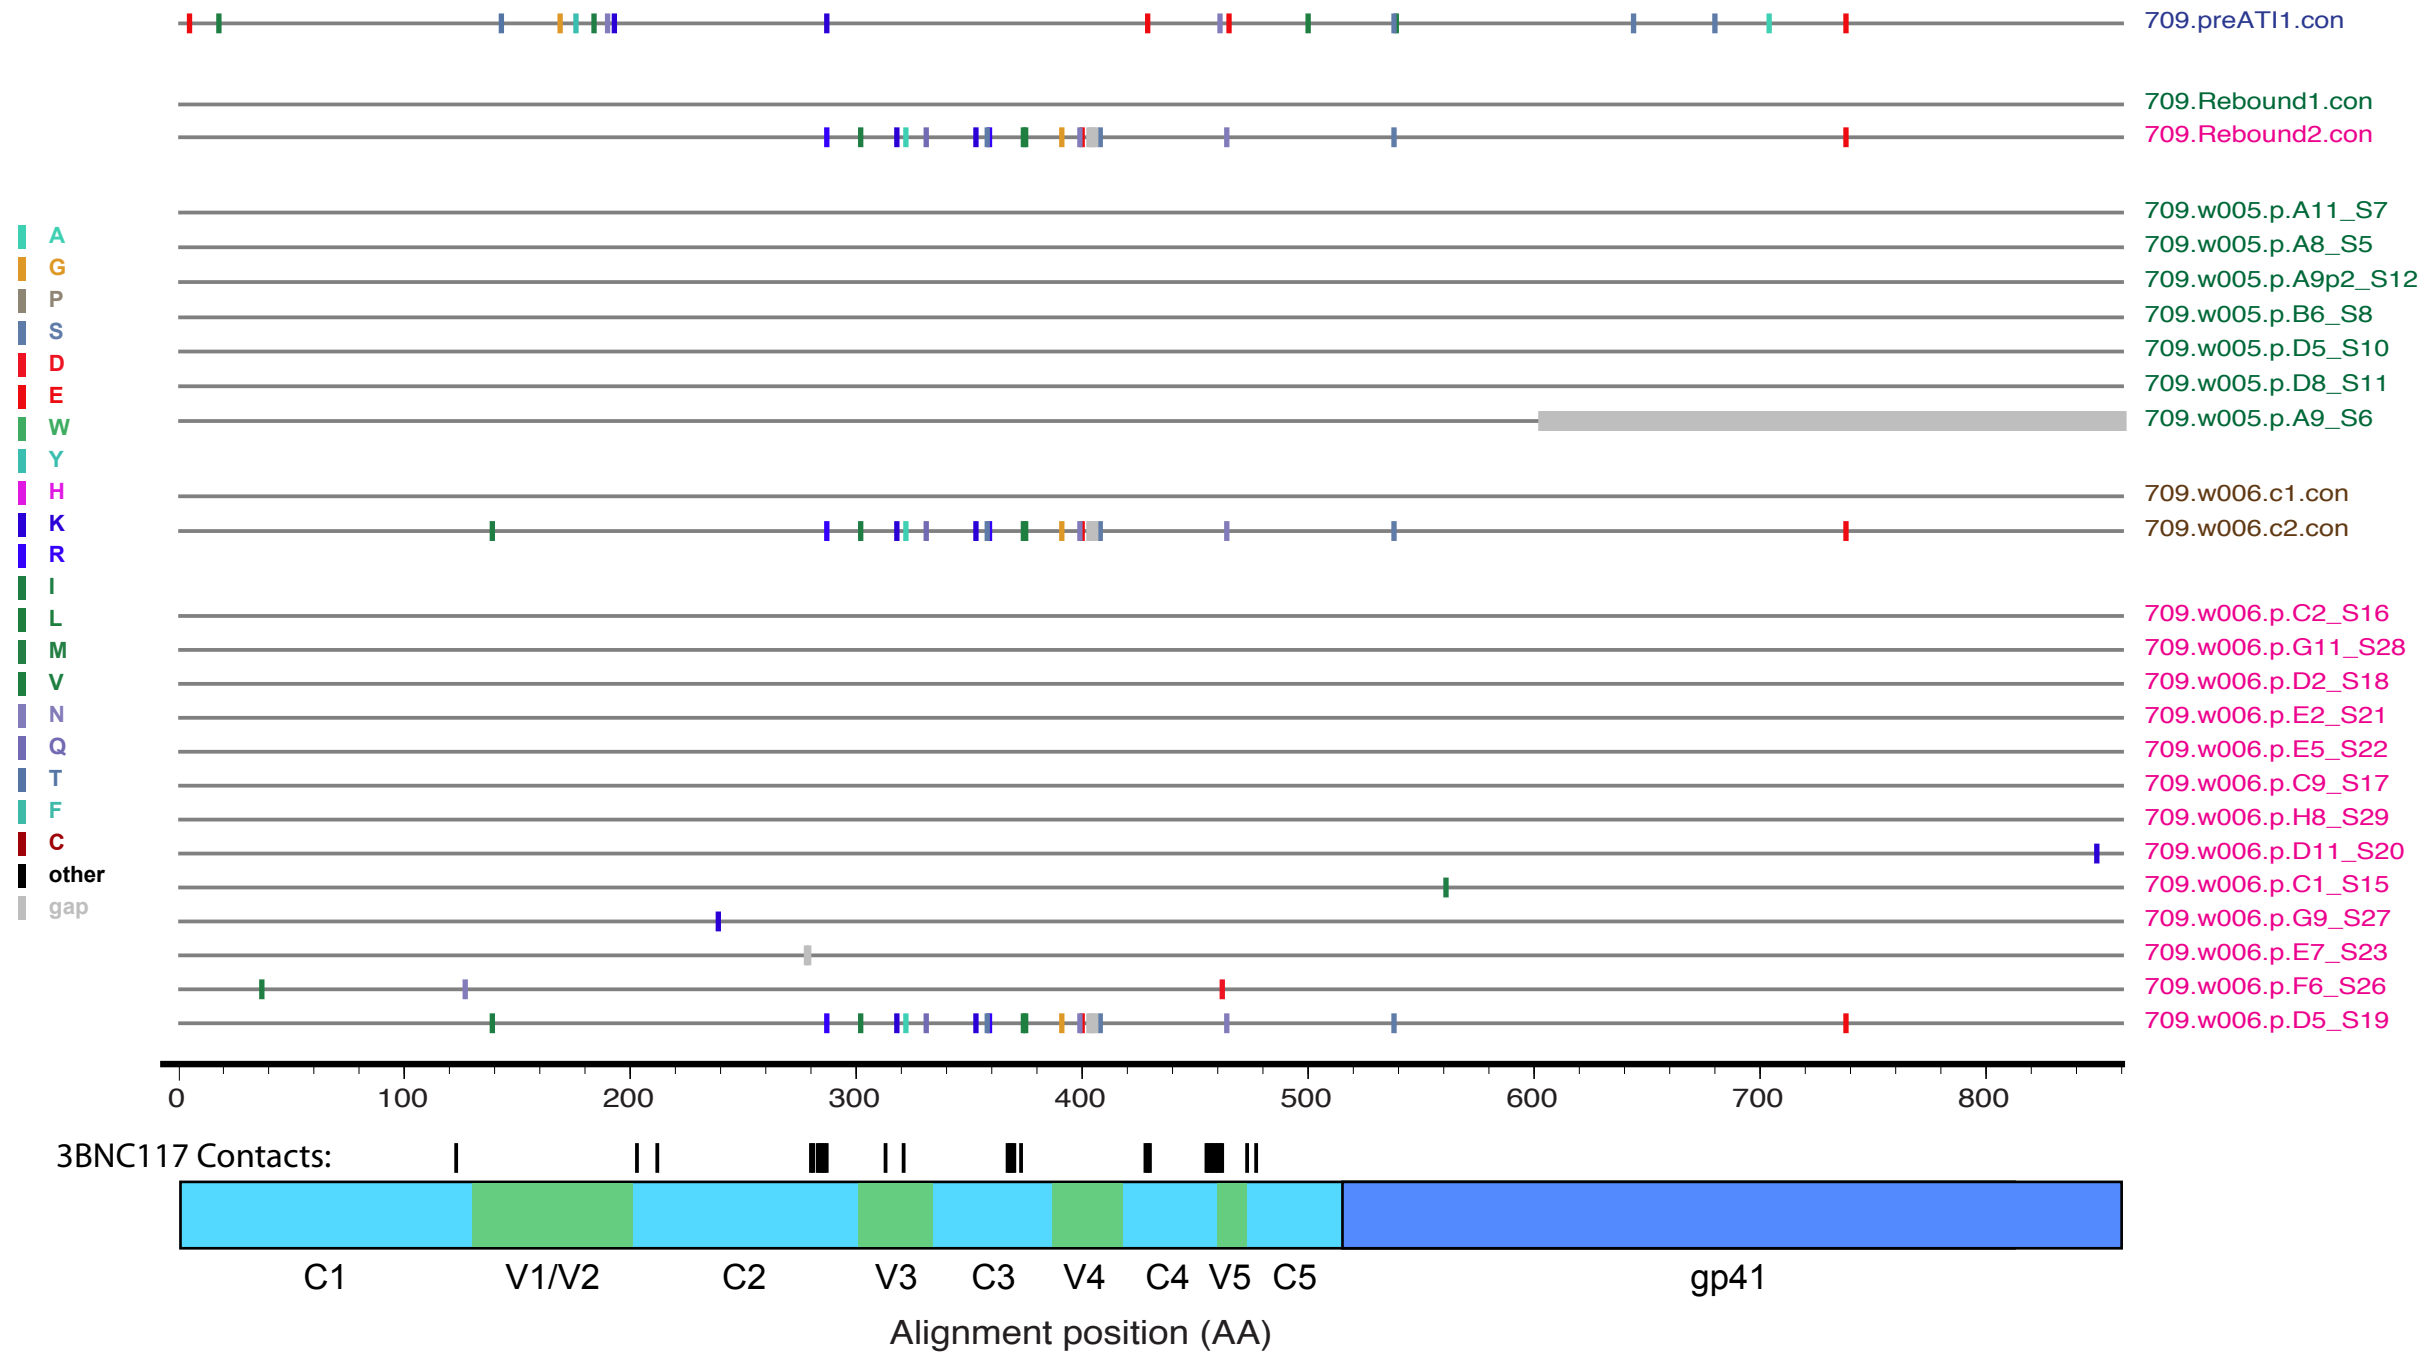

## Supplementary Figure 1h. Amino Acid Highlighter Plot of 711

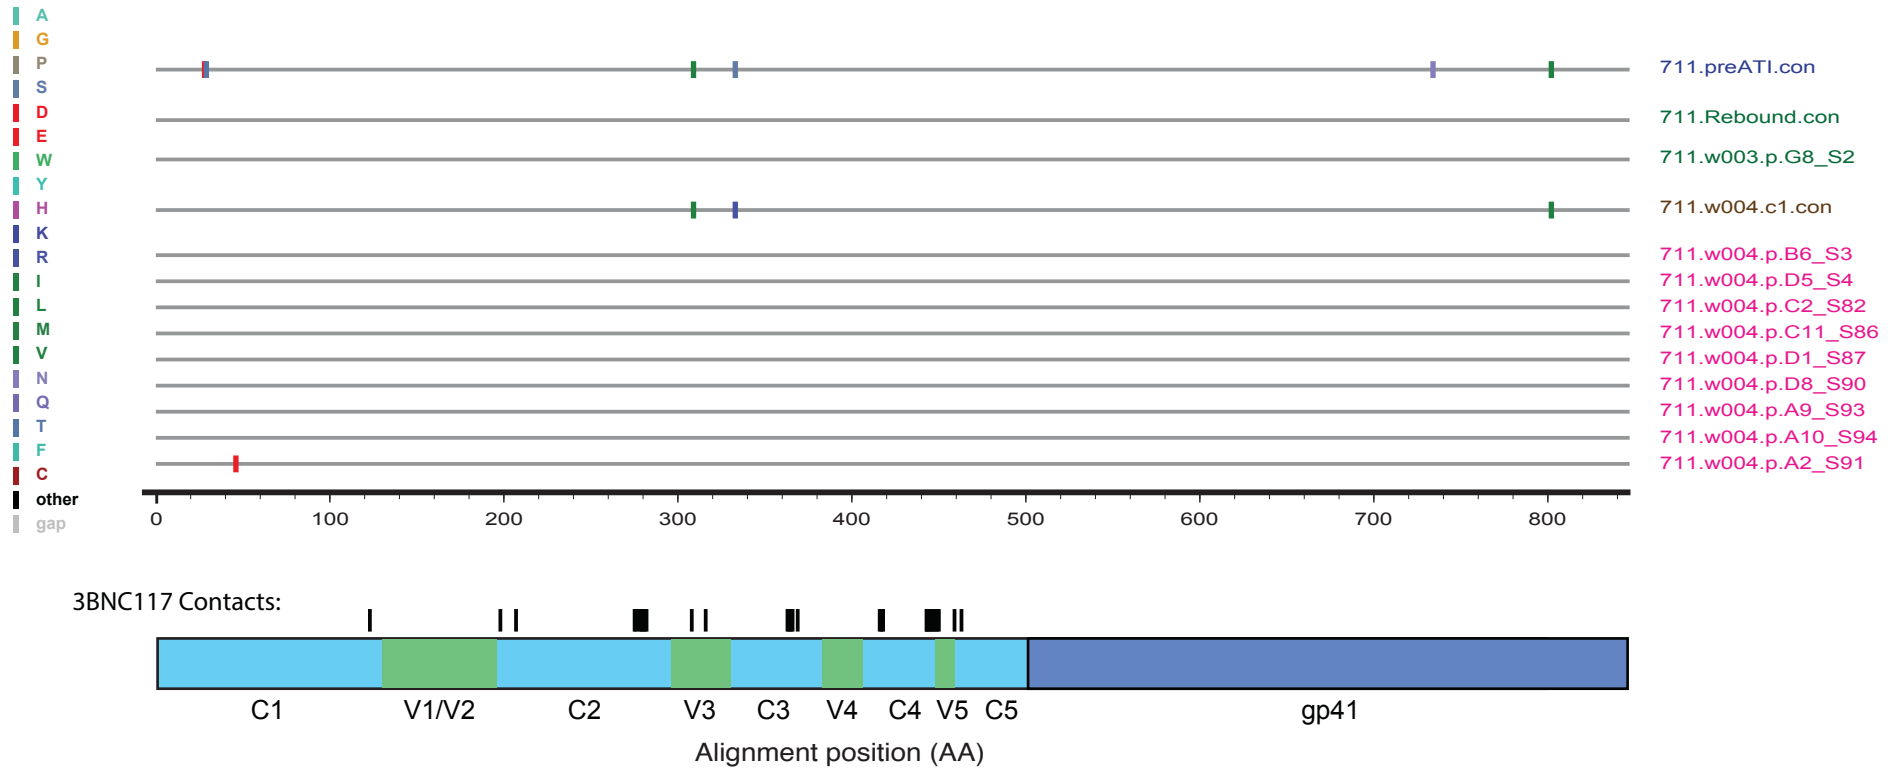

### Supplementary Figure 1. Amino acid highlighter plots

([http://www.hiv.lanl.gov/content/sequence/HIGHLIGHT/highlighter\\_top.html](http://www.hiv.lanl.gov/content/sequence/HIGHLIGHT/highlighter_top.html)) are shown for all env genes analyzed in Fig. 3. Sequences are represented as horizontal lines with tick marks indicating amino acid changes (color coded) relative to the first rebound plasma derived Env protein consensus sequence. Gp160 landmarks are shown at the bottom, with 3BNC117 contacts depicted above in black tick marks. Numbering at the bottom corresponds to the alignment position. Pre-ATI sequences are shown above the rebound master sequence. Plasma and culture derived consensus sequences from rebound time points are shown below. In participants 702 and 703, an aspartate at HXB2 position 281 (alignment positions 290 and 286, respectively) was selected in the plasma rebound sequences. In other participants, sporadic mutations within 3BNC117 contacts are observed during rebound. In 708, selection in the C3-V4 region (outside of 3BNC117 contacts) is observed at the second rebound time point.



Supplementary Figure 2a continued. 701, All GP120 Single Genome Sequences

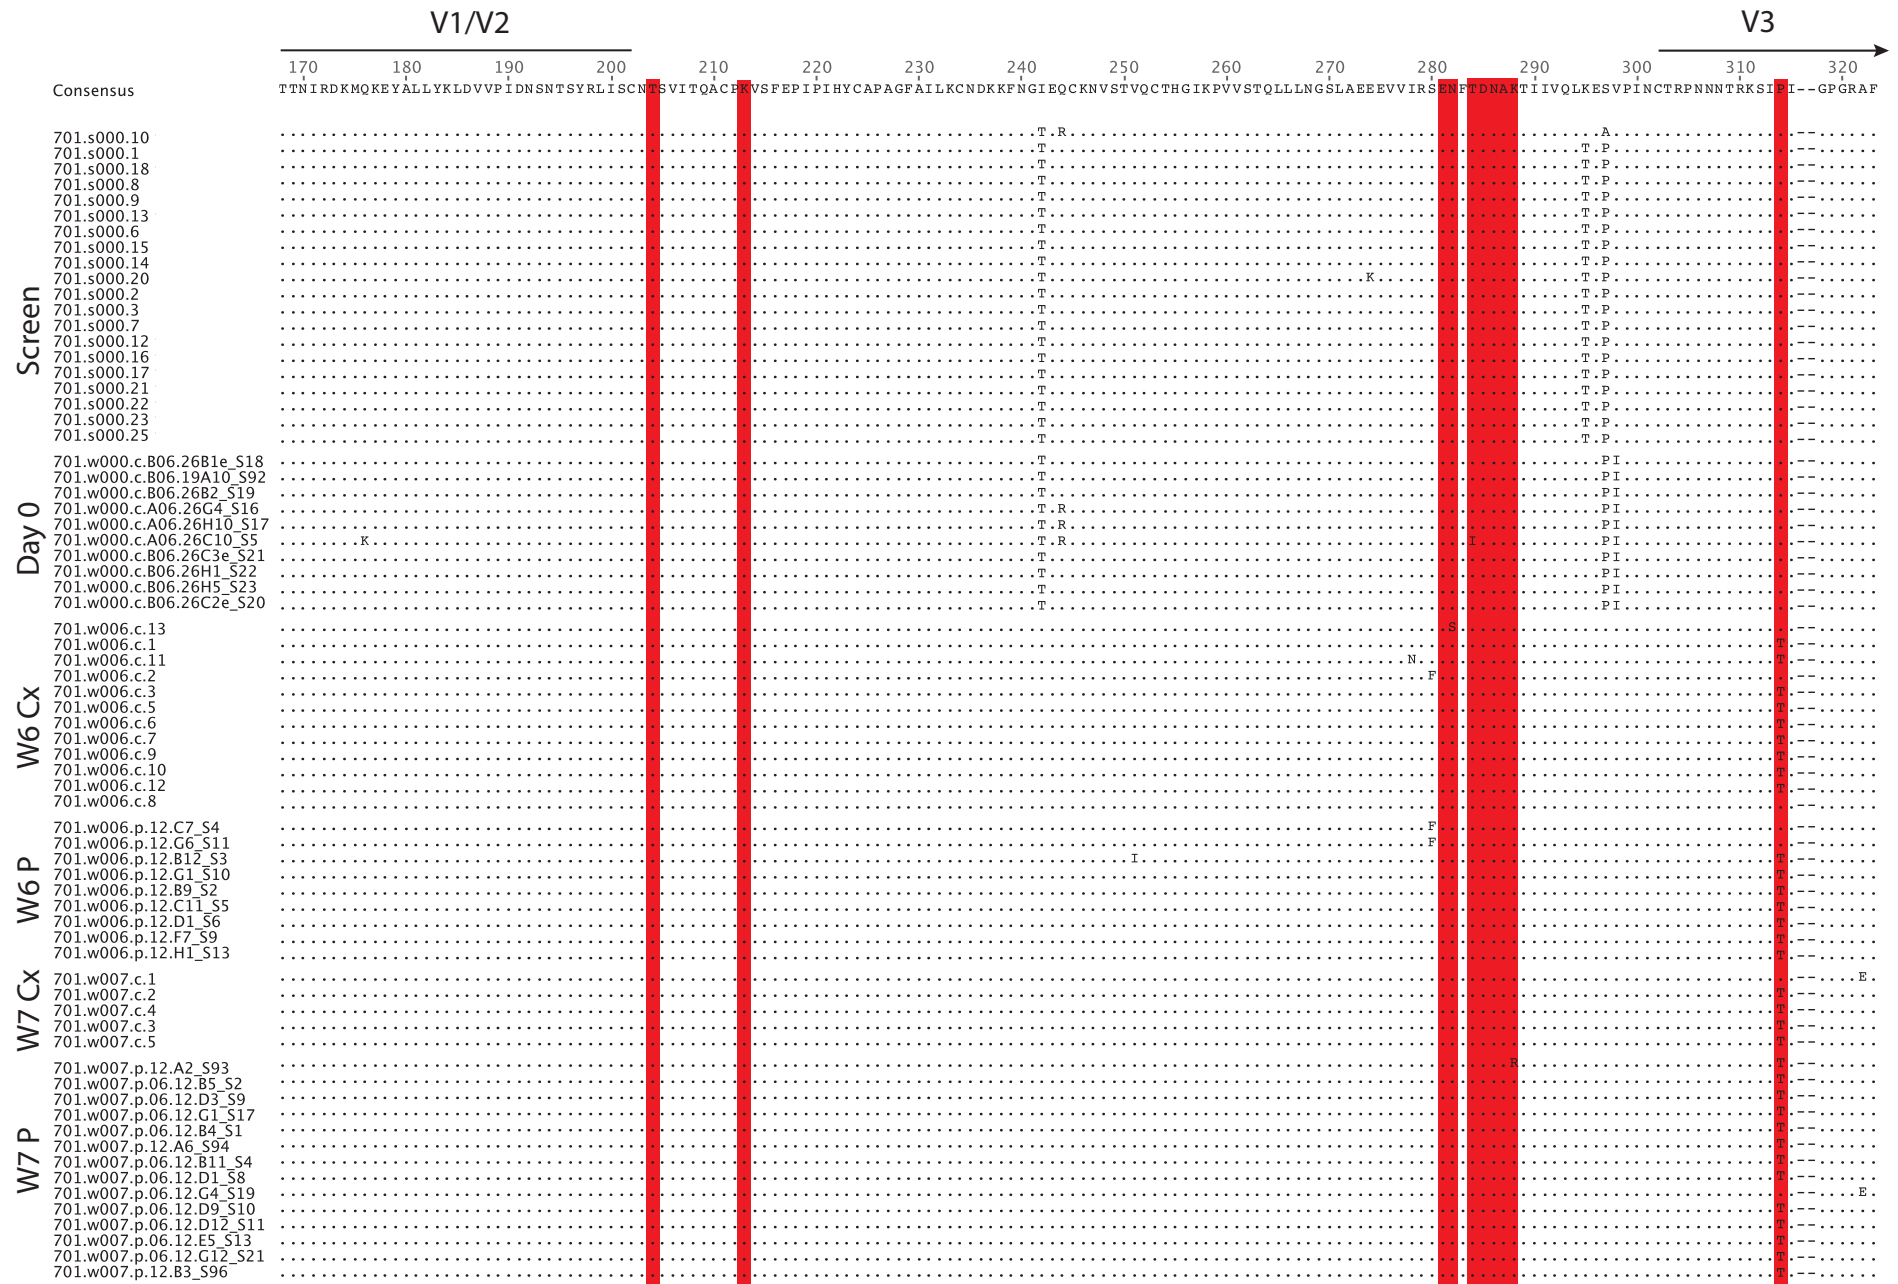

■ 3BNC117 Contacts



Supplementary Figure 2a continued. 701, All GP120 Single Genome Sequences

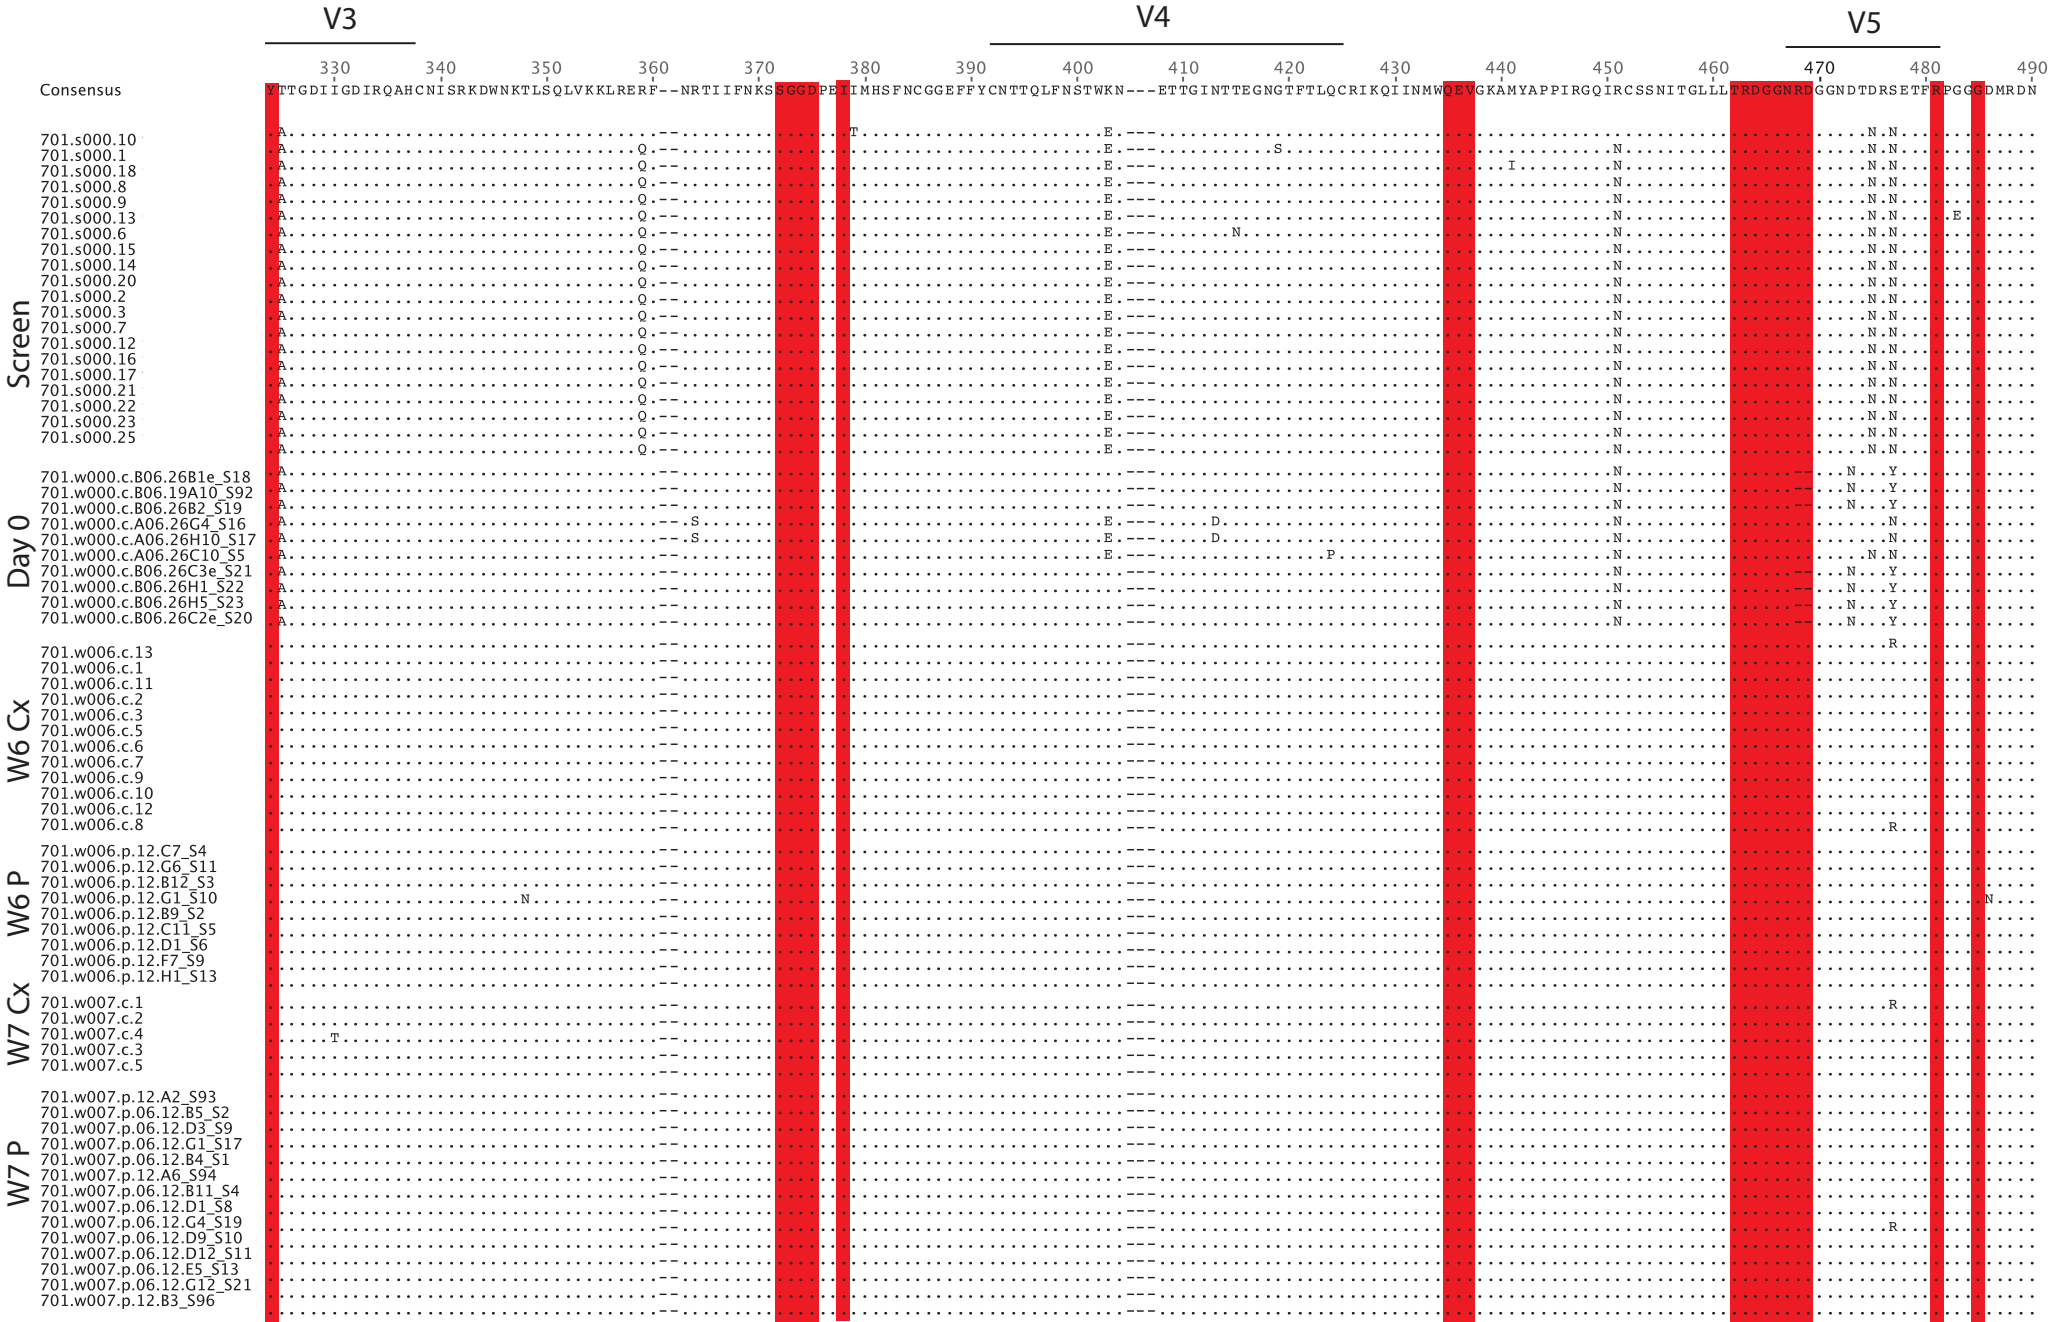

 3BNC117 Contacts

# Supplementary Figure 2b. 702, All GP120 Single Genome Sequences

V1/V2

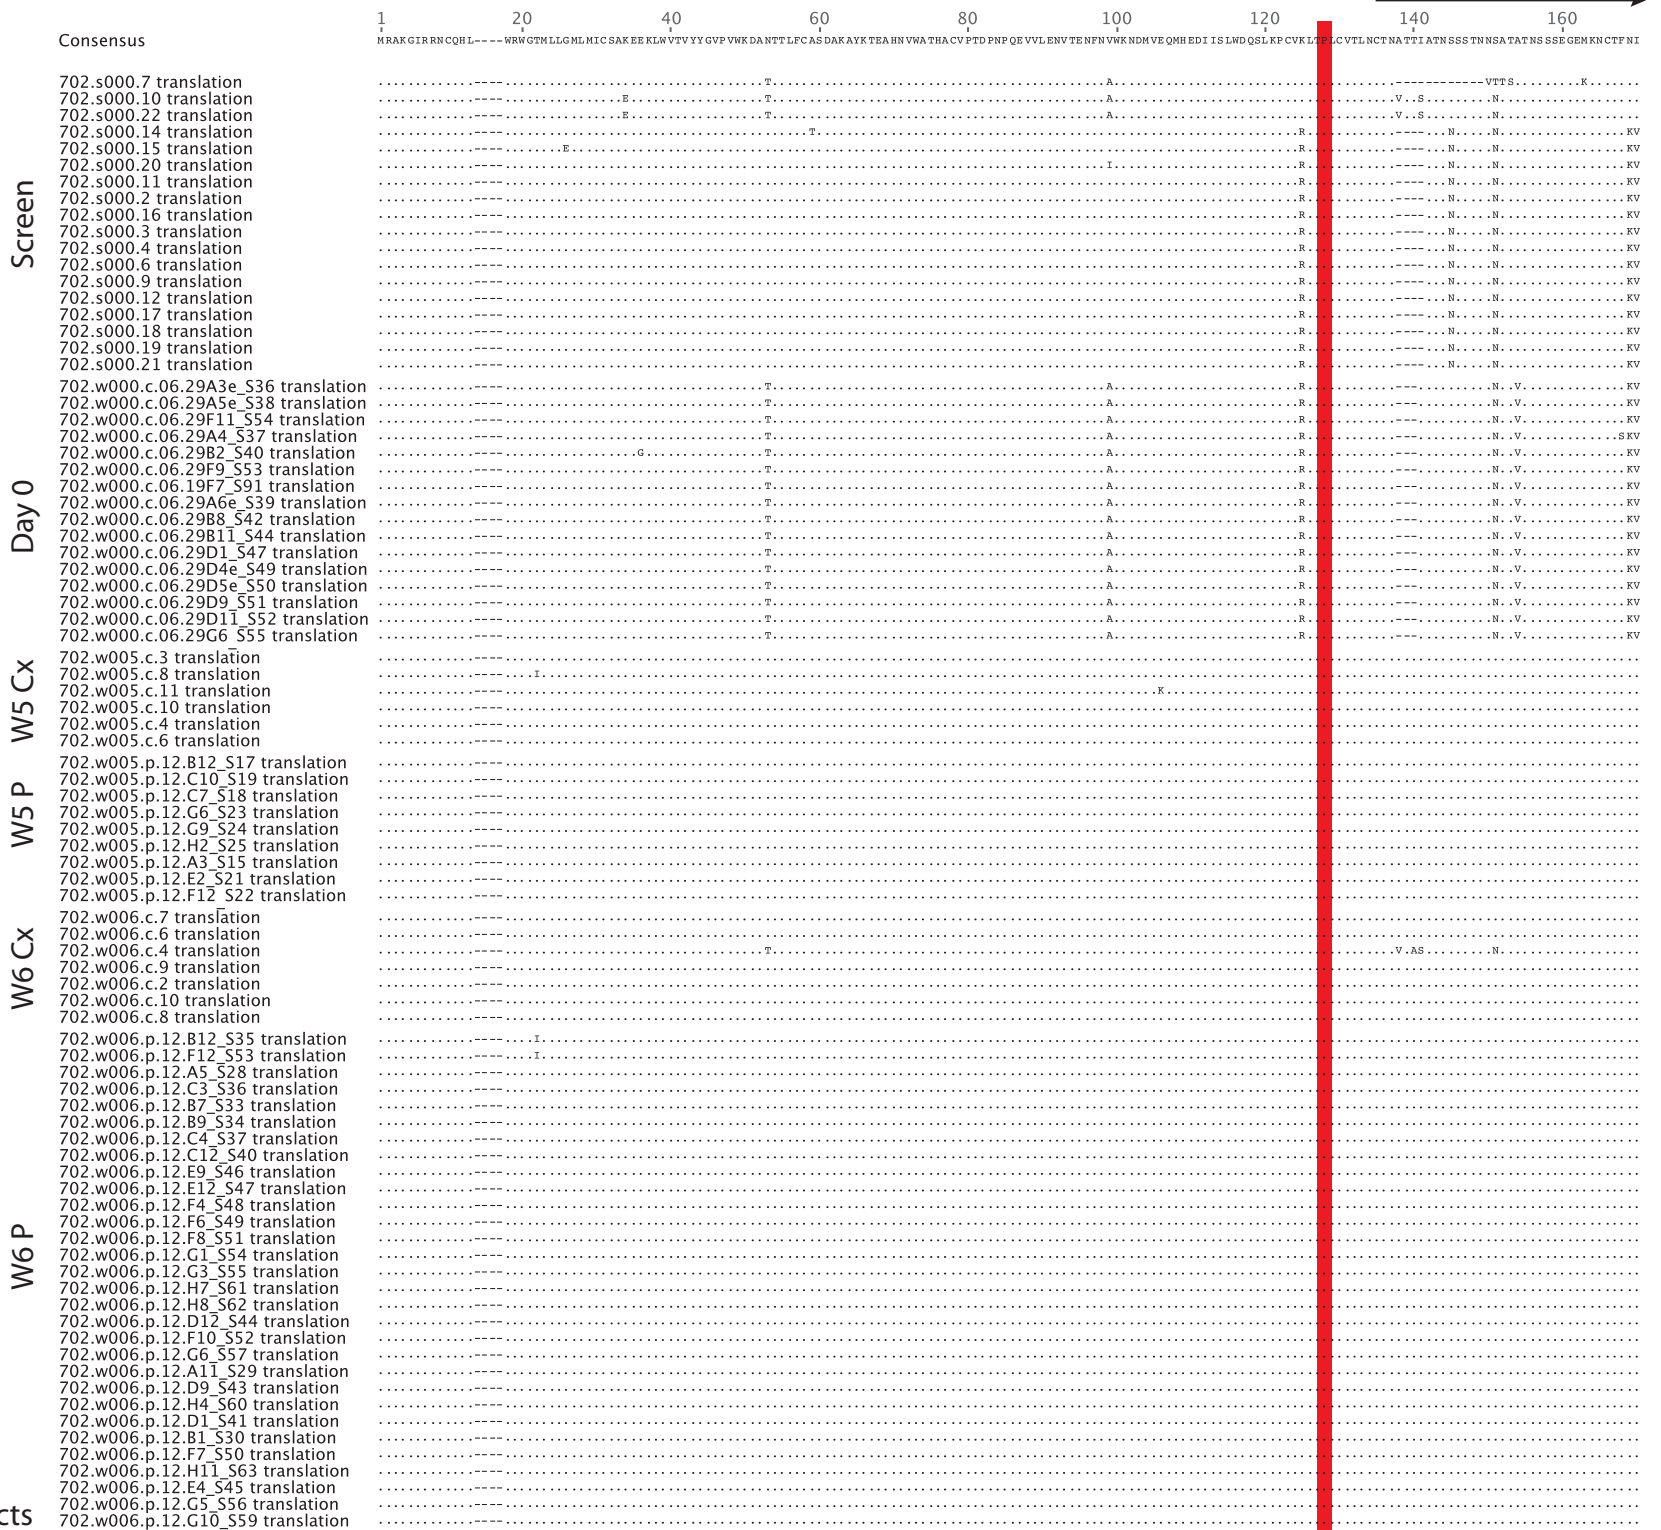

Supplementary Figure 2b continued. 702, All GP120 Single Genome Sequences

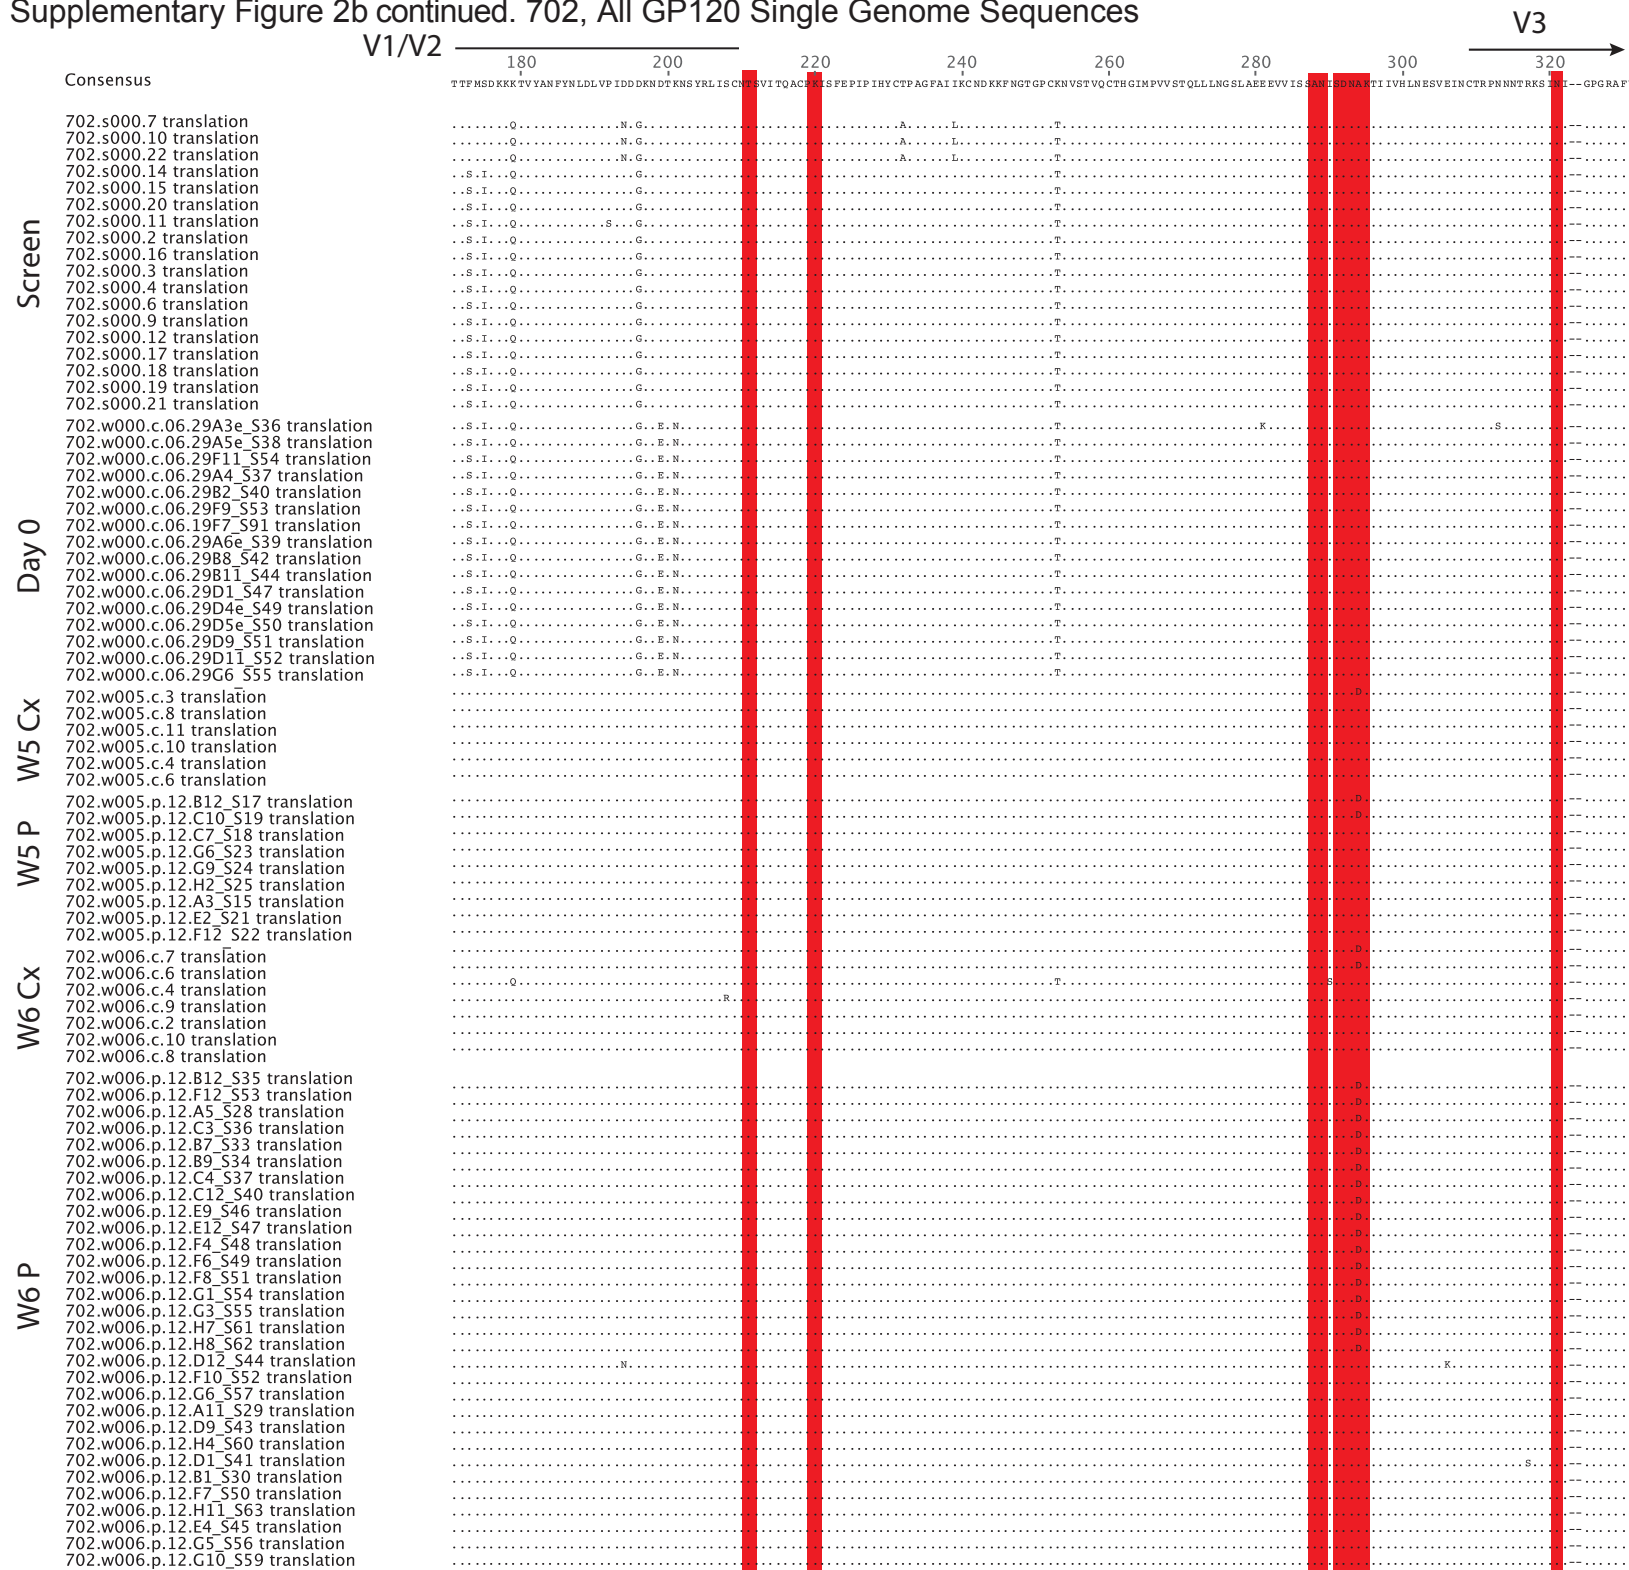

■ 3BNC117 Contacts

Supplementary Figure 2b continued. 702, All GP120 Single Genome Sequences

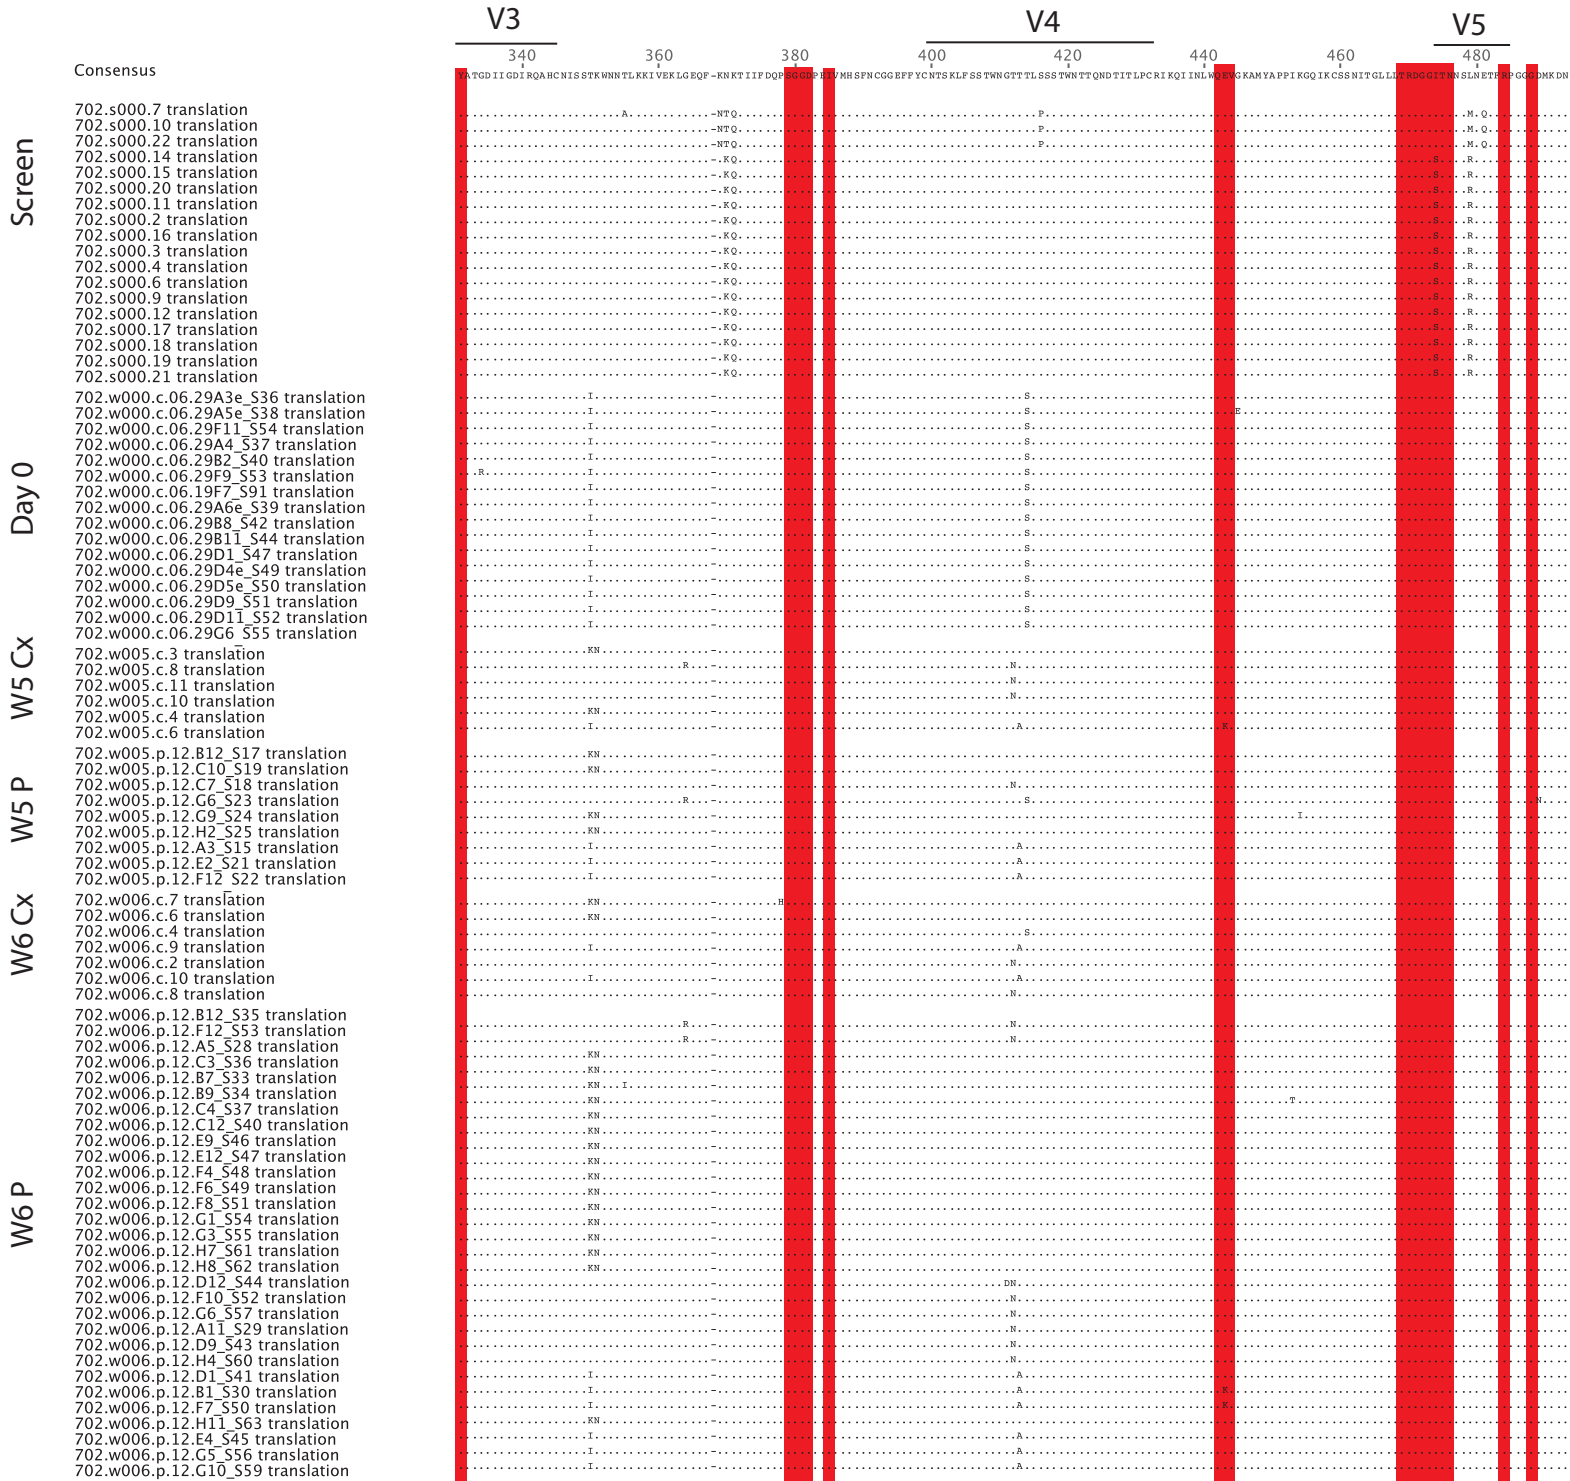

■ 3BNC117 Contacts







Supplementary Figure 2c continued. 703, All GP120 Single Genome Sequences

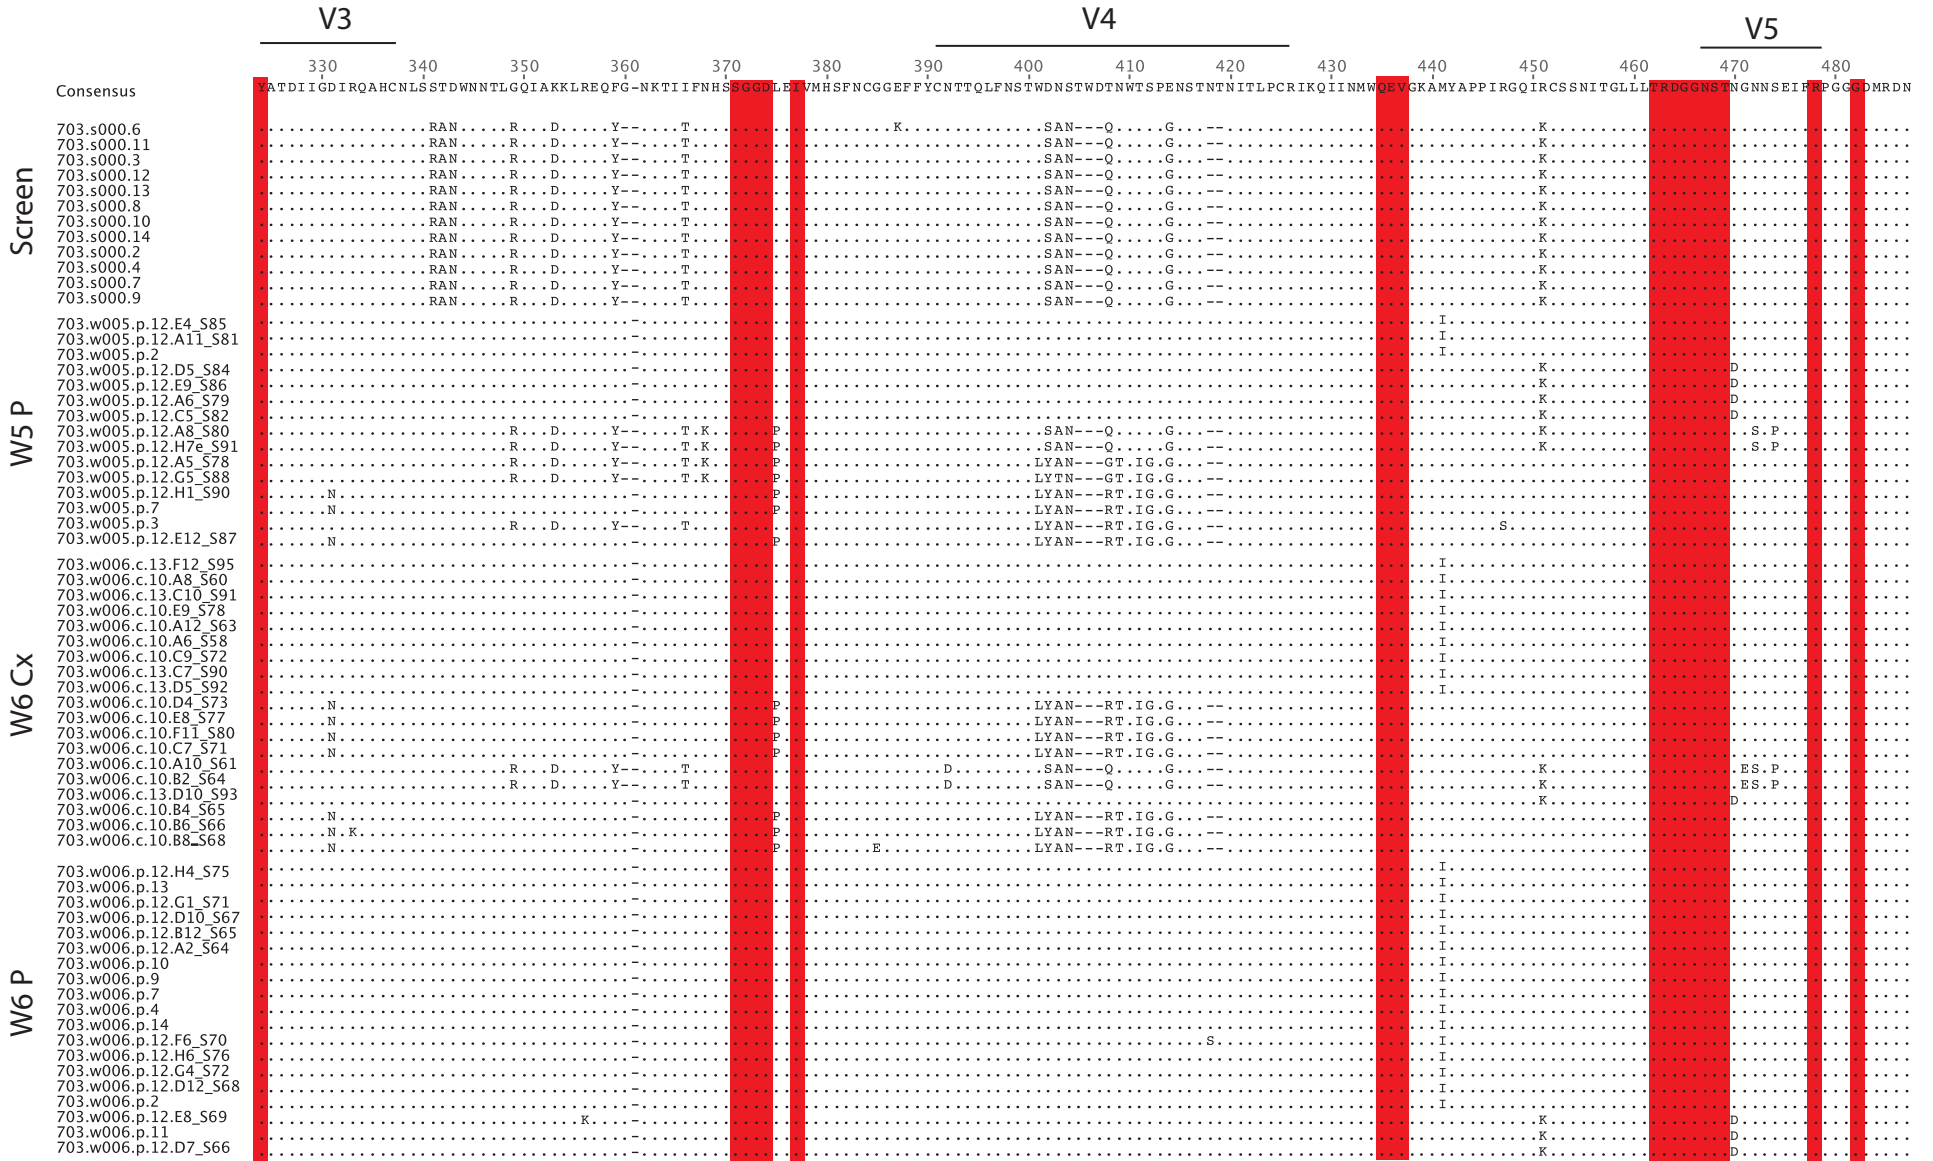

■ 3BNC117 Contacts

# Supplementary Figure 2d. 704, All GP120 Single Genome Sequences

V1/V2 →

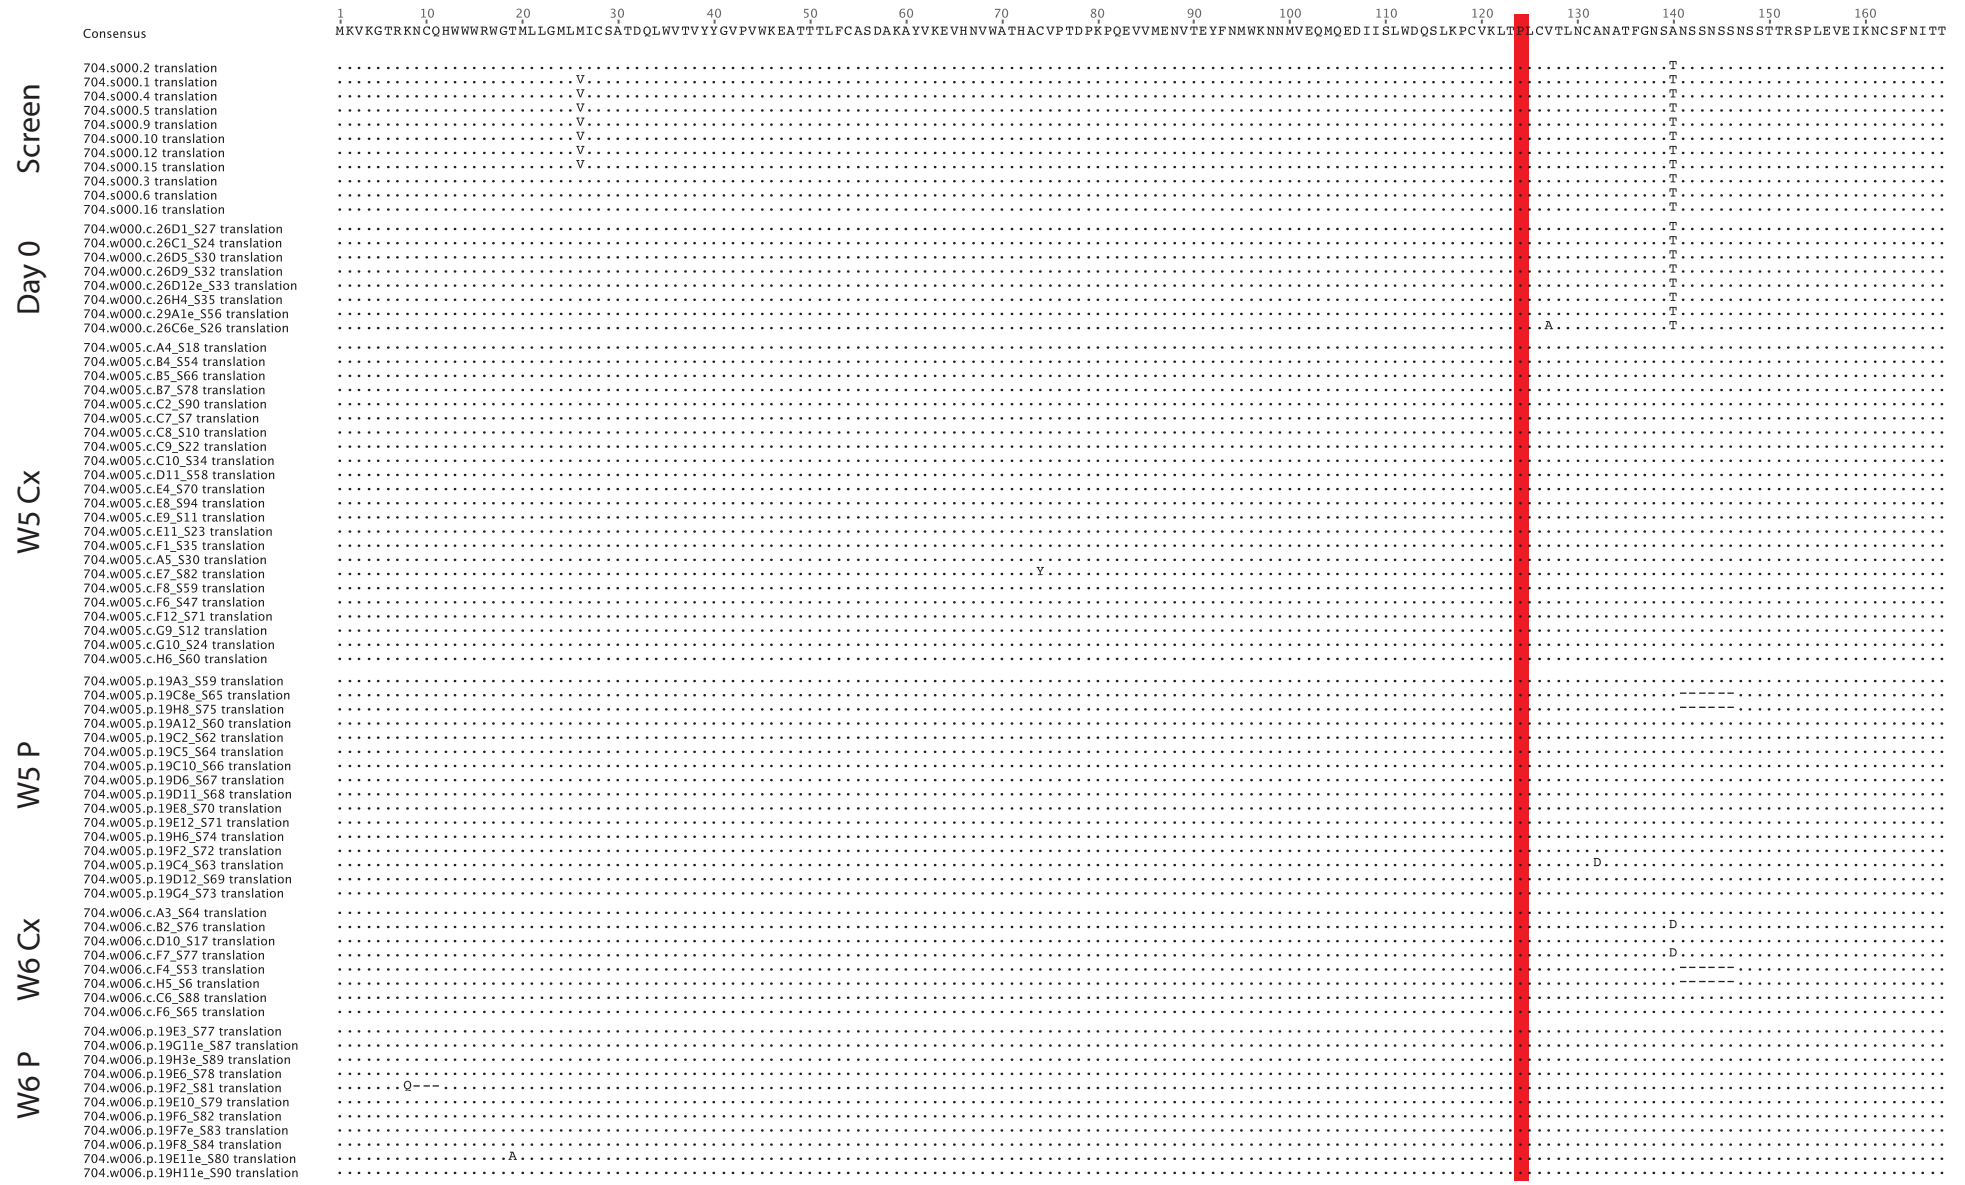

■ 3BNC117 Contacts



# Supplementary Figure 2d continued. 704, All GP120 Single Genome Sequences

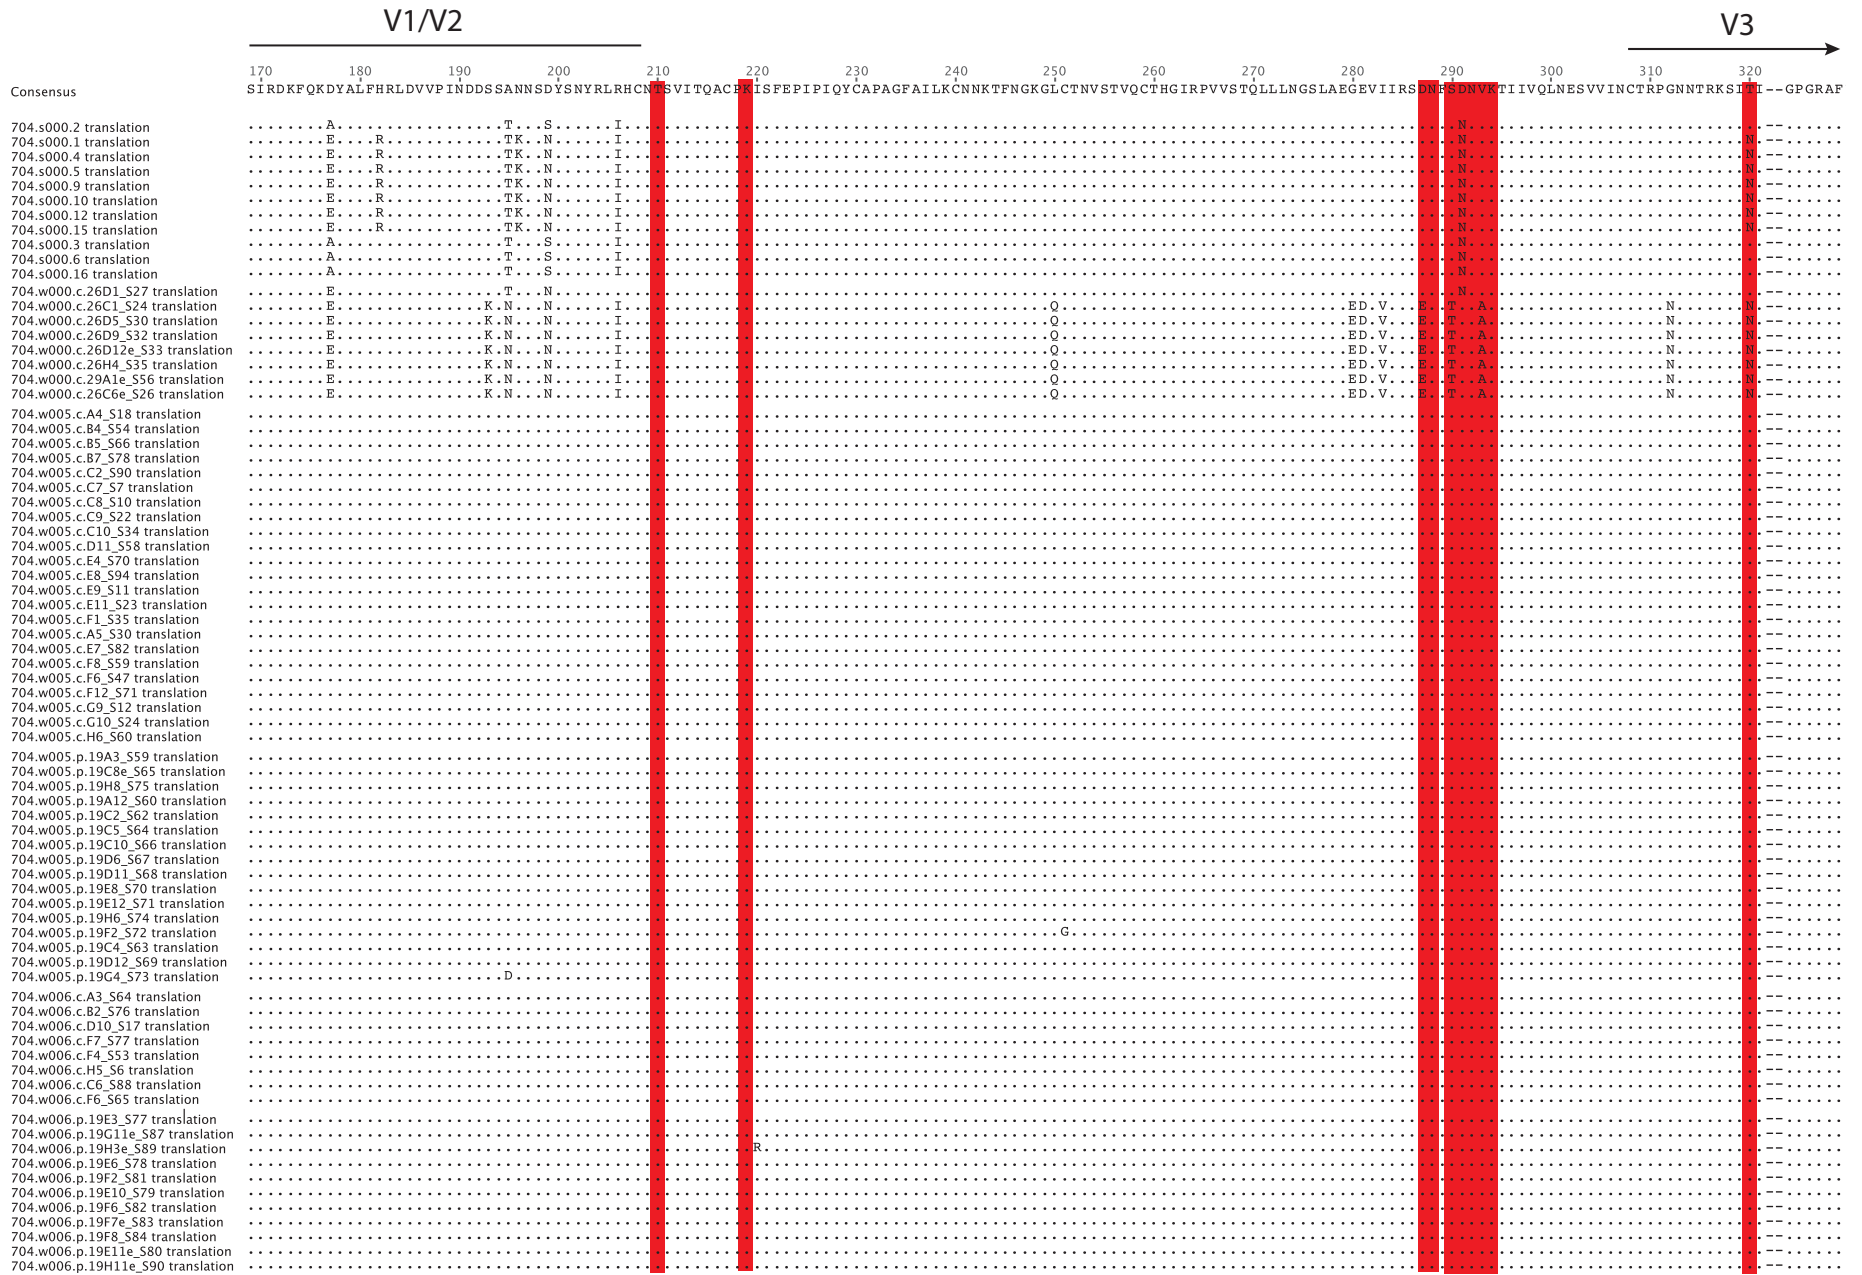

■ 3BNC117 Contacts



# Supplementary Figure 2e. 707, All GP120 Single Genome Sequences

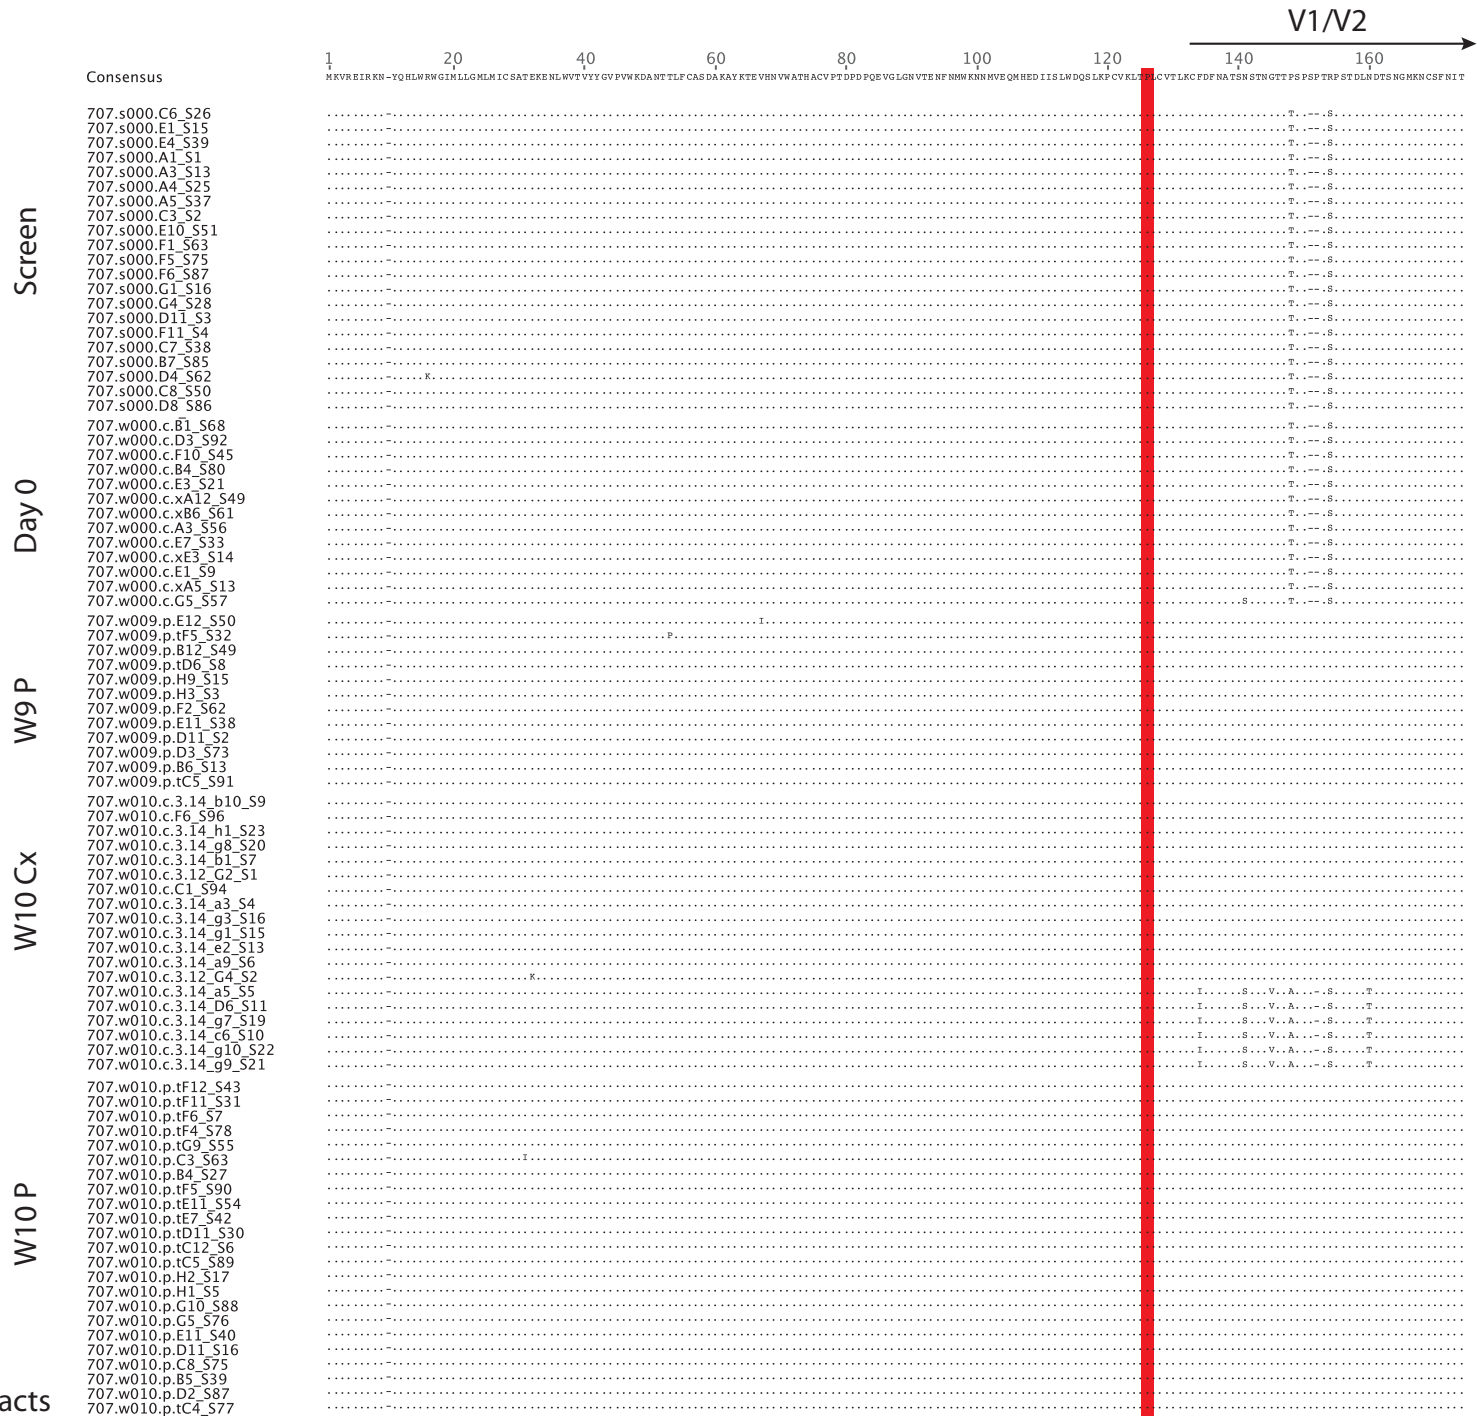

Supplementary Figure 2e continued. 707, All GP120 Single Genome Sequences

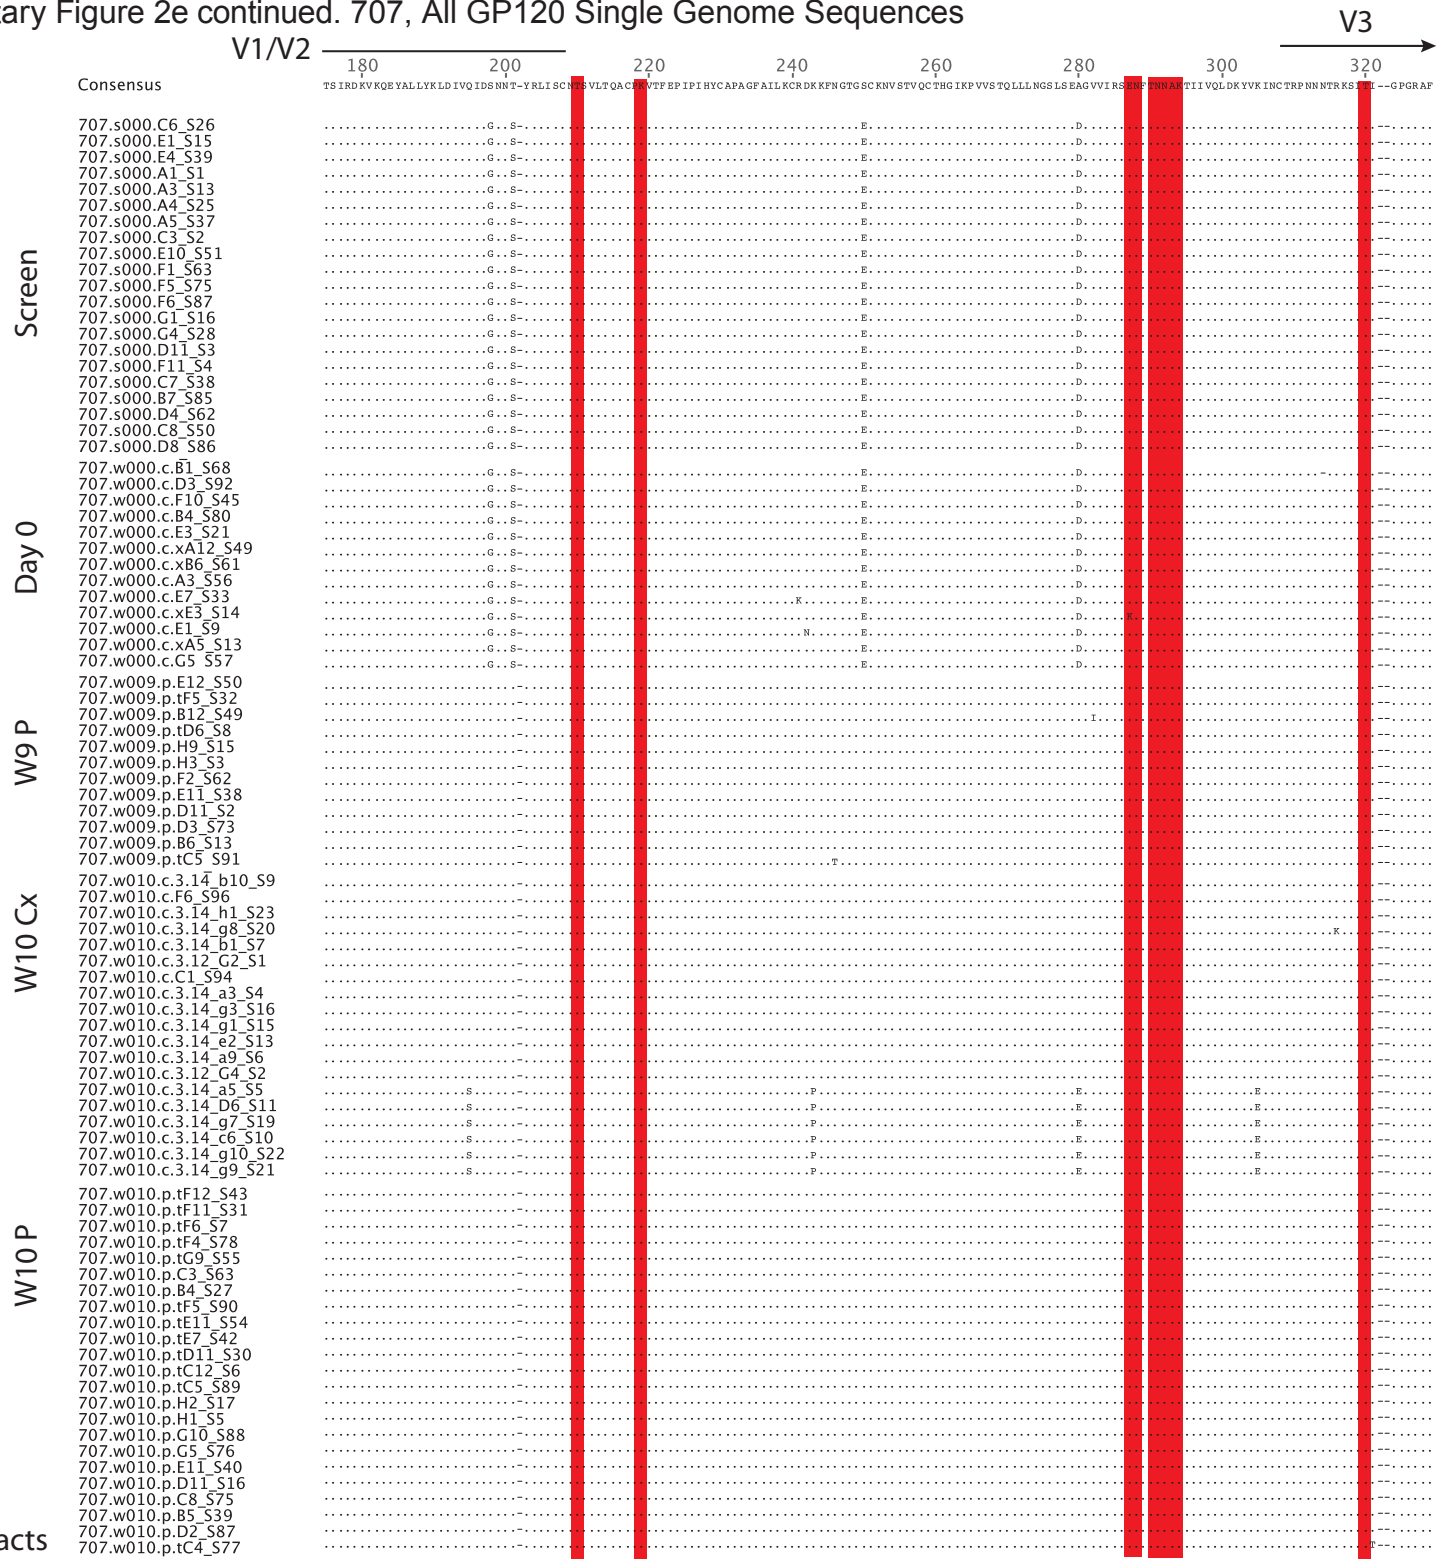

Supplementary Figure 2e continued. 707, All GP120 Single Genome Sequences

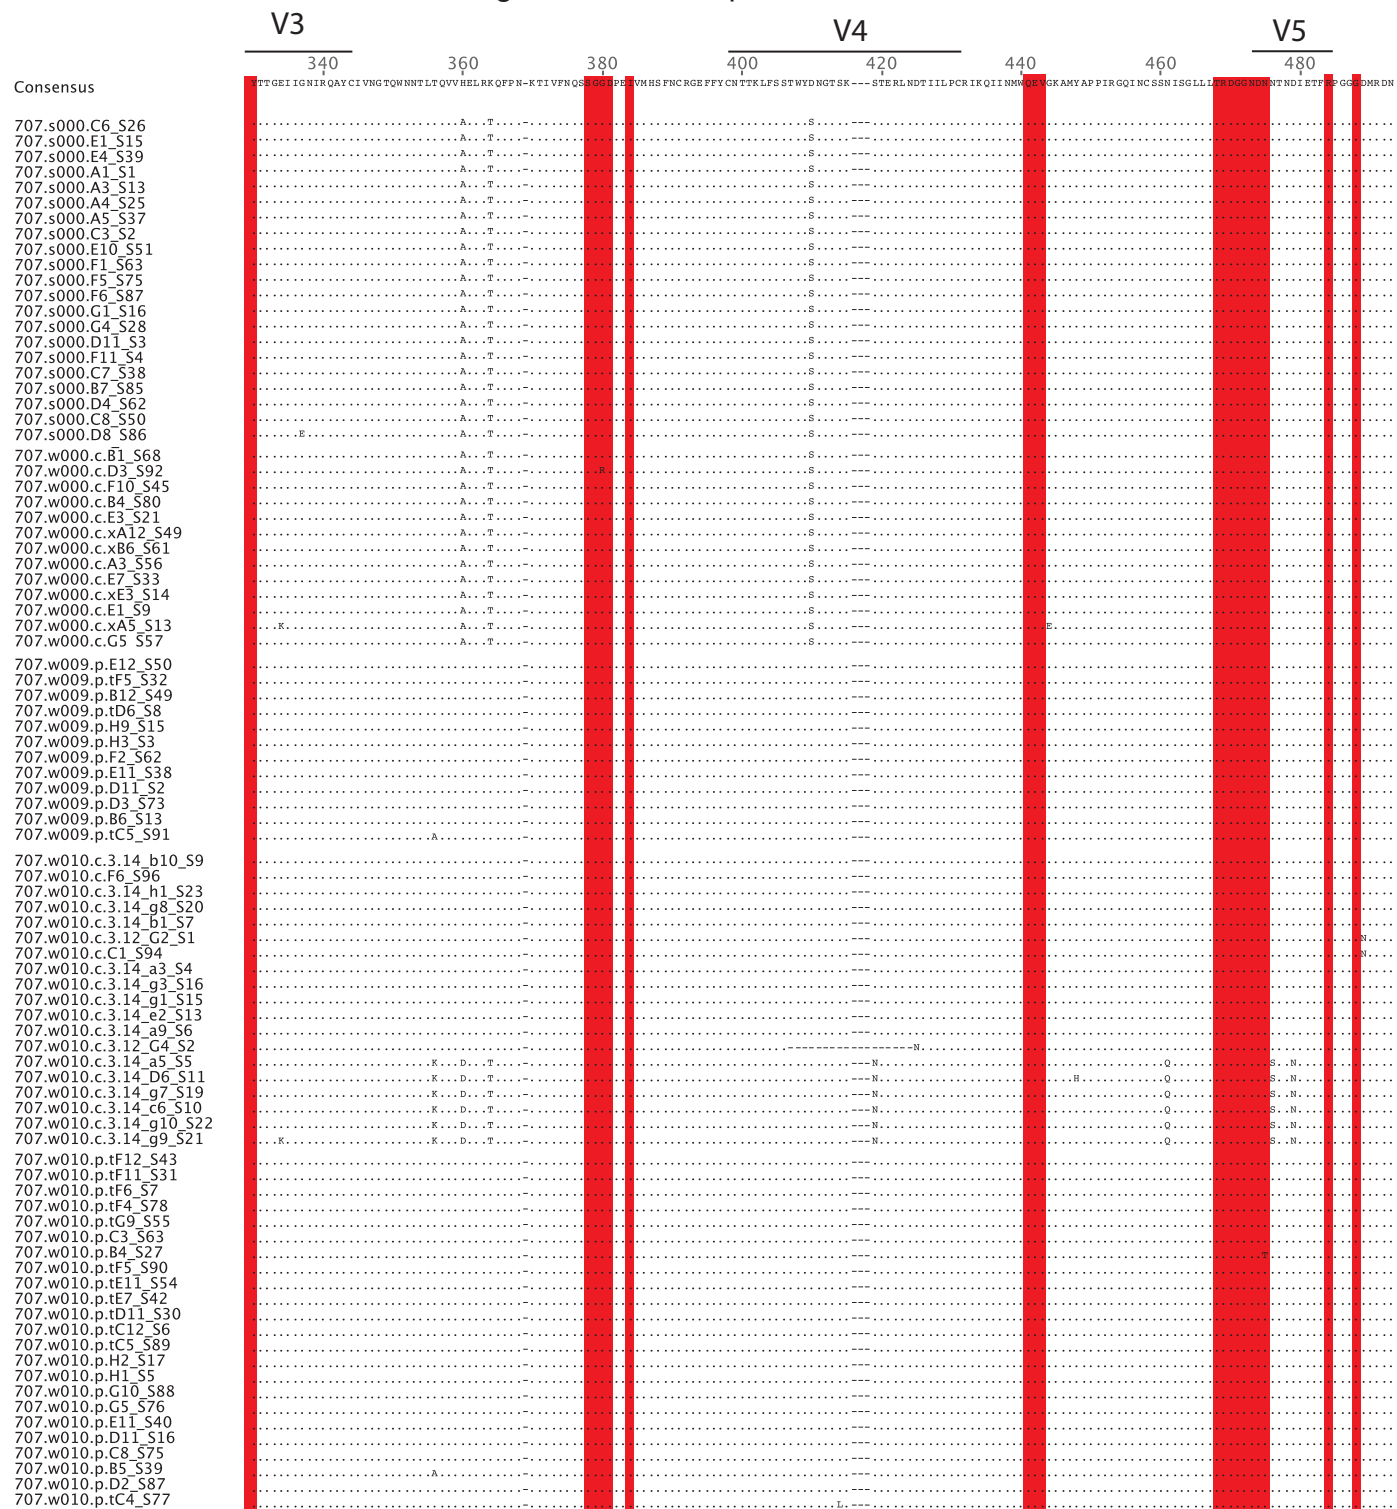



# Supplementary Figure 2f. 708, All GP120 Single Genome Sequences

V1/V2

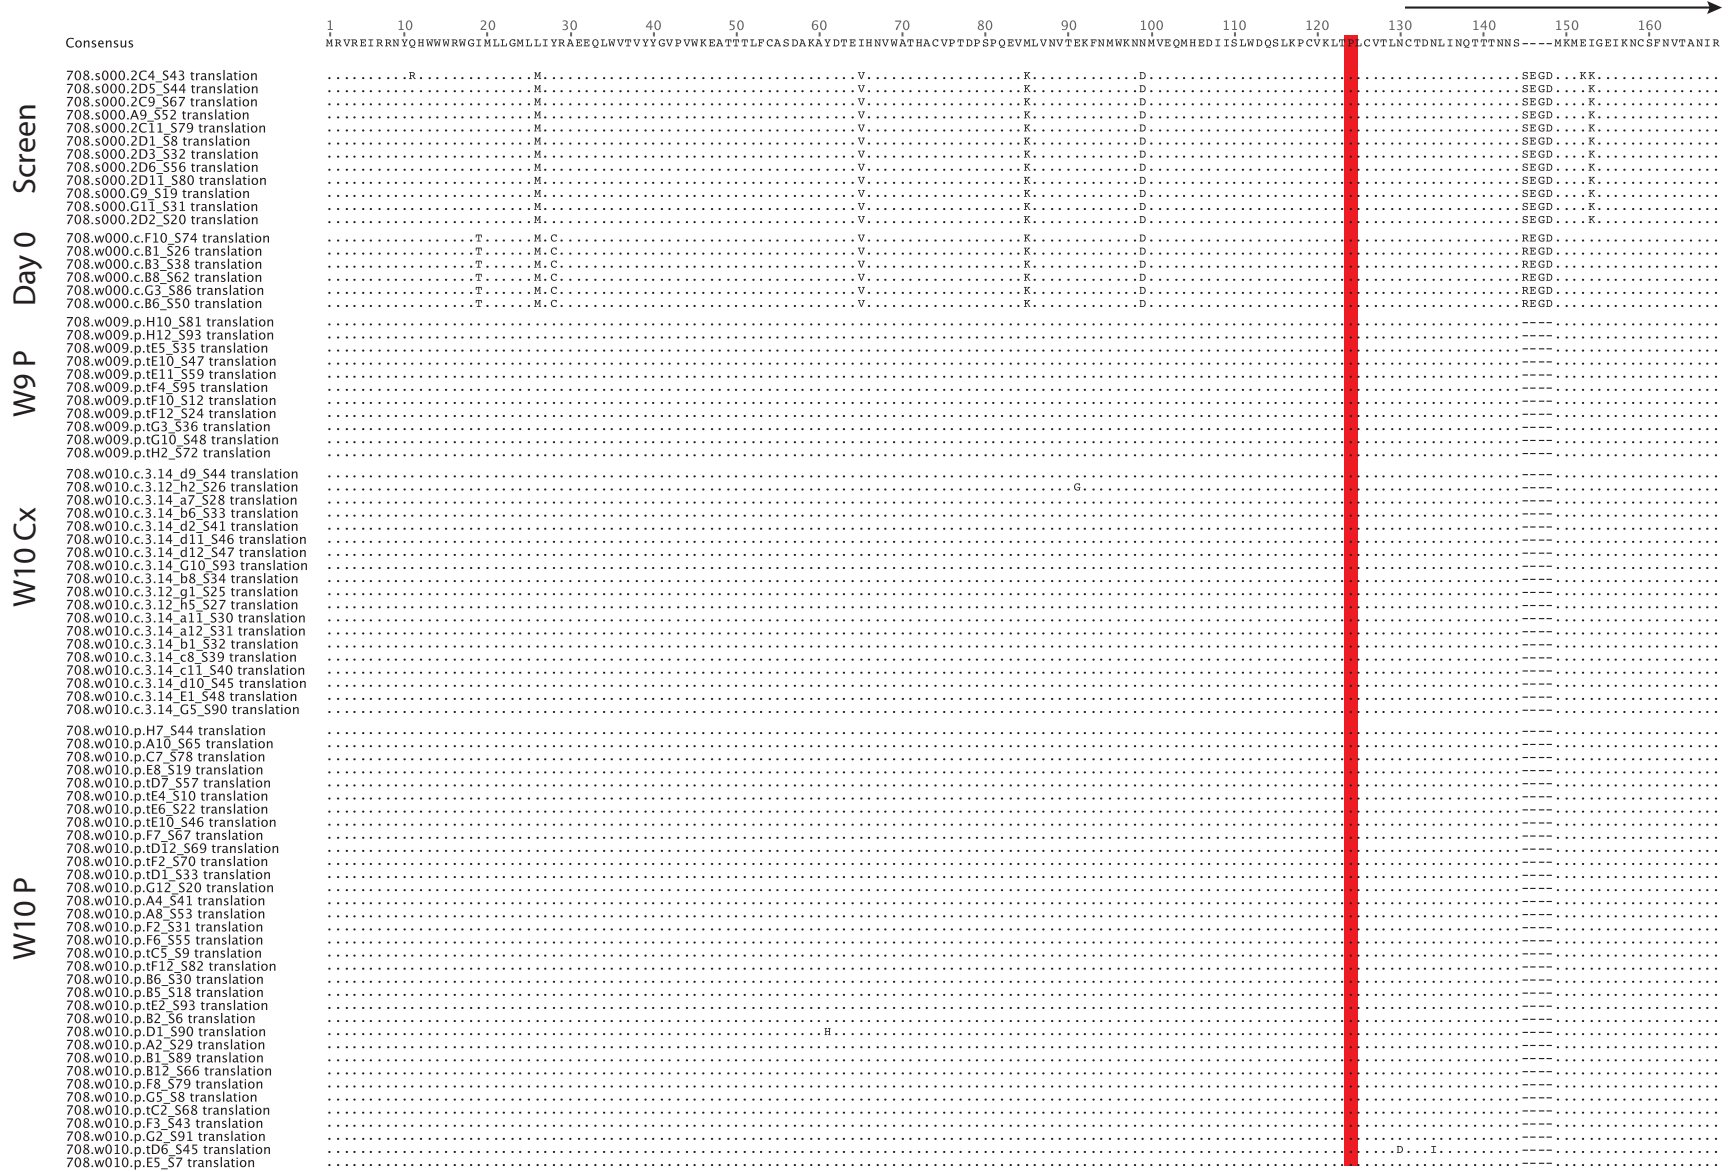

3BNC117 Contacts

Supplementary Figure 2f continued. 708, All GP120 Single Genome Sequences

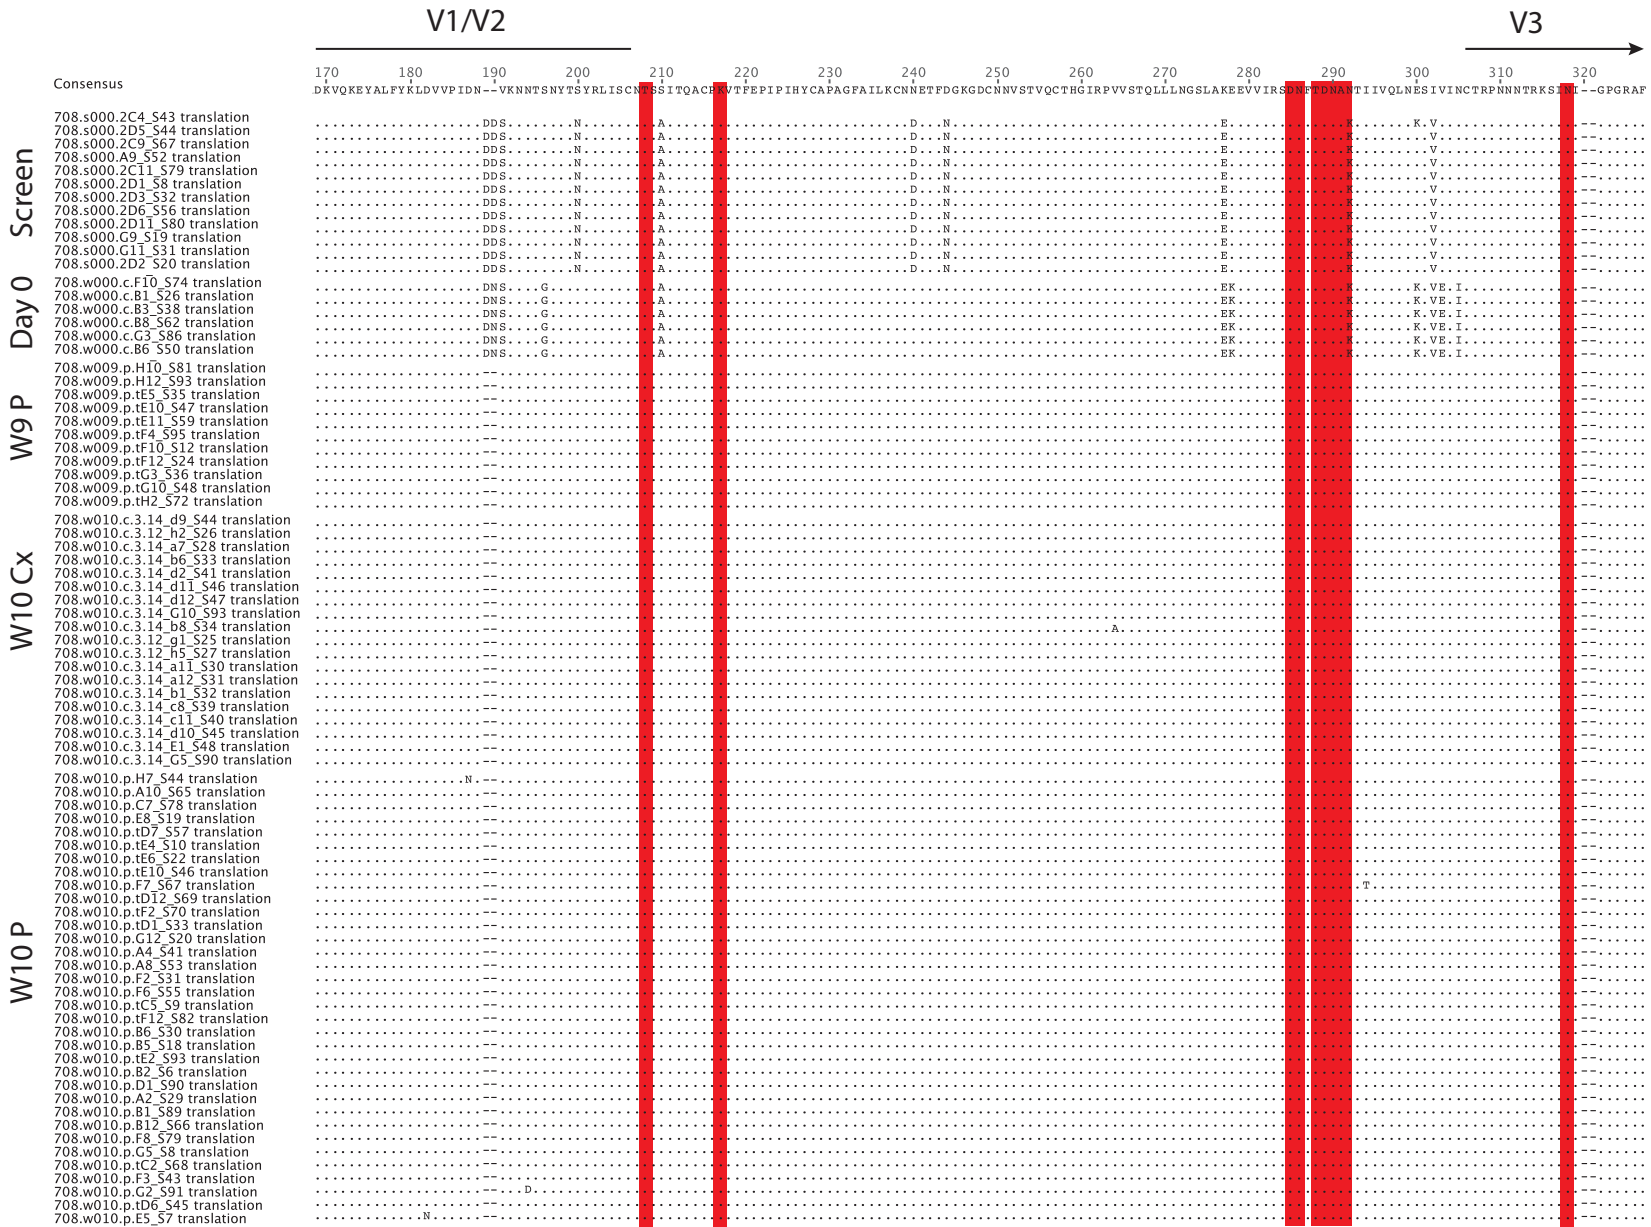

■ 3BNC117 Contacts

Supplementary Figure 2f continued. 708, All GP120 Single Genome Sequences

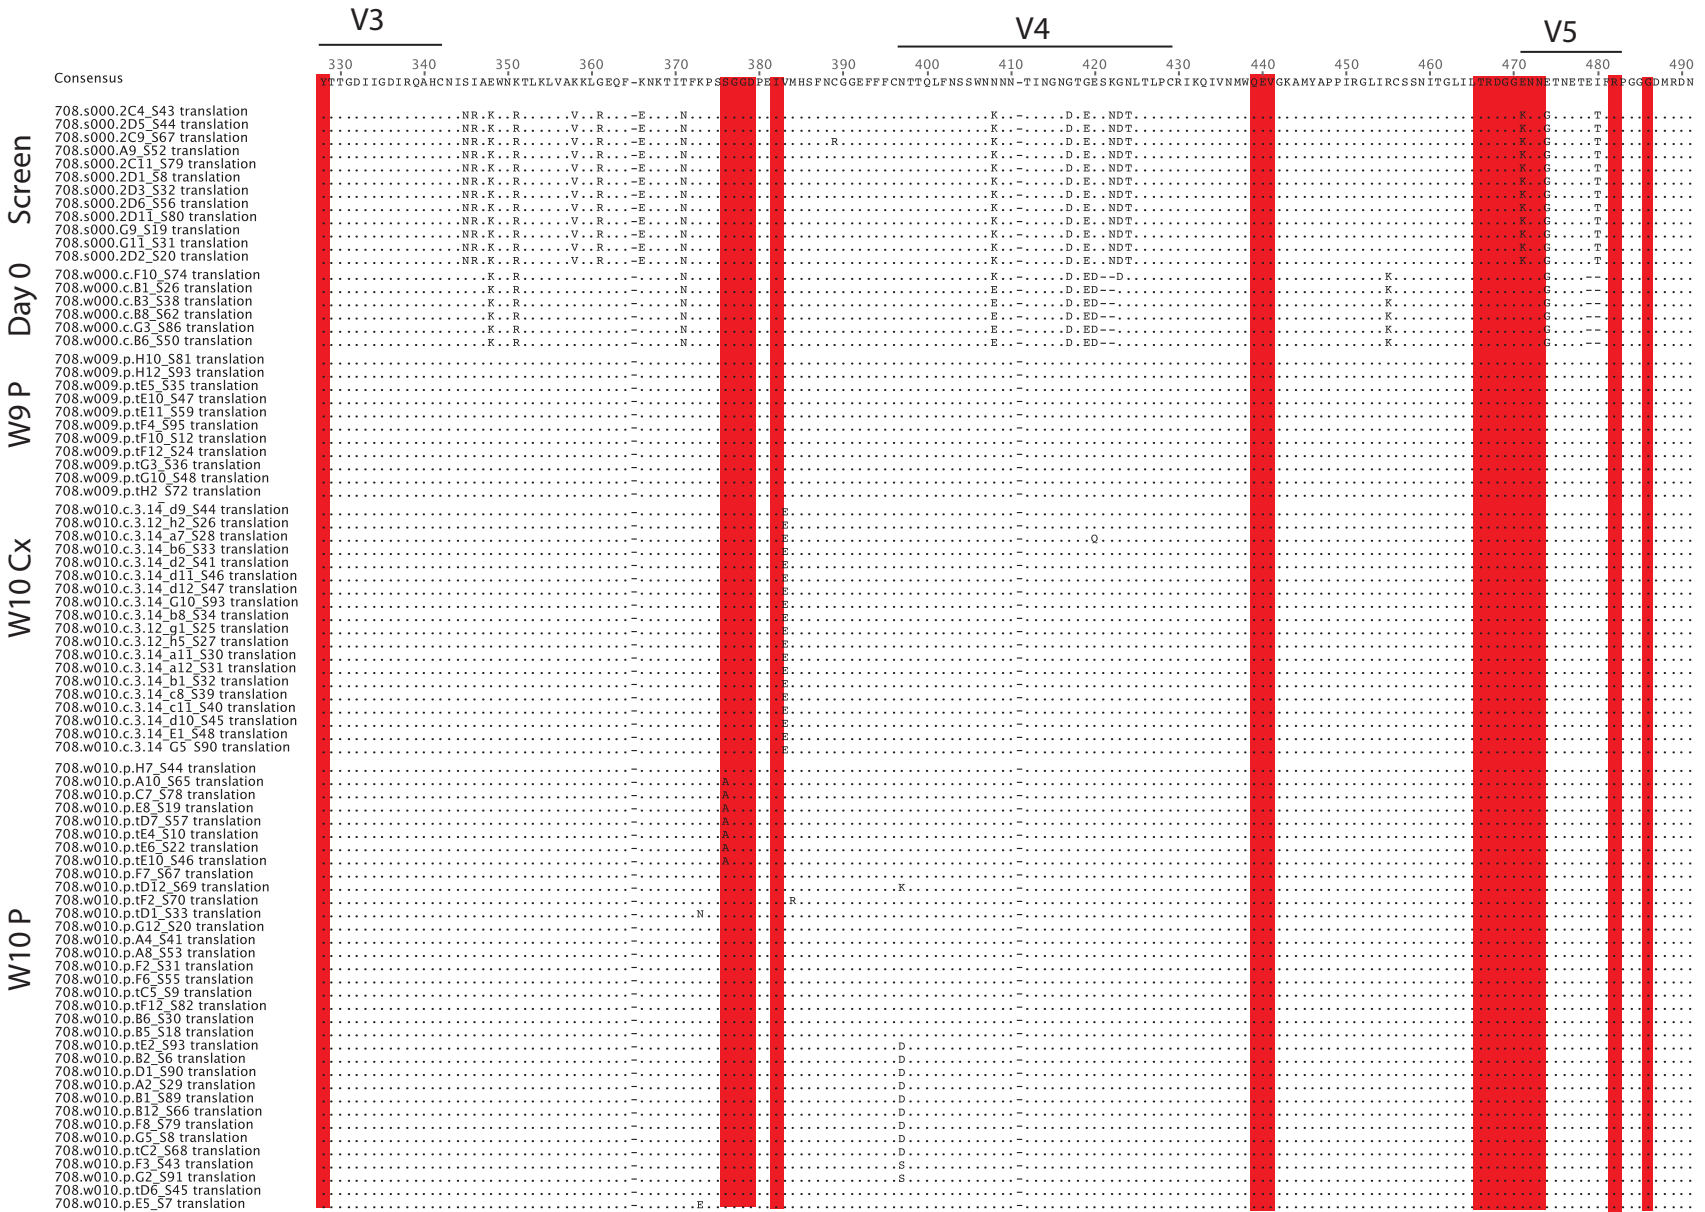

■ 3BNC117 Contacts



# Supplementary Figure 2g. 709, All GP120 Single Genome Sequences

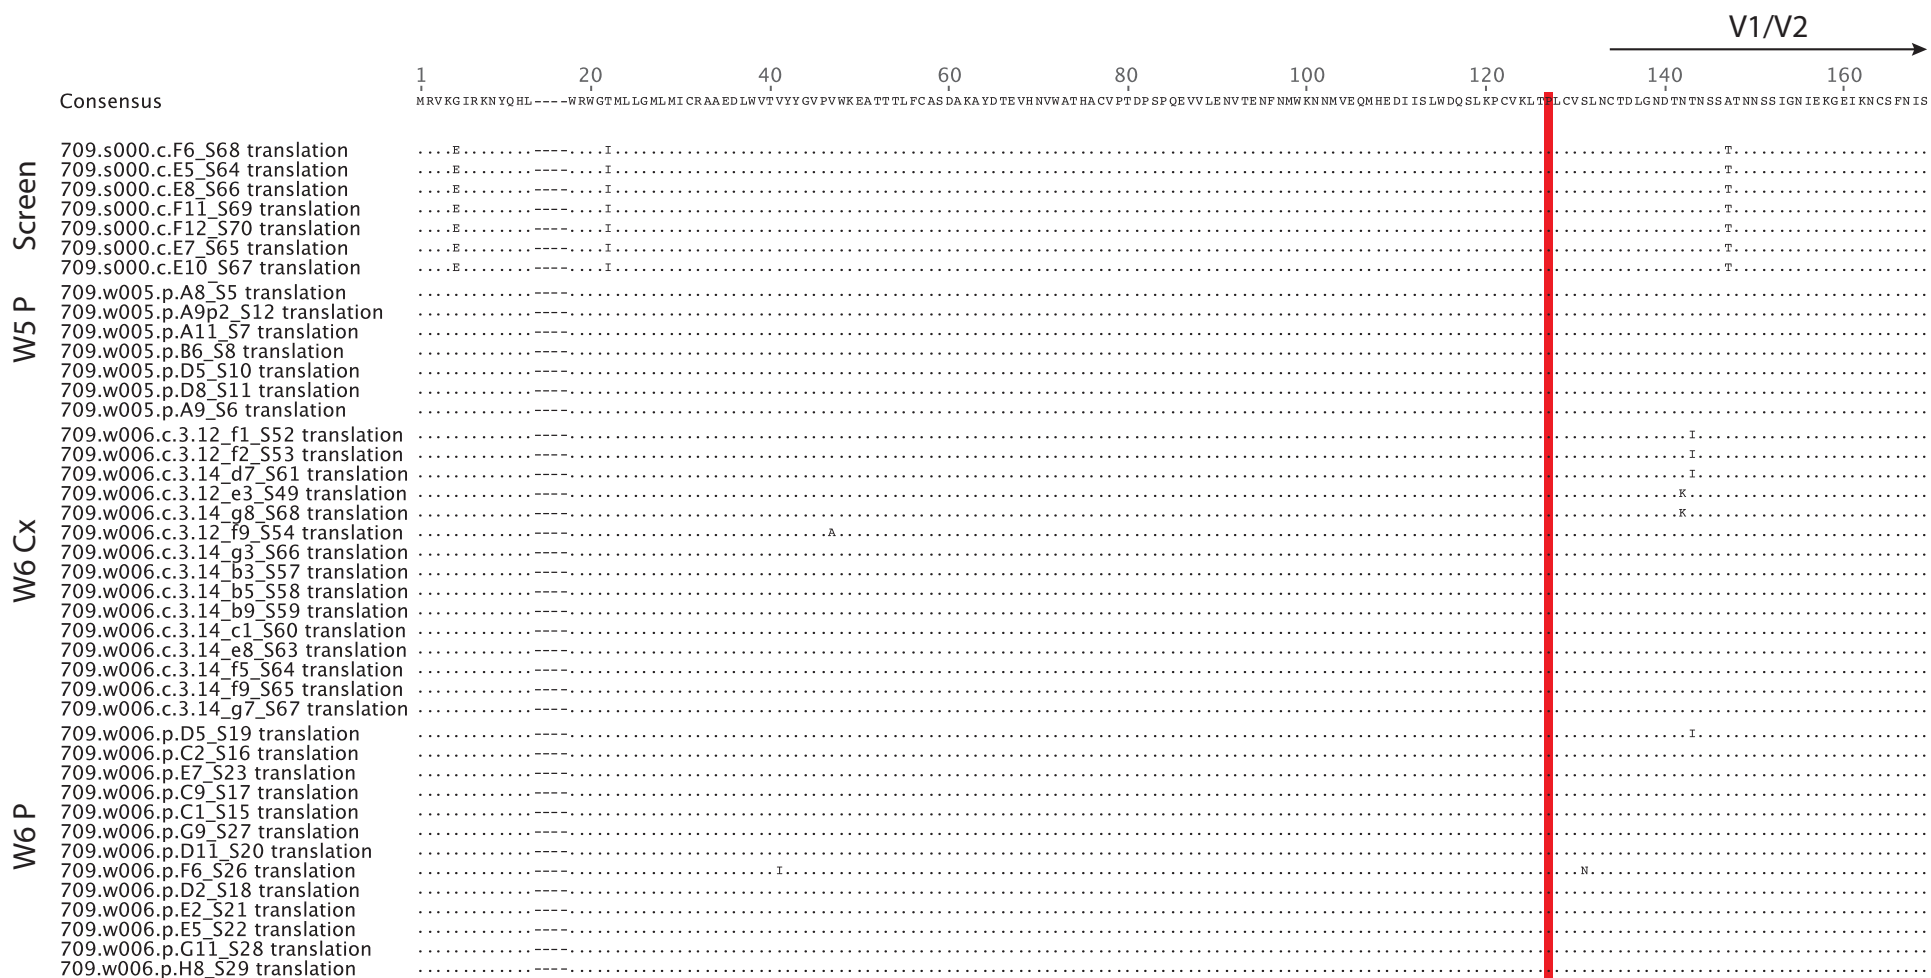

■ 3BNC117 Contacts

Supplementary Figure 2g continued. 709, All GP120 Single Genome Sequences

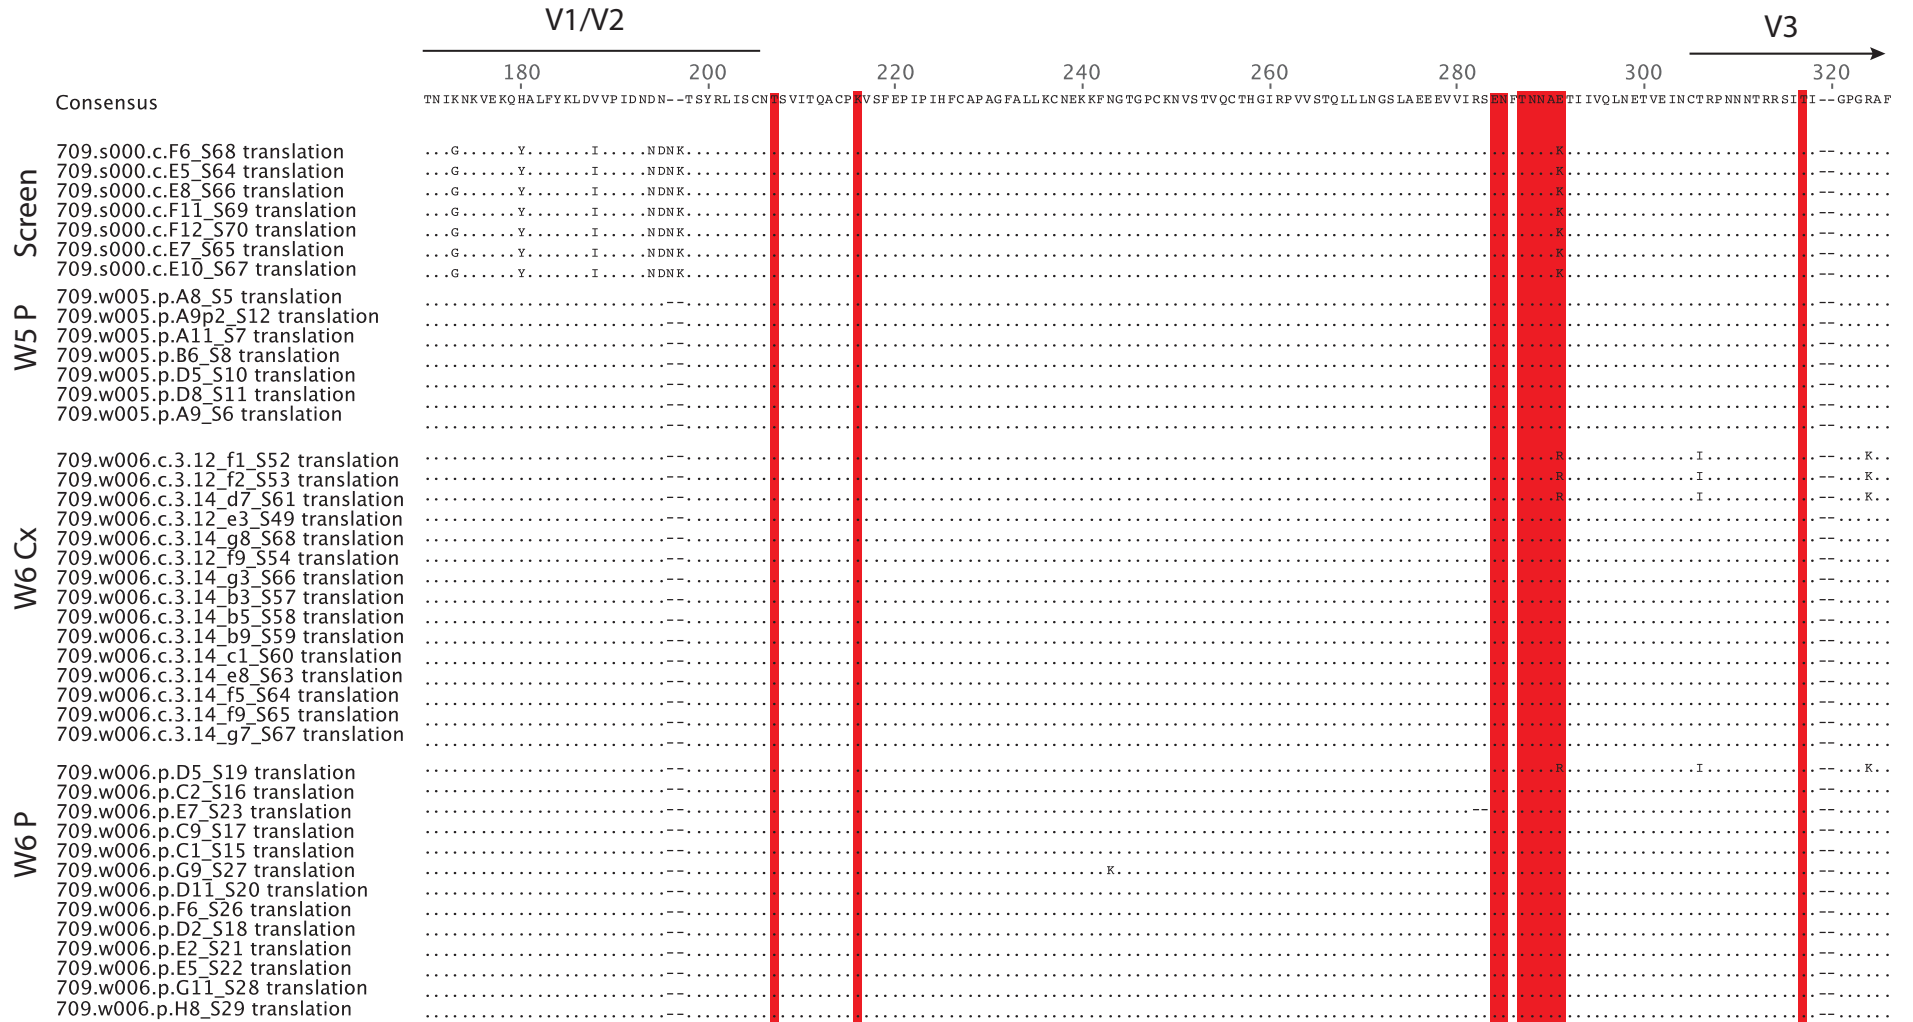

■ 3BNC117 Contacts

Supplementary Figure 2g continued. 709, All GP120 Single Genome Sequences

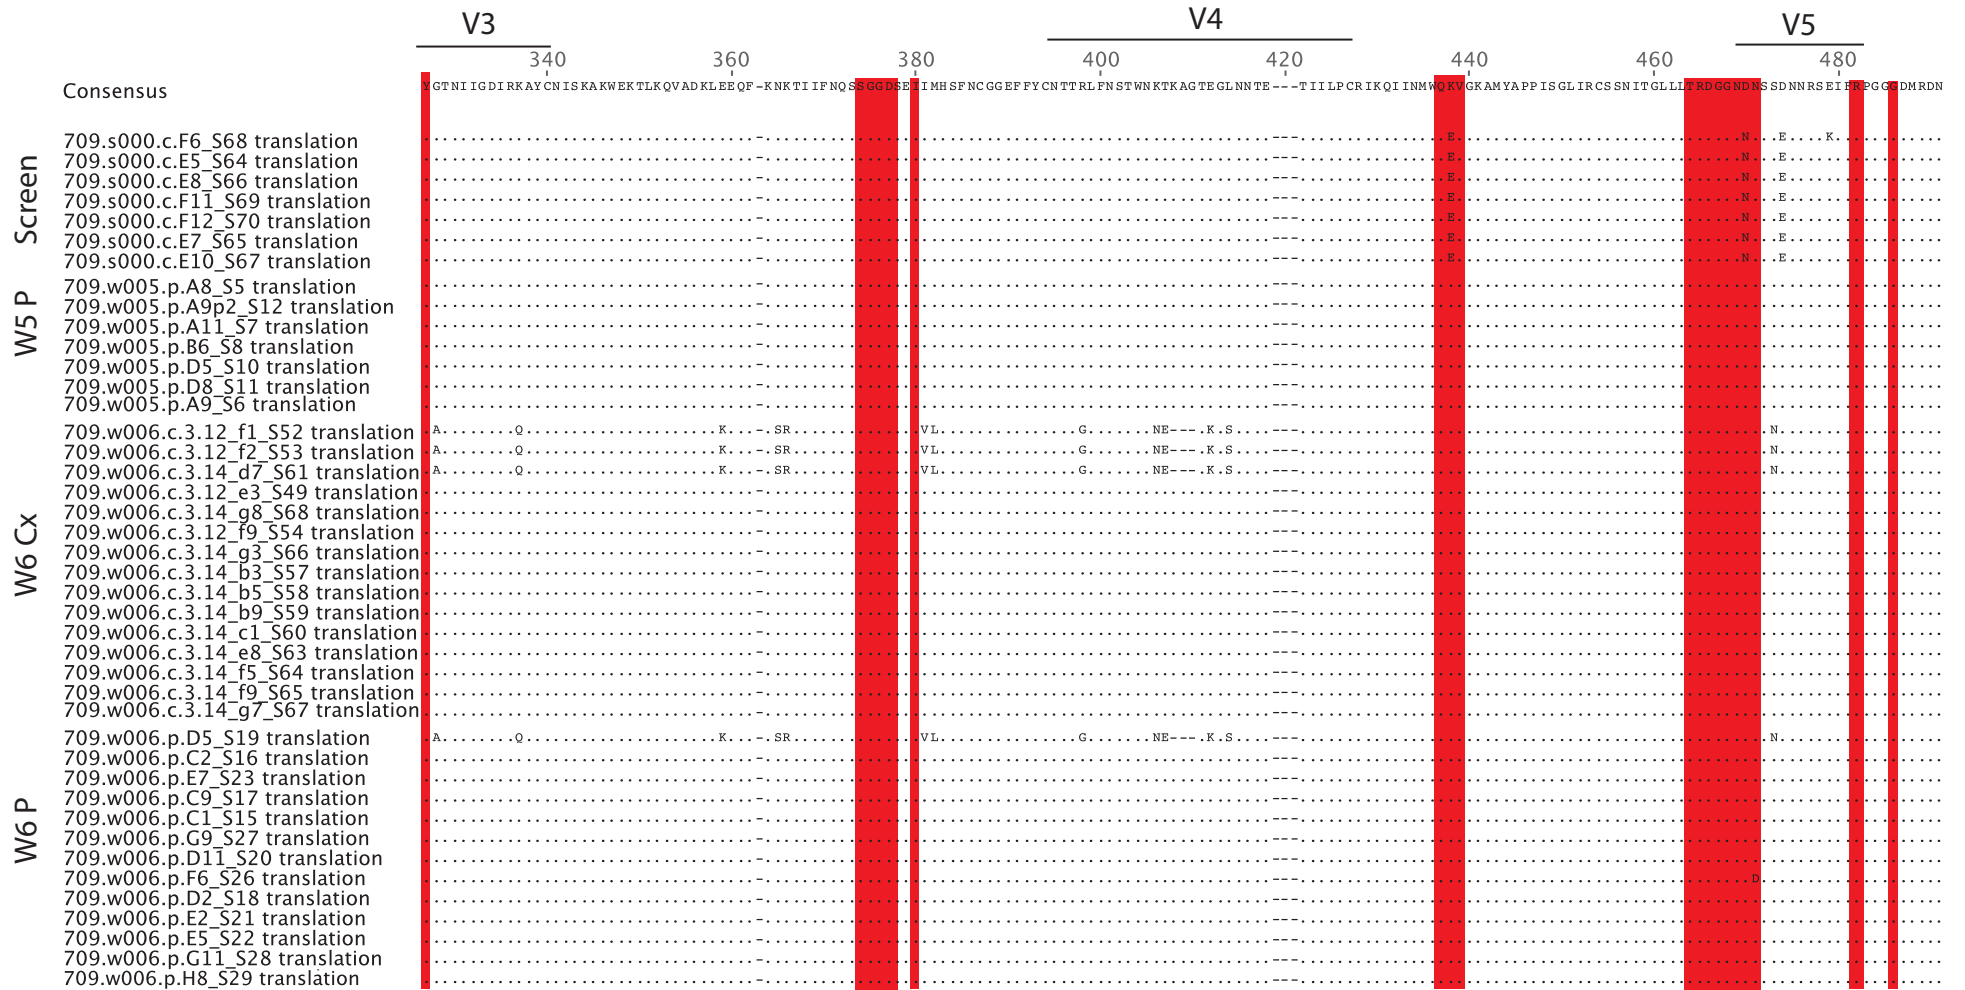

■ 3BNC117 Contacts

# Supplementary Figure 2h. 711, All GP120 Single Genome Sequences

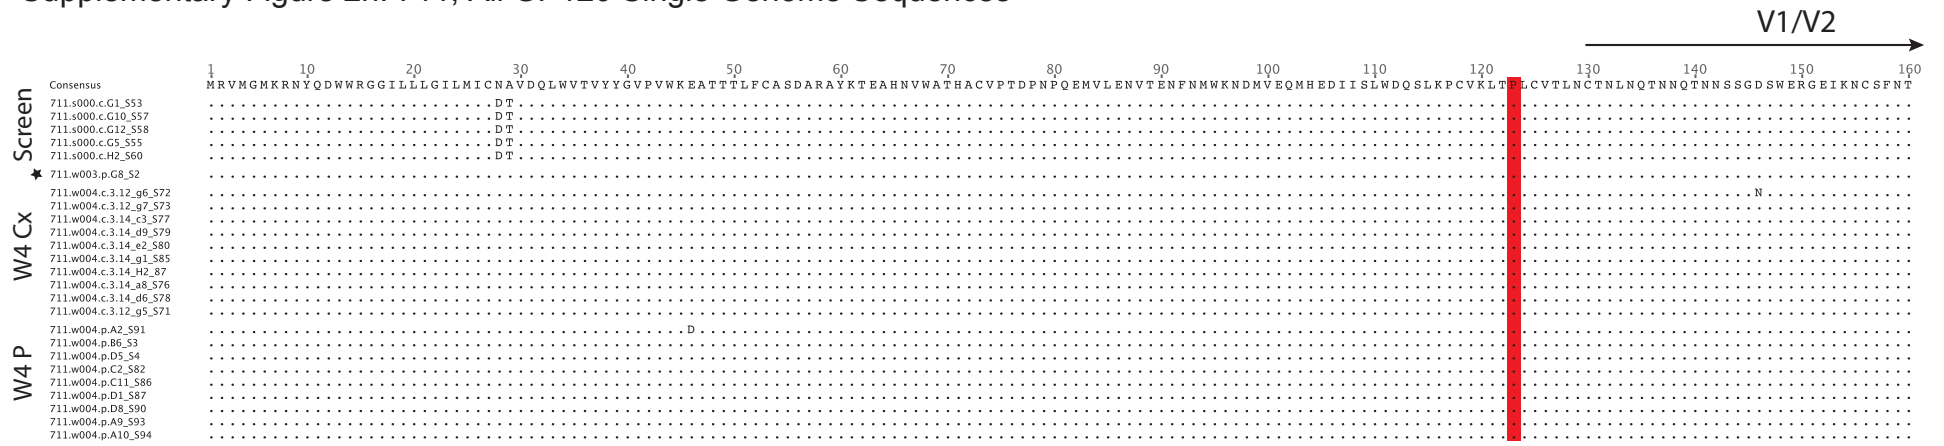

■ 3BNC117 Contacts

★ W3 P

Supplementary Figure 2h continued. 711, All GP120 Single Genome Sequences

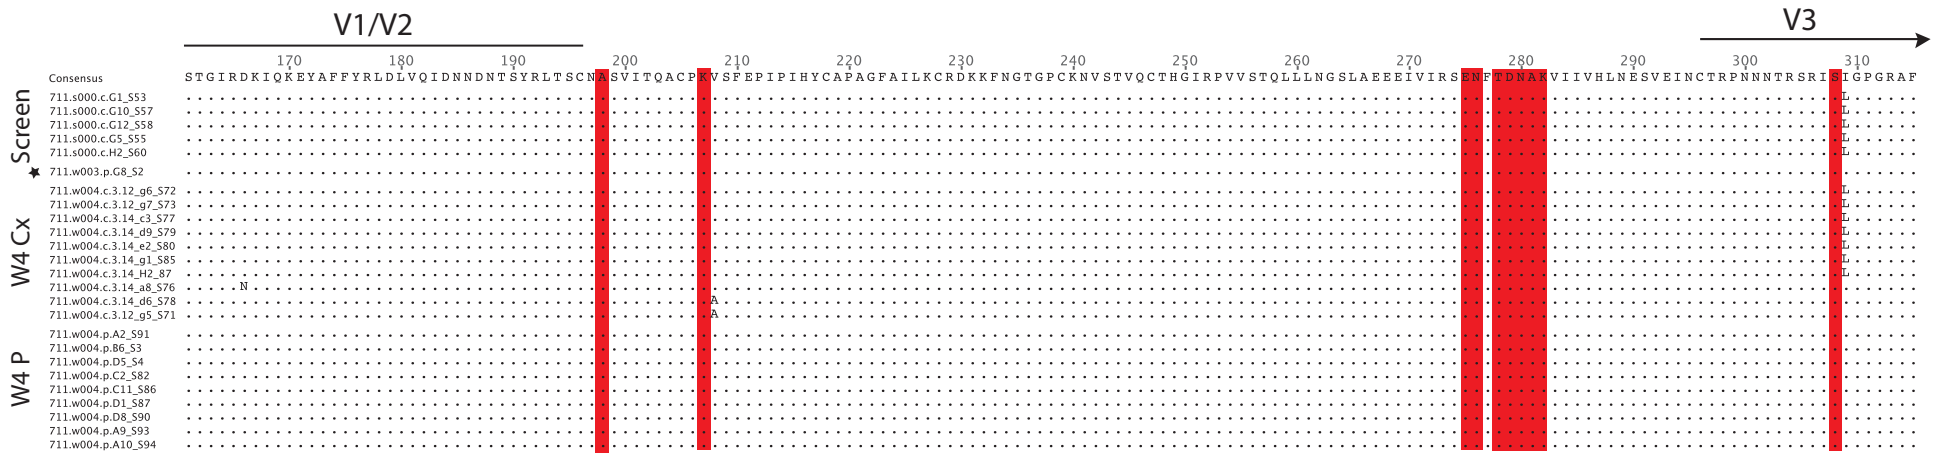

■ 3BNC117 Contacts

★ W3 P

Supplementary Figure 2h continued. 711, All GP120 Single Genome Sequences

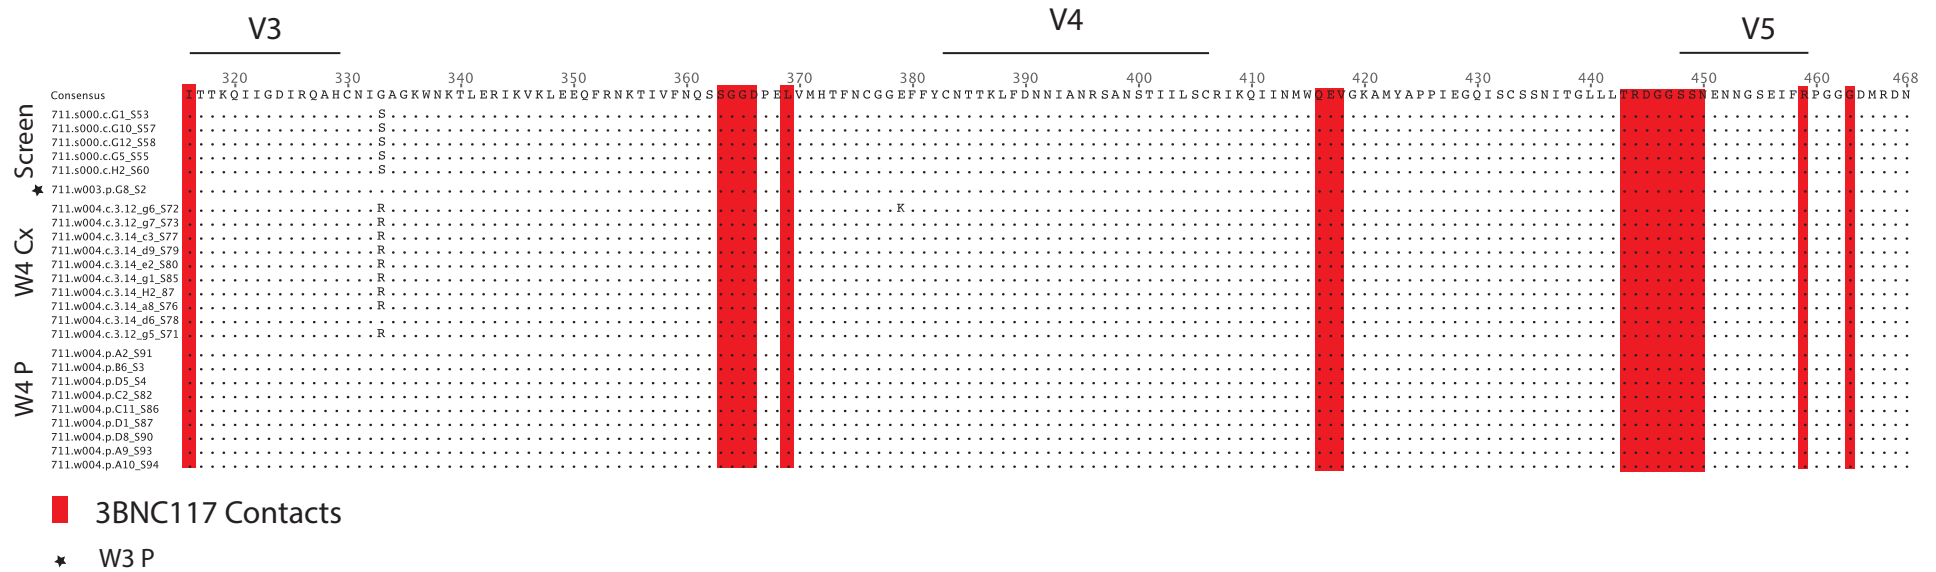

**Supplementary Figure 2. Alignment of gp120 Single Genome Sequences (SGSs) from Participants.** Sequences were aligned to individual participant consensus sequences for participants 701 (a), 702 (b), 703 (c), 704 (d), 707 (e), 708 (f), 709 (g) and 711 (h). Amino acids that differ from the consensus are indicated within individual sequences. All alignments were performed using the MUSCLE alignment tool in the Geneious software, version 8.1.3<sup>1</sup>. 3BNC117 contact sites are shaded in red<sup>2,3</sup>, and variable loops are indicated. Samples were obtained at screening, on Day 0 and at rebound time points as indicated (Fig. 2a and b).

Supplementary Table 1. Virus outgrowth culture neutralization screen.

| Subject ID | TCID50/ml   | Titer in TZM.bl cells (ug/ml) |        |         |        |        |        |        |        |        |       |        |        |
|------------|-------------|-------------------------------|--------|---------|--------|--------|--------|--------|--------|--------|-------|--------|--------|
|            |             | 3BNC117                       |        | 10-1074 |        | PG16   |        | G52K5  |        | VRC01  |       |        |        |
|            |             | < 2.0                         | IC50   | IC80    | IC50   | IC80   | IC50   | IC80   | IC50   | IC80   | < 2.0 | IC50   | IC80   |
| B69        | 267,184     |                               | 1.281  | 4.647   | 0.974  | 5.741  | >50    | >50    | 0.173  | 0.528  |       | 2.539  | 11.176 |
| B73        | 2,795       |                               | 0.102  | 0.288   | 0.024  | 0.084  | <0.023 | 0.077  | 2.122  | 7.431  |       | 0.716  | 2.325  |
| B74        | 69,877      |                               | 0.542  | 1.622   | 0.062  | 0.198  | <0.023 | <0.023 | 0.214  | 1.101  |       | 3.230  | 14.771 |
| B76        | 3,655       |                               | 2.331  | 8.516   | >50    | >50    | >50    | >50    | >50    | >50    |       | 13.855 | 41.714 |
| B77        | 456,878     |                               | 0.077  | 0.221   | 0.128  | 0.292  | 0.014  | 0.068  | 4.268  | 47.764 |       | ND     | ND     |
| B80        | 6,679,594   |                               | 0.248  | 0.908   | 0.126  | 0.366  | >50    | >50    | 0.372  | 2.098  |       | 1.204  | 4.354  |
| B82        | 91,376      |                               | 2.347  | 6.781   | 0.674  | 2.435  | 0.040  | 0.344  | 0.898  | 2.591  |       | >50    | >50    |
| B88        | 6,679,594   |                               | 0.904  | 3.111   | 3.551  | 23.522 | 4.533  | >50    | 0.501  | 1.429  |       | ND     | ND     |
| B89        | 39,493,845  |                               | 3.189  | 11.365  | 0.825  | 2.223  | 9.810  | >50    | 0.535  | 1.536  |       | ND     | ND     |
| B92        | 13,471,913  |                               | 6.625  | 27.427  | 0.658  | 1.768  | 0.012  | 0.106  | 0.294  | 1.085  |       | 12.663 | >50    |
| B93        | 1,335,919   |                               | >50    | >50     | 15.464 | >50    | 1.318  | >50    | 0.224  | 0.816  |       | >50    | >50    |
| B96        | 3,906,250   |                               | 0.415  | 1.116   | 0.096  | 0.268  | 0.721  | 45.948 | 1.006  | 5.829  |       | ND     | ND     |
| B98        | 2,284,389   |                               | 5.787  | 17.308  | 0.758  | 2.031  | 0.006  | 0.034  | 0.444  | 1.250  |       | 16.555 | 41.063 |
| B99        | 781,250     |                               | 0.387  | 1.430   | 0.330  | 0.919  | >50    | >50    | 0.172  | 0.624  |       | 2.034  | 5.404  |
| B100       | 69,877      |                               | 4.384  | 16.923  | 0.051  | 0.124  | 0.124  | >50    | 13.813 | >50    |       | ND     | ND     |
| B103       | 69,877      |                               | 0.138  | 0.645   | >50    | >50    | 0.001  | 0.005  | 2.103  | >50    |       | 1.199  | 9.020  |
| B104       | 31,250      |                               | 0.237  | 0.843   | >50    | >50    | 0.053  | 36.619 | 0.160  | 0.437  |       | 0.508  | 2.306  |
| B105       | 349,386     |                               | 13.994 | >50     | 0.537  | 1.816  | 0.022  | 0.324  | 1.731  | 5.835  |       | >50    | >50    |
| B106       | 349,386     |                               | 0.346  | 1.605   | 0.246  | 0.843  | 0.002  | 0.008  | 1.799  | 6.078  |       | 3.793  | 14.243 |
| B107       | 2,284,389   |                               | >50    | >50     | 0.732  | 2.024  | >50    | >50    | 0.630  | 1.686  |       | ND     | ND     |
| B109       | 349,386     |                               | 0.486  | 2.133   | 0.040  | 0.109  | >50    | >50    | 1.184  | 5.538  |       | 11.681 | 37.067 |
| B112       | 349,386     |                               | 0.355  | 1.206   | 0.299  | 0.982  | >50    | >50    | 0.900  | 2.980  |       | 2.204  | 5.904  |
| B114       | 349,386     |                               | 0.134  | 0.362   | >50    | >50    | 0.176  | 1.014  | 0.441  | 1.175  |       | ND     | ND     |
| B115       | 91,376      |                               | 1.462  | 2.634   | 0.197  | 0.690  | 0.015  | 0.033  | 1.118  | 3.595  |       | 7.465  | 17.297 |
| B116       | 1,746,928   |                               | 3.652  | 12.244  | 26.072 | >50    | 0.094  | 0.764  | >50    | >50    |       | 39.206 | >50    |
| B119       | 1,746,928   |                               | 0.525  | 2.418   | 0.089  | 0.410  | 6.672  | >50    | 2.400  | 11.247 |       | ND     | ND     |
| B123       | 18,275      |                               | 0.269  | 0.768   | 0.152  | 0.346  | 0.291  | 7.603  | 0.220  | 0.515  |       | 2.426  | 9.356  |
| B124       | 349,386     |                               | 0.772  | 2.572   | 0.198  | 0.675  | <0.001 | 0.003  | 0.519  | 1.422  |       | 9.378  | 38.331 |
| B125       | 85,449      |                               | 0.348  | 1.123   | 0.088  | 0.187  | 0.016  | 0.039  | 0.813  | 2.531  |       | ND     | ND     |
| B127       | 349,386     |                               | 0.857  | 7.362   | 0.043  | 0.101  | >50    | >50    | 0.292  | 1.072  |       | 4.826  | 13.040 |
| B129       | 1,746,928   |                               | 0.572  | 2.833   | 1.395  | 14.138 | 0.016  | 0.051  | >50    | >50    |       | ND     | ND     |
| B130       | 1,746,928   |                               | 1.989  | 5.285   | >50    | >50    | 0.027  | 0.303  | 0.515  | 1.714  |       | ND     | ND     |
| B133       | 1,579,754   |                               | 0.875  | 2.369   | 15.587 | >50    | 0.269  | 6.092  | >50    | >50    |       | 8.887  | 31.487 |
| B136       | 53,437      |                               | 0.181  | 0.502   | 0.010  | 0.039  | >50    | >50    | 0.229  | 0.771  |       | ND     | ND     |
| B139       | 1,746,928   |                               | 0.499  | 3.380   | 0.044  | 0.493  | 9.192  | >50    | 1.817  | 14.253 |       | ND     | ND     |
| B140       | 597,441     |                               | 0.239  | 1.032   | 0.175  | 0.739  | 0.004  | 0.014  | >50    | >50    |       | ND     | ND     |
| B142       | 2,795       |                               | >50    | >50     | 0.020  | 0.155  | ND     | ND     | ND     | ND     |       | ND     | ND     |
| B143       | 349,386     |                               | 0.488  | 1.595   | >50    | >50    | >50    | >50    | 2.002  | 13.490 |       | 16.550 | >50    |
| B144       | 156,250     |                               | 0.139  | 0.456   | 0.132  | 0.426  | 0.005  | 0.017  | 5.469  | 21.407 |       | 0.375  | 1.347  |
| B148       | 456,878     |                               | 1.142  | 3.043   | 0.521  | 1.373  | 0.014  | 0.087  | >50    | >50    |       | 3.905  | 10.345 |
| B149       | 1,132,637   |                               | 0.632  | 2.088   | 0.043  | 0.114  | >50    | >50    | >50    | >50    |       | 10.264 | 24.846 |
| B151       | 18,275      |                               | 0.075  | 0.368   | 0.025  | 0.086  | 0.004  | 0.010  | 0.141  | 0.474  |       | 0.066  | 0.317  |
| B152       | 69,877      |                               | 0.154  | 0.417   | 0.012  | 0.034  | 0.008  | 0.342  | 0.326  | 0.836  |       | 0.758  | 2.233  |
| B153       | 267,184     |                               | 1.170  | 4.099   | >50    | >50    | 1.572  | >50    | 0.277  | 0.724  |       | ND     | ND     |
| B155       | 5,663,186   |                               | 2.725  | 7.564   | >50    | >50    | 14.735 | >50    | >50    | >50    |       | 5.477  | 21.327 |
| B156       | 31,250      |                               | >50    | >50     | ND     | ND     | ND     | ND     | ND     | ND     |       | 5.835  | 17.435 |
| B161       | 69,877      |                               | 0.158  | 0.538   | 0.500  | 3.408  | 0.103  | 4.989  | 3.356  | 12.404 |       | 1.443  | 5.019  |
| B164       | 69,877      |                               | 0.486  | 1.620   | 0.459  | 1.461  | 0.240  | 11.974 | 0.186  | 0.462  |       | 6.793  | 27.406 |
| B165       | 156,250     |                               | 0.385  | 0.750   | ND     | ND     | ND     | ND     | ND     | ND     |       | 2.118  | 9.272  |
| B166       | 69,877      |                               | 0.185  | 0.404   | ND     | ND     | ND     | ND     | ND     | ND     |       | 0.897  | 3.350  |
| B167       | 91,376      |                               | >50    | >50     | 0.489  | 2.574  | 3.220  | >50    | 0.214  | 0.576  |       | ND     | ND     |
| B168       | 53,437      |                               | 35.349 | >50     | 0.280  | 0.745  | 0.007  | 0.019  | 0.299  | 1.000  |       | >50    | >50    |
| B169       | 91,376      |                               | 4.989  | 15.443  | >50    | >50    | 0.008  | 0.069  | >50    | >50    |       | ND     | ND     |
| B175       | 349,386     |                               | 0.291  | 0.810   | ND     | ND     | ND     | ND     | ND     | ND     |       | 3.525  | 13.023 |
| B177       | 456,878     |                               | 12.387 | >50     | ND     | ND     | ND     | ND     | ND     | ND     |       | 6.912  | 20.223 |
| B183       | 13,975      |                               | 15.489 | >50     | 0.021  | 0.056  | >50    | >50    | >50    | >50    |       | ND     | ND     |
| B184       | 6,250       |                               | 0.187  | 0.667   | 0.043  | 0.118  | 0.202  | >20    | >20    | >20    |       | 0.761  | 2.378  |
| B185       | 156,250     |                               | 1.839  | 5.152   | ND     | ND     | ND     | ND     | ND     | ND     |       | 29.538 | >50    |
| B191       | 349,386     |                               | 2.508  | 7.031   | ND     | ND     | ND     | ND     | ND     | ND     |       | 4.038  | 22.995 |
| B193       | 10,687      |                               | 12.007 | >50     | ND     | ND     | ND     | ND     | ND     | ND     |       | >50    | >50    |
| B194       | 91,376      |                               | 0.370  | 0.998   | ND     | ND     | ND     | ND     | ND     | ND     |       | ND     | ND     |
| B195       | 69,877      |                               | 11.939 | 28.190  | ND     | ND     | ND     | ND     | ND     | ND     |       | 18.174 | >50    |
| B196       | 349,386     |                               | >50    | >50     | ND     | ND     | ND     | ND     | ND     | ND     |       | 0.894  | 4.257  |
| B197       | 5,108,049   |                               | 3.031  | 9.205   | ND     | ND     | ND     | ND     | ND     | ND     |       | 4.455  | 16.567 |
| B199       | 2,284,389   |                               | 3.206  | 8.671   | ND     | ND     | ND     | ND     | ND     | ND     |       | 22.494 | >50    |
| B200       | 781,250     |                               | 0.411  | 0.790   | 0.081  | 0.181  | 1.677  | >20    | >20    | >20    |       | 16.690 | 48.076 |
| B211       | 781,250     |                               | >20    | >20     | 0.402  | 2.413  | >20    | >20    | >20    | >20    |       | 1.999  | 7.921  |
| B212       | 69,877      |                               | 0.655  | 2.207   | 0.390  | 1.304  | 1.504  | >20    | 0.332  | 1.112  |       | 22.229 | >50    |
| B214       | 69,877      |                               | 0.941  | 2.424   | 0.130  | 0.598  | 0.071  | 1.454  | 0.257  | 0.859  |       | 3.615  | 8.300  |
| B219       | 13,975      |                               | 0.417  | 1.099   | 1.257  | >20    | 7.569  | >20    | 0.718  | >20    |       | ND     | ND     |
| B220       | 31,250      |                               | 3.423  | 10.461  | 0.083  | 0.222  | >20    | >20    | 0.796  | 3.767  |       | ND     | ND     |
| B221       | 18,275      |                               | 0.641  | 2.913   | 0.072  | 0.241  | 0.003  | 0.008  | >20    | >20    |       | 1.918  | 7.202  |
| B224       | 226,527     |                               | 0.385  | 1.301   | 0.022  | 0.061  | 0.007  | 0.028  | 0.543  | 4.403  |       | 0.637  | 3.417  |
| B226       | 1,746,928   |                               | 6.001  | >20     | 0.198  | 0.443  | 0.011  | 0.036  | 1.149  | 4.489  |       | 23.098 | >50    |
| B228       | 91,376      |                               | >20    | >20     | 0.084  | 0.293  | 0.003  | 0.029  | >20    | >20    |       | >50    | >50    |
| B229       | 597,441     |                               | 0.271  | 2.094   | 0.021  | 0.056  | ND     | ND     | ND     | ND     |       | 0.648  | 3.395  |
| B236       | 10,687      |                               | 0.735  | 2.532   | 0.320  | 1.105  | 0.010  | 0.038  | >20    | >20    |       | 4.646  | 20.046 |
| B244       | 53,437      |                               | 0.315  | 1.063   | 1.174  | 4.106  | 13.120 | >20    | 0.512  | 1.490  |       | 1.726  | 5.295  |
| B248       | 781,250     |                               | >20    | >20     | 0.355  | 0.981  | >20    | >20    | >20    | >20    |       | >50    | >50    |
| B254       | 53,437      |                               | 0.324  | 1.091   | 0.028  | 0.122  | 2.800  | >20    | 0.459  | 1.779  |       | 1.049  | 3.644  |
| B258       | 556,278     |                               | 1.385  | 5.319   | 0.816  | 3.346  | 0.005  | 0.018  | 0.197  | 0.793  |       | 8.095  | 23.494 |
| B261       | 33,397,968  |                               | 3.162  | 10.403  | >50    | >50    | ND     | ND     | ND     | ND     |       | 9.516  | 29.529 |
| B266       | 33,397,968  |                               | 0.927  | 3.324   | 0.399  | 1.395  | 0.366  | >20    | 10.475 | >20    |       | 5.548  | 17.350 |
| B277       | 13,975      |                               | 0.513  | >50     | 2.736  | 7.640  | ND     | ND     | ND     | ND     |       | ND     | ND     |
| B283       | 53,437      |                               | 9.211  | >50     | 0.370  | 1.577  | ND     | ND     | ND     | ND     |       | ND     | ND     |
| B289       | 285,548,607 |                               | 0.768  | 3.765   | 4.171  | 41.812 | ND     | ND     | ND     | ND     |       | 5.652  | 20.323 |
| B296       | 156,250     |                               | 0.136  | 0.301   | 1.164  | 3.092  | ND     | ND     | ND     | ND     |       | ND     | ND     |
| B297       | 6,679,594   |                               | 0.266  | 0.986   | 0.415  | 1.580  | ND     | ND     | ND     | ND     |       | 1.438  | 6.770  |

Supplementary Table 1. Virus outgrowth culture neutralization screen. IC50 and IC80 neutralization titers from Tzm-bl assays of screening virus outgrowth culture supernatants against antibodies 3BNC117<sup>4</sup>, 10-1074<sup>5</sup>, PG16<sup>6</sup>, G52K5<sup>7</sup> and VRC01<sup>8</sup>. Color indicates antibody titer (low to high, red to green). For 3BNC117 and VRC01, participants satisfying our screen-in criterion of a culture IC50 < 2.0 µg/ml are denoted by bright red boxes. ND, not determined.

Supplementary Table 2. Participants demographic and baseline clinical characteristics.

| Study ID       | Age (yrs)   | Gender | Race         | Year of HIV diagnosis | Years since HIV diagnosis | Year ART started | Years on ART | CD4 nadir    | 3BNC117 IC50 of outgrowth culture (µg/ml) | ART regimen at enrollment* | Months VL <50 cp/ml | Switched ART regimen* | Clade | CD4 count on day 0 | # of 3BNC117 Infusions | Weeks to VL >50 cp/ml | Weeks to VL >75 cp/ml | Weeks to VL >200 cp/ml |
|----------------|-------------|--------|--------------|-----------------------|---------------------------|------------------|--------------|--------------|-------------------------------------------|----------------------------|---------------------|-----------------------|-------|--------------------|------------------------|-----------------------|-----------------------|------------------------|
| <b>Group A</b> |             |        |              |                       |                           |                  |              |              |                                           |                            |                     |                       |       |                    |                        |                       |                       |                        |
| 701            | 62          | M      | Black        | 1999                  | 16                        | 1999             | 16           | 209          | 0.077                                     | RAL/TDF/FTC                | >12                 | -                     | B     | 638                | 2                      | 6                     | 6                     | 6                      |
| 702            | 26          | M      | White/hisp   | 2011                  | 4                         | 2011             | 4            | 310          | 0.248                                     | EVG/Cobi/TDF/FTC           | >12                 | -                     | B     | 720                | 2                      | 5                     | 5                     | 5                      |
| 703            | 41          | M      | White/hisp   | 1997                  | 18                        | 1997             | 18           | 500          | 0.572                                     | EVG/Cobi/TDF/FTC           | >12                 | -                     | B     | 689                | 2                      | 5                     | 5                     | 5                      |
| 704            | 29          | M      | Black        | 2009                  | 6                         | 2010             | 5            | 400          | 0.239                                     | RPV/TDF/FTC                | >12                 | DTG/TDF/FTC           | B     | 761                | 2                      | 5                     | 5                     | 6                      |
| 707            | 50          | M      | White        | 1988                  | 27                        | 2004             | 11           | 500          | 1.989                                     | NVP/TDF/FTC                | >12                 | DTG/TDF/FTC           | B     | 779                | 2                      | 8                     | 9                     | 9                      |
| 708            | 43          | M      | White        | 2002                  | 13                        | 2003             | 12           | 280          | 0.37                                      | EVG/Cobi/TDF/FTC           | >12                 | -                     | B     | 958                | 2                      | 8                     | 8                     | 9                      |
| <b>Mean</b>    | <b>41.8</b> |        |              |                       | <b>14.0</b>               |                  | <b>11.0</b>  | <b>366.5</b> | <b>0.6</b>                                |                            |                     |                       |       | <b>757.5</b>       |                        | <b>6.2</b>            | <b>6.3</b>            | <b>6.7</b>             |
| 705**          | 61          | M      | Black        | 1989                  | 26                        | early 1990s      | about 25     | 400s         | 0.904                                     | RAL/DRV/r/TDF/FTC          | >12                 | -                     | B     | 713                | NA                     | NA                    | NA                    | NA                     |
| 706**          | 60          | M      | White        | 2003                  | 12                        | 2009             | 6            | 200          | 0.499                                     | RAL/TDF/FTC                | >12                 | -                     | B     | 592                | NA                     | NA                    | NA                    | NA                     |
| <b>Group B</b> |             |        |              |                       |                           |                  |              |              |                                           |                            |                     |                       |       |                    |                        |                       |                       |                        |
| 709            | 44          | M      | Pac Islander | 2003                  | 12                        | 2003             | 12           | 800          | 0.941                                     | LPV/r/TDF/FTC              | >12                 | -                     | B     | 1031               | 3                      | 5                     | 5                     | 5                      |
| 710            | 31          | M      | Black        | 2012                  | 3                         | 2014             | 1            | 500          | 0.187                                     | RPV/TDF/FTC                | >12                 | DTG/TDF/FTC           | B     | 928                | 4                      | 18                    | 19                    | 19                     |
| 711            | 30          | M      | Black        | 2014                  | 1                         | 2014             | 1            | 637          | 0.075                                     | ATV/r/TDF/FTC              | >12                 | -                     | B     | 1000               | 2                      | 3                     | 3                     | 3                      |
| 712            | 57          | F      | Black        | 2004                  | 11                        | 2009             | 6            | 277          | 0.315                                     | EFV/TDF/FTC                | >12                 | DTG/TDF/FTC           | B     | 597                | 4                      | 15                    | 15                    | 16                     |
| 713            | 31          | M      | Black        | 2003                  | 12                        | 2014             | 1            | 500          | 0.417                                     | EVG/cobi/TDF/FTC           | >12                 | -                     | B     | 358                | 3                      | 5                     | 5                     | 5                      |
| 714            | 28          | M      | White        | 2013                  | 2                         | 2014             | 1            | 420          | 0.385                                     | RPV/TDF/FTC                | >12                 | DTG/TDF/FTC           | B     | 590                | 4                      | 9                     | 9                     | 10                     |
| 715            | 27          | M      | Black        | 2008                  | 7                         | 2008             | 7            | 390          | 0.346                                     | RPV/TDF/FTC                | >12                 | DTG/TDF/FTC           | B     | 667                | 4                      | 11                    | 11                    | 11                     |
| <b>Mean</b>    | <b>35.4</b> |        |              |                       | <b>6.9</b>                |                  | <b>4.1</b>   | <b>541.2</b> | <b>0.4</b>                                |                            |                     |                       |       | <b>738.7</b>       |                        | <b>9.4</b>            | <b>9.6</b>            | <b>9.9</b>             |

\*<sup>1</sup>NNRTI based regimens were switched four weeks before HAART interruption due to longer half lives of NNRTIs

\*\* Participants 705 and 706's (baseline) day 0 HIV-1 RNA levels were 8,730 and 50 copies/ml, respectively. These participants were not included in the analysis given lack of viral suppression at baseline, but safety data was collected.

**Supplementary Table 2. Participants demographic and baseline clinical characteristics.** RAL-raltegravir, DTG-dolutegravir, FTC-emtricitabine, TDF-tenofovir disoproxil fumarate, EVG-elvitegravir, Cobi-Cobicistat, RPV-Rilpivirine, NVP-Nevirapine, DRV-Darunavir, RTV-Ritonavir.



Supplementary Table 3. Viral outgrowth culture neutralization of study participants.

| 701            | 3BNC117          | 10-1074          | PG16             | G52K5            | 709            | 3BNC117          | 10-1074          | PG16             | G52K5            |
|----------------|------------------|------------------|------------------|------------------|----------------|------------------|------------------|------------------|------------------|
| <b>Culture</b> | <b>IC50 IC80</b> | <b>IC50 IC80</b> | <b>IC50 IC80</b> | <b>IC50 IC80</b> | <b>Culture</b> | <b>IC50 IC80</b> | <b>IC50 IC80</b> | <b>IC50 IC80</b> | <b>IC50 IC80</b> |
| Screen         | 0.077 0.221      | 0.128 0.292      | 0.014 0.068      | 4.268 47.764     | Screen         | 0.941 2.424      | 0.130 0.598      | 0.071 1.454      | 0.257 0.859      |
| Day 0          | 0.208 0.545      | 0.354 0.749      | 0.013 0.034      | 7.498 >20        | Day 0 A        | 1.165 4.111      | 0.100 2.097      | ND ND            | ND ND            |
| Wk6            | 0.147 0.720      | 0.069 0.155      | 0.005 0.016      | 7.078 >20        | Day 0 C        | 1.214 4.022      | >50 >50          | ND ND            | ND ND            |
| Wk7            | 0.801 41.036     | 0.054 0.260      | 0.003 0.015      | >20 >20          | Wk6 A          | 4.615 47.525     | 0.271 5.531      | ND ND            | ND ND            |
| Wk10           | 3.040 >20        | 0.067 0.192      | 0.004 0.014      | >20 >20          | Wk6 B          | 6.477 >50        | 0.207 8.213      | ND ND            | ND ND            |
| Wk12           | 0.076 0.300      | 0.213 0.500      | 0.106 16.544     | >20 >20          | Wk6 C          | 7.261 >50        | 0.401 4.016      | ND ND            | ND ND            |
| Wk14 A         | 0.001 0.017      | 0.056 0.209      | ND ND            | ND ND            |                |                  |                  |                  |                  |
| Wk14 B         | 0.121 0.404      | 0.184 0.602      | ND ND            | ND ND            |                |                  |                  |                  |                  |
| Wk14 C         | 0.507 2.143      | 0.028 0.135      | ND ND            | ND ND            |                |                  |                  |                  |                  |
| <b>702</b>     | <b>3BNC117</b>   | <b>10-1074</b>   | <b>PG16</b>      | <b>G52K5</b>     | <b>710</b>     | <b>3BNC117</b>   | <b>10-1074</b>   | <b>PG16</b>      | <b>G52K5</b>     |
| <b>Culture</b> | <b>IC50 IC80</b> | <b>IC50 IC80</b> | <b>IC50 IC80</b> | <b>IC50 IC80</b> | <b>Culture</b> | <b>IC50 IC80</b> | <b>IC50 IC80</b> | <b>IC50 IC80</b> | <b>IC50 IC80</b> |
| Screen         | 0.248 0.908      | 0.126 0.366      | >50 >50          | 0.372 2.098      | Screen         | 0.187 0.667      | 0.043 0.118      | 0.202 >20        | >20 >20          |
| Day 0          | 0.640 1.781      | 0.230 0.516      | >20 >20          | >20 >20          | Wk19           | 0.438 1.327      | 0.126 0.284      | 2.302 >50        | >50 >50          |
| Wk5            | 2.082 7.632      | 0.229 0.658      | 1.118 >20        | 1.296 5.443      | Wk20           | 0.495 2.116      | 0.196 0.427      | 6.043 >50        | >50 >50          |
| Wk6            | 2.441 8.767      | 0.229 0.644      | 0.929 >20        | 0.742 5.226      |                |                  |                  |                  |                  |
| Wk9            | 1.759 8.586      | 0.229 0.597      | 0.485 >20        | 0.895 5.318      |                |                  |                  |                  |                  |
| Wk11           | 2.191 6.573      | 0.382 0.857      | 1.393 >20        | 0.825 5.832      |                |                  |                  |                  |                  |
| Wk14 B         | 1.771 6.186      | 0.187 0.643      | ND ND            | ND ND            |                |                  |                  |                  |                  |
| Wk14 C         | 0.568 1.549      | 0.431 1.262      | ND ND            | ND ND            |                |                  |                  |                  |                  |
| <b>703</b>     | <b>3BNC117</b>   | <b>10-1074</b>   | <b>PG16</b>      | <b>G52K5</b>     | <b>711</b>     | <b>3BNC117</b>   | <b>10-1074</b>   | <b>PG16</b>      | <b>G52K5</b>     |
| <b>Culture</b> | <b>IC50 IC80</b> | <b>IC50 IC80</b> | <b>IC50 IC80</b> | <b>IC50 IC80</b> | <b>Culture</b> | <b>IC50 IC80</b> | <b>IC50 IC80</b> | <b>IC50 IC80</b> | <b>IC50 IC80</b> |
| Screen         | 0.572 2.833      | 1.395 14.138     | 0.016 0.051      | >50 >50          | Screen         | 0.075 0.368      | 0.025 0.086      | 0.004 0.010      | 0.141 0.474      |
| Day 0          | ND ND            | ND ND            | ND ND            | ND ND            | Day 0          | 0.150 2.099      | 0.024 0.095      | ND ND            | ND ND            |
| Wk6            | 2.659 20.019     | 2.419 >20        | 0.007 0.033      | 7.098 >20        | Wk4 A          | 0.087 0.935      | >50 >50          | ND ND            | ND ND            |
| Wk11           | 1.561 4.217      | >20 >20          | 0.011 0.048      | 0.753 2.587      | Wk4 B          | 0.150 1.137      | >50 >50          | ND ND            | ND ND            |
|                |                  |                  |                  |                  | Wk4 C          | 0.169 1.520      | >50 >50          | ND ND            | ND ND            |
| <b>704</b>     | <b>3BNC117</b>   | <b>10-1074</b>   | <b>PG16</b>      | <b>G52K5</b>     | <b>712</b>     | <b>3BNC117</b>   | <b>10-1074</b>   | <b>PG16</b>      | <b>G52K5</b>     |
| <b>Culture</b> | <b>IC50 IC80</b> | <b>IC50 IC80</b> | <b>IC50 IC80</b> | <b>IC50 IC80</b> | <b>Culture</b> | <b>IC50 IC80</b> | <b>IC50 IC80</b> | <b>IC50 IC80</b> | <b>IC50 IC80</b> |
| Screen         | 0.239 1.032      | 0.175 0.739      | 0.004 0.014      | >50 >50          | Screen         | 0.315 1.063      | 1.174 4.106      | 13.120 >20       | 0.512 1.490      |
| D0             | 0.195 0.557      | 0.223 0.625      | 0.014 0.062      | >20 >20          | Wk12           | 0.657 1.785      | 2.095 4.427      | 2.777 >50        | 0.317 0.727      |
| Wk5            | 4.268 >20        | 0.131 0.352      | 0.061 0.351      | >20 >20          |                |                  |                  |                  |                  |
| Wk6            | 4.184 >20        | 0.125 0.42       | 0.069 0.573      | >20 >20          |                |                  |                  |                  |                  |
| Wk12           | 0.269 0.906      | 0.280 0.778      | 0.013 0.054      | >20 >20          |                |                  |                  |                  |                  |
| Wk14 B         | 15.495 >50       | 0.093 0.340      | ND ND            | ND ND            |                |                  |                  |                  |                  |
| Wk14 C         | 0.378 1.616      | 0.206 0.895      | ND ND            | ND ND            |                |                  |                  |                  |                  |
| <b>707</b>     | <b>3BNC117</b>   | <b>10-1074</b>   | <b>PG16</b>      | <b>G52K5</b>     | <b>713</b>     | <b>3BNC117</b>   | <b>10-1074</b>   | <b>PG16</b>      | <b>G52K5</b>     |
| <b>Culture</b> | <b>IC50 IC80</b> | <b>IC50 IC80</b> | <b>IC50 IC80</b> | <b>IC50 IC80</b> | <b>Culture</b> | <b>IC50 IC80</b> | <b>IC50 IC80</b> | <b>IC50 IC80</b> | <b>IC50 IC80</b> |
| Screen         | 1.989 5.285      | >50 >50          | 0.027 0.303      | 0.515 1.714      | Screen         | 0.417 1.099      | 1.257 >20        | 7.569 >20        | 0.718 >20        |
| Day 0          | 2.004 >20        | >20 >20          | 0.028 >20        | 0.663 7.37       | Wk6            | 45.053 >50       | >50 >50          | 0.021 0.155      | 46.969 >50       |
| Wk10           | 1.577 4.561      | >20 >20          | 0.024 0.172      | 0.860 2.482      |                |                  |                  |                  |                  |
| Wk12           | ND ND            | ND ND            | ND ND            | ND ND            |                |                  |                  |                  |                  |
| Wk14 B         | 1.967 6.530      | >50 >50          | ND ND            | ND ND            |                |                  |                  |                  |                  |
| <b>708</b>     | <b>3BNC117</b>   | <b>10-1074</b>   | <b>PG16</b>      | <b>G52K5</b>     | <b>714</b>     | <b>3BNC117</b>   | <b>10-1074</b>   | <b>PG16</b>      | <b>G52K5</b>     |
| <b>Culture</b> | <b>IC50 IC80</b> | <b>IC50 IC80</b> | <b>IC50 IC80</b> | <b>IC50 IC80</b> | <b>Culture</b> | <b>IC50 IC80</b> | <b>IC50 IC80</b> | <b>IC50 IC80</b> | <b>IC50 IC80</b> |
| Screen         | 0.370 0.998      | ND ND            | 0.076 >20        | >20 >20          | Screen         | 0.385 1.301      | 0.022 0.061      | 0.007 0.028      | 0.543 4.403      |
| Day 0          | 0.143 0.695      | 0.116 0.447      | ND ND            | ND ND            | Wk10           | 7.624 21.761     | 0.056 0.151      | 0.020 0.250      | 0.638 2.229      |
| Wk9 #8         | 0.074 0.274      | 0.083 0.452      | ND ND            | ND ND            |                |                  |                  |                  |                  |
| Wk9 #9         | >50 >50          | 0.017 0.114      | ND ND            | ND ND            |                |                  |                  |                  |                  |
| Wk10 #4        | >50 >50          | 0.021 0.176      | ND ND            | ND ND            |                |                  |                  |                  |                  |
| Wk10 #5        | >50 >50          | 0.038 0.144      | ND ND            | ND ND            |                |                  |                  |                  |                  |
| Wk10           | >20 >20          | 0.142 0.661      | 0.004 0.020      | >20 >20          |                |                  |                  |                  |                  |
| Wk12           | 0.379 2.051      | 0.052 0.231      | 0.022 0.171      | >20 >20          |                |                  |                  |                  |                  |
| <b>715</b>     | <b>3BNC117</b>   | <b>10-1074</b>   | <b>PG16</b>      | <b>G52K5</b>     | <b>715</b>     | <b>3BNC117</b>   | <b>10-1074</b>   | <b>PG16</b>      | <b>G52K5</b>     |
| <b>Culture</b> | <b>IC50 IC80</b> | <b>IC50 IC80</b> | <b>IC50 IC80</b> | <b>IC50 IC80</b> | <b>Culture</b> | <b>IC50 IC80</b> | <b>IC50 IC80</b> | <b>IC50 IC80</b> | <b>IC50 IC80</b> |
| Screen         | 0.346 1.605      | 0.246 0.843      | 0.002 0.008      | 1.799 6.078      | Screen         | 0.346 1.605      | 0.246 0.843      | 0.002 0.008      | 1.799 6.078      |
| Wk11           | 0.208 0.537      | 0.232 0.498      | 0.005 0.034      | 0.765 1.990      | Wk11           | 0.208 0.537      | 0.232 0.498      | 0.005 0.034      | 0.765 1.990      |

Supplementary Table 3. Viral Outgrowth Culture Neutralization by 3BNC117 and other bNAb. IC50 and IC80 neutralization titers from Tzm-bl assays of study participant viral outgrowth culture supernatants against antibodies 3BNC117<sup>4</sup>, 10-1074<sup>5</sup>, PG16<sup>6</sup> and G52K5<sup>7</sup>. Color indicates antibody titer (low to high, red to green). Wk-study week, ND-not determined.

Supplementary Table 4. Laboratory values for Study Participants.

a

| 701    | CD4 abs<br>(cells/mm <sup>3</sup> ) | CD4 % | CD8 abs<br>(cells/mm <sup>3</sup> ) | CD8 % | VL<br>(copies/ml) | 3BNC117<br>(ug/ml) |
|--------|-------------------------------------|-------|-------------------------------------|-------|-------------------|--------------------|
| Screen | 836                                 | 38    | 964                                 | 44    | <20D              |                    |
| Day 0  | 638                                 | 42.5  | 647                                 | 43.1  | <20ND             | 0                  |
| Day 1  |                                     |       |                                     |       |                   | 207.4              |
| Wk 1   |                                     |       |                                     |       | <20D              | 77.65              |
| Wk 2   | 690                                 | 36.3  | 870                                 | 45.8  | <20D              | 52.2               |
| Wk 3   | 703                                 | 37    | 865                                 | 45.5  | 30                | 35.15              |
| Day 22 |                                     |       |                                     |       |                   | 194.7              |
| Wk 4   | 714                                 | 35.7  | 906                                 | 45.3  | <20ND             | 105.3              |
| Wk 5   |                                     |       |                                     |       | <20D              | 71.85              |
| Wk 6   | 607                                 | 33.7  | 796                                 | 44.2  | 1,586             | 48.15              |
| Wk 7   |                                     |       |                                     |       | 99,600            | 35.75              |
| Wk 8   | 669                                 | 30.4  | 1188                                | 54    | 4,070             | 24.3               |
| Wk 9   |                                     |       |                                     |       | 340               | 17.25              |
| Wk 10  | 504                                 | 33.6  | 1025                                | 46.6  | 50                | 13.16              |
| Wk 11  |                                     |       |                                     |       | 30                | 9.85               |
| Wk 12  | 623                                 | 34.6  | 799                                 | 44.4  | <20ND             | 7.93               |
| Wk 14  | 627                                 | 36.9  | 743                                 | 43.7  | <20D              | 4.35               |
| Wk 24  |                                     |       |                                     |       | <20ND             | <0.50              |
| Wk 36  | 632                                 | 39.5  | 669                                 | 41.8  | <20ND             | <0.50              |

| 702    | CD4 abs<br>(cells/mm <sup>3</sup> ) | CD4 % | CD8 abs<br>(cells/mm <sup>3</sup> ) | CD8 % | VL<br>(copies/ml) | 3BNC117<br>(ug/ml) |
|--------|-------------------------------------|-------|-------------------------------------|-------|-------------------|--------------------|
| Screen | 668                                 | 32    | 907                                 | 43    | <20D              |                    |
| Day 0  | 720                                 | 37.9  | 775                                 | 40.8  | <20ND             | 0                  |
| Day 1  |                                     |       |                                     |       |                   | 213.4              |
| Wk 1   |                                     |       |                                     |       | <20D              | 99.5               |
| Wk 2   | 568                                 | 29.9  | 808                                 | 42.5  | <20D              | 55.35              |
| Wk 3   | 579                                 | 36.2  | 613                                 | 38.3  | 40                | 32.3               |
| Day 22 |                                     |       |                                     |       |                   | 312.3              |
| Wk 4   | 513                                 | 34.2  | 630                                 | 42    | <20ND             | 118.1              |
| Wk 5   |                                     |       |                                     |       | 650               | 66.55              |
| Wk 6   | 492                                 | 25.9  | 882                                 | 46.5  | 7,910             | 45.65              |
| Wk 7   |                                     |       |                                     |       | 1,020             | 18.27              |
| Wk 8   | 521                                 | 27.4  | 889                                 | 46.8  | 120               | 20.67              |
| Wk 9   |                                     |       |                                     |       | 20                | 13.99              |
| Wk 10  | 680                                 | 30.9  | 972                                 | 44.2  | 20                | 11                 |
| Wk 11  |                                     |       |                                     |       | <20D              | 7.38               |
| Wk 12  | 477                                 | 29.8  | 688                                 | 43    | <20D              | 5.34               |
| Wk 14  | 539                                 | 24.5  | 1036                                | 47    | <20D              | 2.21               |
| Wk 24  |                                     |       |                                     |       | <20ND             | <0.50              |
| Wk 36  | 624                                 | 31.2  | 802                                 | 40.1  | <20ND             | <0.50              |

| 703    | CD4 abs<br>(cells/mm <sup>3</sup> ) | CD4 % | CD8 abs<br>(cells/mm <sup>3</sup> ) | CD8 % | VL<br>(copies/ml) | 3BNC117<br>(ug/ml) |
|--------|-------------------------------------|-------|-------------------------------------|-------|-------------------|--------------------|
| Screen | 1104                                | 36    | 1243                                | 40    | <20ND             |                    |
| Day 0  | 689                                 | 32.8  | 928                                 | 44.2  | <20ND             | 0                  |
| Day 1  |                                     |       |                                     |       |                   | 330.4              |
| Wk 1   |                                     |       |                                     |       | <20ND             | 146.35             |
| Wk 2   | 1240                                | 33.5  | 1654                                | 44.7  | <20ND             | 88.95              |
| Wk 3   | 924                                 | 33    | 1310                                | 46.8  | <20D              | 53.1               |
| Day 22 |                                     |       |                                     |       |                   | 290.9              |
| Wk 4   | 963                                 | 32.1  | 1278                                | 42.6  | 40                | 120.95             |
| Wk 5   |                                     |       |                                     |       | 360               | 123.3              |
| Wk 6   | 633                                 | 33.3  | 804                                 | 42.3  | 8,490             | 104.1              |
| Wk 7   |                                     |       |                                     |       | 1,900             | 61.25              |
| Wk 8   | 1040                                | 28.9  | 1663                                | 46.2  | <20D              | 37.85              |
| Wk 9   |                                     |       |                                     |       | <20ND             | 25.05              |
| Wk 10  | 808                                 | 32.3  | 1105                                | 44.2  | <20ND             | 18.5               |
| Wk 11  |                                     |       |                                     |       | <20ND             | 10.5               |
| Wk 12  | 1163                                | 32.3  | 1685                                | 46.8  | <20ND             | 12.91              |
| Wk 14  | 696                                 | 29    | 1106                                | 46.1  | <20ND             | 7.7                |
| Wk 24  |                                     |       |                                     |       | <20ND             | <0.50              |
| Wk 36  | 826                                 | 30.6  | 1153                                | 42.7  | <20ND             | <0.50              |

| 704    | CD4 abs<br>(cells/mm <sup>3</sup> ) | CD4 % | CD8 abs<br>(cells/mm <sup>3</sup> ) | CD8 % | VL<br>(copies/ml) | 3BNC117<br>(ug/ml) |
|--------|-------------------------------------|-------|-------------------------------------|-------|-------------------|--------------------|
| Screen | 621                                 | 39    | 523                                 | 33    | <20ND             |                    |
| Day 0  | 761                                 | 42.3  | 589                                 | 32.7  | <20ND             | 0                  |
| Day 1  |                                     |       |                                     |       |                   | 319                |
| Wk 1   |                                     |       |                                     |       | <20ND             | 98.9               |
| Wk 2   | 707                                 | 37.2  | 570                                 | 30    | <20D              | 82.45              |
| Wk 3   | 581                                 | 44.7  | 361                                 | 27.8  | <20D              | 58.3               |
| Day 22 |                                     |       |                                     |       |                   | 338.7              |
| Wk 4   | 645                                 | 40.3  | 478                                 | 29.9  | <20D              | 148.15             |
| Wk 5   |                                     |       |                                     |       | 100               | 109.95             |
| Wk 6   | 584                                 | 41.7  | 407                                 | 29.1  | 6,900             | 94.2               |
| Wk 7   |                                     |       |                                     |       | 38,730            | 14.66              |
| Wk 8   | 584                                 | 39    | 543                                 | 36.2  | 2,100             | 16.4               |
| Wk 9   |                                     |       |                                     |       | 70                | 17.21              |
| Wk 10  | 637                                 | 39.8  | 491                                 | 30.7  | <20D              | 31.2               |
| Wk 11  |                                     |       |                                     |       | <20D              | 13.81              |
| Wk 12  | 732                                 | 38.5  | 587                                 | 30.9  | 30                | 14.07              |
| Wk 14  | 725                                 | 40.3  | 535                                 | 29.7  | 40                | 13.58              |
| Wk 24  |                                     |       |                                     |       | <20ND             | 1.66               |
| Wk 36  | 799                                 | 47    | 488                                 | 28.7  | <20ND             | <0.50              |

| 707    | CD4 abs<br>(cells/mm <sup>3</sup> ) | CD4 % | CD8 abs<br>(cells/mm <sup>3</sup> ) | CD8 % | VL<br>(copies/ml) | 3BNC117<br>(ug/ml) |
|--------|-------------------------------------|-------|-------------------------------------|-------|-------------------|--------------------|
| Screen | 958                                 | 36    | 1167                                | 45    | <20ND             |                    |
| Day 0  | 779                                 | 35.4  | 1005                                | 45.7  | <20ND             | 0                  |
| Day 1  |                                     |       |                                     |       |                   | 171.4              |
| Wk 1   |                                     |       |                                     |       | <20ND             | 83.5               |
| Wk 2   | 923                                 | 34.2  | 1239                                | 45.9  | <20ND             | 49.55              |
| Wk 3   | 804                                 | 38.3  | 916                                 | 43.6  | <20ND             | 35.15              |
| Day 22 |                                     |       |                                     |       |                   | 167.3              |
| Wk 4   | 883                                 | 35.3  | 1133                                | 45.3  | <20ND             | 102.85             |
| Wk 5   |                                     |       |                                     |       | <20ND             | 76.1               |
| Wk 6   | 864                                 | 32    | 1310                                | 48.5  | <20ND             | 53.3               |
| Wk 7   |                                     |       |                                     |       | <20D              | 54.8               |
| Wk 8   | 815                                 | 30.2  | 1307                                | 48.4  | 50                | 39.2               |
| Wk 9   |                                     |       |                                     |       | 1,140             | 18.26              |
| Wk 10  | 644                                 | 32.2  | 984                                 | 49.2  | 4,060             | 17.42              |
| Wk 11  |                                     |       |                                     |       | 20                | 13.00              |
| Wk 12  | 818                                 | 30.3  | 1377                                | 51    | <20D              | 8.94               |
| Wk 14  | 896                                 | 30.9  | 1433                                | 49.3  | <20ND             | 5.91               |
| Wk 24  |                                     |       |                                     |       | <20ND             | 0.90               |
| Wk 36  | 718                                 | 34.2  | 1010                                | 48.1  | <20ND             | <0.50              |

| 708    | CD4 abs<br>(cells/mm <sup>3</sup> ) | CD4 % | CD8 abs<br>(cells/mm <sup>3</sup> ) | CD8 % | VL<br>(copies/ml) | 3BNC117<br>(ug/ml) |
|--------|-------------------------------------|-------|-------------------------------------|-------|-------------------|--------------------|
| Screen | 990                                 | 45    | 796                                 | 36    | <20ND             |                    |
| Day 0  | 958                                 | 45.6  | 767                                 | 36.5  | <20D              | 0                  |
| Day 1  |                                     |       |                                     |       |                   | 181.1              |
| Wk 1   |                                     |       |                                     |       | <20ND             | 96.9               |
| Wk 2   | 760                                 | 42.2  | 657                                 | 36.5  | <20ND             | 53.9               |
| Wk 3   | 966                                 | 46    | 773                                 | 36.8  | <20ND             | 41                 |
| Day 22 |                                     |       |                                     |       |                   | 200.3              |
| Wk 4   | 887                                 | 46.7  | 654                                 | 34.4  | <20ND             | 118.75             |
| Wk 5   |                                     |       |                                     |       | <20ND             | 89                 |
| Wk 6   | 953                                 | 45.4  | 762                                 | 36.3  | <20ND             | 65.15              |
| Wk 7   |                                     |       |                                     |       | <20ND             | 57.45              |
| Wk 8   | 742                                 | 41.2  | 704                                 | 39.1  | 140               | 45.05              |
| Wk 9   |                                     |       |                                     |       | 4,920             | 16.44              |
| Wk 10  | 687                                 | 40.4  | 792                                 | 46.6  | 7,100             | 14.89              |
| Wk 11  |                                     |       |                                     |       | <20D              | 15.51              |
| Wk 12  | 682                                 | 37.9  | 837                                 | 46.5  | <20ND             | 15.48              |
| Wk 14  | 758                                 | 42.1  | 731                                 | 40.6  | <20D              | 7.32               |
| Wk 24  |                                     |       |                                     |       | <20D              | <0.50              |
| Wk 36  | 926                                 | 44.1  | 809                                 | 38.5  | <20ND             | <0.50              |

Supplementary Table 4 continued. Laboratory values for Study Participants.

| <b>b</b> | <b>709</b> | CD4 abs (cells/mm <sup>3</sup> ) | CD4 % | CD8 abs (cells/mm <sup>3</sup> ) | CD8 % | VL (copies/ml) | 3BNC117 (ug/ml) | <b>710</b> | CD4 abs (cells/mm <sup>3</sup> ) | CD4 % | CD8 abs (cells/mm <sup>3</sup> ) | CD8 % | VL (copies/ml) | 3BNC117 (ug/ml) |        |
|----------|------------|----------------------------------|-------|----------------------------------|-------|----------------|-----------------|------------|----------------------------------|-------|----------------------------------|-------|----------------|-----------------|--------|
| Screen   |            | 1095                             | 44    | 863                              | 35    | <20 ND         |                 | Screen     |                                  | 842   | 42                               | 838   | 42             | <20 ND          |        |
| Day 0    |            | 1031                             | 49.1  | 668                              | 31.8  | <20 ND         | 0               | Day 0      |                                  | 928   | 46.4                             | 796   | 39.8           | <20 ND          | 0      |
| Day 1    |            |                                  |       |                                  |       |                | 179.00          | Day 1      |                                  |       |                                  |       |                |                 |        |
| Wk 1     |            |                                  |       |                                  |       | <20 ND         | 79.30           | Wk 1       |                                  |       |                                  |       | <20 ND         | 76.60           |        |
| Wk 2     |            | 873                              | 49    | 644                              | 36    | <20 D          | 56.30           | Wk 2       |                                  | 842   | 42.1                             | 786   | 39.3           | <20 ND          | 71.65  |
| Day 15   |            |                                  |       |                                  |       |                | 189.20          | Day 15     |                                  |       |                                  |       |                |                 | 265.80 |
| Wk 3     |            |                                  |       |                                  |       | <20 ND         | 112.20          | Wk 3       |                                  |       |                                  |       | <20 ND         | 134.50          |        |
| Wk 4     |            | 1291                             | 44.5  | 1001                             | 34.5  | <20 D          | 137.15          | Wk 4       |                                  | 878   | 43.9                             | 802   | 40.1           | <20 ND          | 125.15 |
| Day 29   |            |                                  |       |                                  |       |                | 410.4           | Day 29     |                                  |       |                                  |       |                |                 | 332.2  |
| Wk 5     |            |                                  |       |                                  |       | 620            | 152.8           | Wk 5       |                                  |       |                                  |       | <20 ND         | 183.7           |        |
| Wk 6     |            | 958                              | 45.6  | 714                              | 34    | 870            | 163.25          | Wk 6       |                                  | 882   | 46.4                             | 713   | 37.5           | <20 D           | 163.3  |
| Day 43   |            |                                  |       |                                  |       |                |                 | Day 43     |                                  |       |                                  |       |                |                 | 403.2  |
| Wk 7     |            |                                  |       |                                  |       | 600            | 127.3           | Wk 7       |                                  |       |                                  |       | <20 ND         | 150.85          |        |
| Wk 8     |            | 1299                             | 48.1  | 861                              | 31.9  | 210            | 63.85           | Wk 8       |                                  | 871   | 36.3                             | 1142  | 47.6           | <20 ND          | 203.85 |
| Wk 9     |            |                                  |       |                                  |       | 130            | 18.27           | Wk 9       |                                  |       |                                  |       | <20 ND         | 16.64           |        |
| Wk 10    |            | 1175                             | 45.2  | 881                              | 33.9  | 40             | 19.77           | Wk 10      |                                  | 1046  | 43.6                             | 1032  | 43             | <20 ND          | 14.15  |
| Wk 11    |            |                                  |       |                                  |       | 70             | 20.33           | Wk 11      |                                  |       |                                  |       | <20 D          | 17.26           |        |
| Wk 12    |            | 1470                             | 42    | 1211                             | 34.6  | 170            | 16.6            | Wk 12      |                                  | 1156  | 42.8                             | 1150  | 42.6           | <20 ND          | 17.58  |
| Wk 13    |            |                                  |       |                                  |       | <20 D          |                 | Wk 13      |                                  |       |                                  |       | <20 ND         | 43.95           |        |
| Wk 14    |            | 1002                             | 47.7  | 716                              | 34.1  |                | 33.55           | Wk 14      |                                  | 767   | 36.5                             | 998   | 47.5           | <20 ND          |        |
| Wk 15    |            |                                  |       |                                  |       |                |                 | Wk 15      |                                  |       |                                  |       | <20 ND         |                 |        |
| Wk 16    |            |                                  |       |                                  |       |                |                 | Wk 16      |                                  | 435   | 29                               | 755   | 50.3           | 50              | 19.5   |
| Wk 17    |            |                                  |       |                                  |       |                |                 | Wk 17      |                                  |       |                                  |       | <20 D          |                 |        |
| Wk 18    |            |                                  |       |                                  |       |                |                 | Wk 18      |                                  | 1293  | 40.4                             | 1395  | 43.6           | 70              | 15.2   |
| Wk 19    |            |                                  |       |                                  |       |                |                 | Wk 19      |                                  |       |                                  |       | 610            | 13.69           |        |
| Wk 20    |            |                                  |       |                                  |       |                |                 | Wk 20      |                                  | 1064  | 38                               | 1210  | 43.2           | 1930            | 10.46  |
| Wk 22    |            |                                  |       |                                  |       |                |                 | Wk 22      |                                  |       |                                  |       | 20             | 5.98            |        |
| Wk 24    |            |                                  |       |                                  |       |                |                 | Wk 24      |                                  |       |                                  |       | <20 D          | 4.14            |        |

  

| <b>711</b> | CD4 abs (cells/mm <sup>3</sup> ) | CD4 % | CD8 abs (cells/mm <sup>3</sup> ) | CD8 % | VL (copies/ml) | 3BNC117 (ug/ml) | <b>712</b> | CD4 abs (cells/mm <sup>3</sup> ) | CD4 % | CD8 abs (cells/mm <sup>3</sup> ) | CD8 % | VL (copies/ml) | 3BNC117 (ug/ml) |        |        |
|------------|----------------------------------|-------|----------------------------------|-------|----------------|-----------------|------------|----------------------------------|-------|----------------------------------|-------|----------------|-----------------|--------|--------|
| Screen     |                                  | 1096  | 50                               | 605   | 28             | <20 D           |            | Screen                           |       | 626                              | 39.1  | 810            | 50.6            | <20 ND |        |
| Day 0      |                                  | 1000  | 47.6                             | 580   | 27.6           | <20 ND          | 0          | Day 0                            |       | 597                              | 39.8  | 741            | 49.4            | <20 ND | 1.64   |
| Day 1      |                                  |       |                                  |       |                |                 | 207.90     | Day 1                            |       |                                  |       |                |                 |        | 386.5  |
| Wk 1       |                                  |       |                                  |       |                | <20 D           | 84.60      | Wk 1                             |       |                                  |       |                | <20 ND          | 142.15 |        |
| Wk 2       |                                  | 1804  | 44                               | 1152  | 28             | <20 ND          | 46.55      | Wk 2                             |       | 584                              | 38.9  | 761            | 50.7            | <20 ND | 70.6   |
| Day 15     |                                  |       |                                  |       |                |                 | 159.80     | Day 15                           |       |                                  |       |                |                 |        | 584.11 |
| Wk 3       |                                  |       |                                  |       |                | 1870            | 92.90      | Wk 3                             |       |                                  |       |                | <20 ND          | 176.63 |        |
| Wk 4       |                                  | 472   | 36.3                             | 374   | 28.8           | 48,730          | 85.1       | Wk 4                             |       | 618                              | 38.6  | 843            | 52.7            | <20 ND | 108.65 |
| Day 29     |                                  |       |                                  |       |                |                 |            | Day 29                           |       |                                  |       |                |                 |        | 403.6  |
| Wk 5       |                                  |       |                                  |       |                | 7750            | 44         | Wk 5                             |       |                                  |       |                | <20 ND          | 266.5  |        |
| Wk 6       |                                  | 1290  | 40.3                             | 1203  | 37.6           | 16,580          |            | Wk 6                             |       | 553                              | 39.5  | 715            | 51.1            | <20 ND | 110.8  |
| Day 43     |                                  |       |                                  |       |                |                 |            | Day 43                           |       |                                  |       |                |                 |        | 572.4  |
| Wk 7       |                                  |       |                                  |       |                | 690             | 18.36      | Wk 7                             |       |                                  |       |                | <20 ND          |        |        |
| Wk 8       |                                  | 1210  | 44.8                             | 915   | 33.9           | 190             | 14.91      | Wk 8                             |       | 498                              | 38.3  | 684            | 52.6            | <20 ND | 11.67  |
| Wk 9       |                                  |       |                                  |       |                | 80              | 11.07      | Wk 9                             |       |                                  |       |                | <20 ND          | 11.57  |        |
| Wk 10      |                                  | 1294  | 46.2                             | 868   | 31             | <20 D           | 7.21       | Wk 10                            |       | 595                              | 37.2  | 835            | 52.2            | <20 ND | 15.77  |
| Wk 11      |                                  |       |                                  |       |                |                 |            | Wk 11                            |       |                                  |       |                | <20 ND          | 12.53  |        |
| Wk 12      |                                  | 1328  | 45.8                             | 754   | 26             | 30              | 2.85       | Wk 12                            |       | 688                              | 38.2  | 920            | 51.1            | <20D   | 13.55  |
| Wk 13      |                                  |       |                                  |       |                |                 |            | Wk 13                            |       |                                  |       |                | <20 ND          | 11.01  |        |
| Wk 14      |                                  | 739   | 46.2                             | 453   | 28.3           | <20 ND          | 2.26       | Wk 14                            |       | 551                              | 36.7  | 789            | 52.6            | 40     | 7.93   |
|            |                                  |       |                                  |       |                |                 |            | Wk 15                            |       |                                  |       |                | 120             | 5.92   |        |
|            |                                  |       |                                  |       |                |                 |            | Wk 16                            |       |                                  |       |                | 1,720           |        |        |
|            |                                  |       |                                  |       |                |                 |            | Wk 17                            |       |                                  |       |                | 24,280          |        |        |

  

| <b>713</b> | CD4 abs (cells/mm <sup>3</sup> ) | CD4 % | CD8 abs (cells/mm <sup>3</sup> ) | CD8 % | VL (copies/ml) | 3BNC117 (ug/ml) | <b>714</b> | CD4 abs (cells/mm <sup>3</sup> ) | CD4 % | CD8 abs (cells/mm <sup>3</sup> ) | CD8 % | VL (copies/ml) | 3BNC117 (ug/ml) |        |       |
|------------|----------------------------------|-------|----------------------------------|-------|----------------|-----------------|------------|----------------------------------|-------|----------------------------------|-------|----------------|-----------------|--------|-------|
| Screen     |                                  | 558   | 34.9                             | 531   | 33.2           | <20 ND          |            | Screen                           |       | 504                              | 32    | 640            | 40              | <20 ND |       |
| Day 0      |                                  | 358   | 32.5                             | 404   | 36.7           | <20 ND          | 1.57       | Day 0                            |       | 590                              | 36.9  | 619            | 38.7            | <20 ND | 0     |
| Day 1      |                                  |       |                                  |       |                |                 | 245.7      | Day 1                            |       |                                  |       |                |                 |        | 308.8 |
| Wk 1       |                                  |       |                                  |       |                | <20 ND          | 99.65      | Wk 1                             |       |                                  |       |                | <20 ND          | 99.65  |       |
| Wk 2       |                                  | 488   | 37.5                             | 490   | 37.7           | <20 ND          | 19.69      | Wk 2                             |       | 578                              | 34    | 699            | 41.1            | <20 ND | 63.8  |
| Day 15     |                                  |       |                                  |       |                |                 | 263.86     | Day 15                           |       |                                  |       |                |                 |        | 338.8 |
| Wk 3       |                                  |       |                                  |       |                | <20 ND          | 88.1       | Wk 3                             |       |                                  |       |                | <20 ND          | 160.8  |       |
| Wk 4       |                                  | 401   | 33.4                             | 424   | 35.3           | <20 ND          | 96.05      | Wk 4                             |       | 579                              | 36.2  | 653            | 40.8            | <20 ND | 89    |
| Day 29     |                                  |       |                                  |       |                |                 | 395.6      | Day 29                           |       |                                  |       |                |                 |        | 263.2 |
| Wk 5       |                                  |       |                                  |       |                | 300             | 167.8      | Wk 5                             |       |                                  |       |                | <20 ND          | 161    |       |
| Wk 6       |                                  | 395   | 32.9                             | 426   | 35.5           | 6310            | 81.95      | Wk 6                             |       | 531                              | 37.9  | 553            | 39.5            | <20 ND | 87.4  |
| Day 43     |                                  |       |                                  |       |                |                 |            | Day 43                           |       |                                  |       |                |                 |        | 259.5 |
| Wk 7       |                                  |       |                                  |       |                | <20 ND          | 25.65      | Wk 7                             |       |                                  |       |                | <20 ND          | 130.6  |       |
| Wk 8       |                                  | 438   | 36.5                             | 452   | 37.7           | <20 ND          | 22.48      | Wk 8                             |       | 483                              | 30.2  | 584            | 36.5            | <20 D  | 80.2  |
| Wk 9       |                                  |       |                                  |       |                | <20 ND          | 14.28      | Wk 9                             |       |                                  |       |                | 180             | 66.25  |       |
| Wk 10      |                                  | 380   | 38                               | 354   | 35.4           | <20 ND          | 6.05       | Wk 10                            |       | 340                              | 28.3  | 426            | 35.5            | 8,150  | 46.55 |
| Wk 11      |                                  |       |                                  |       |                | <20 ND          | 4.86       | Wk 11                            |       |                                  |       |                | 39,920          | 30.89  |       |
| Wk 12      |                                  | 455   | 35                               | 486   | 37.4           | <20 ND          | 1.86       | Wk 12                            |       | 545                              | 28.7  | 836            | 44              | 300    | 25.72 |
| Wk 13      |                                  |       |                                  |       |                | <20 ND          |            |                                  |       |                                  |       |                |                 |        |       |
| Wk 14      |                                  | 484   | 34.6                             | 496   | 35.4           | <20 ND          | 1.23       |                                  |       |                                  |       |                |                 |        |       |

  

| <b>715</b> | CD4 abs (cells/mm <sup>3</sup> ) | CD4 % | CD8 abs (cells/mm <sup>3</sup> ) | CD8 % | VL (copies/ml) | 3BNC117 (ug/ml) |        |
|------------|----------------------------------|-------|----------------------------------|-------|----------------|-----------------|--------|
| Screen     |                                  | 673   | 35                               | 676   | 36             | <20 ND          |        |
| Day 0      |                                  | 667   | 35.1                             | 644   | 33.9           | <20 D           | 0.88   |
| Day 1      |                                  |       |                                  |       |                |                 | 228.21 |
| Wk 1       |                                  |       |                                  |       |                | <20 ND          | 96.72  |
| Wk 2       |                                  | 872   | 37.9                             | 743   | 32.3           | <20 ND          | 79.1   |
| Day 15     |                                  |       |                                  |       |                |                 | 275.6  |
| Wk 3       |                                  |       |                                  |       |                | <20 D           | 160.3  |
| Wk 4       |                                  | 616   | 32.4                             | 621   | 32.7           | <20 D           | 115.5  |
| Day 29     |                                  |       |                                  |       |                |                 | 356.6  |
| Wk 5       |                                  |       |                                  |       |                | <20 ND          | 221.2  |
| Wk 6       |                                  | 644   | 33.9                             | 623   | 32.8           | <20 ND          | 145.6  |
| Day 43     |                                  |       |                                  |       |                |                 | 396    |
| Wk 7       |                                  |       |                                  |       |                | <20 ND          | 178.8  |
| Wk 8       |                                  | 842   | 31.2                             | 913   | 33.8           | <20 ND          | 160.4  |
| Wk 9       |                                  |       |                                  |       |                | <20 ND          | 109.6  |
| Wk 10      |                                  | 695   | 33.1                             | 720   | 34.3           | <20 ND          | 90.25  |
| Wk 11      |                                  |       |                                  |       |                | 2,240           | 40.96  |
| Wk 12      |                                  | 636   | 30.3                             | 764   | 36.4           | 14,000          | 35.99  |
| Wk 13      |                                  |       |                                  |       |                | 2,470           |        |
| Wk 14      |                                  |       |                                  |       |                | 600             |        |

Supplementary Table 4 continued. Laboratory values for Study Participants.

**c**

| <b>705</b> | <b>CD4 abs<br/>(cells/mm<sup>3</sup>)</b> | <b>CD4 %</b> | <b>CD8 abs<br/>(cells/mm<sup>3</sup>)</b> | <b>CD8 %</b> | <b>VL<br/>(copies/ml)</b> | <b>3BNC117<br/>(ug/ml)</b> | <b>706</b> | <b>CD4 abs<br/>(cells/mm<sup>3</sup>)</b> | <b>CD4 %</b> | <b>CD8 abs<br/>(cells/mm<sup>3</sup>)</b> | <b>CD8 %</b> | <b>VL<br/>(copies/ml)</b> | <b>3BNC117<br/>(ug/ml)</b> |
|------------|-------------------------------------------|--------------|-------------------------------------------|--------------|---------------------------|----------------------------|------------|-------------------------------------------|--------------|-------------------------------------------|--------------|---------------------------|----------------------------|
| Screen     | 905                                       | 34           | 872                                       | 32           | <20                       |                            | Screen     | 504                                       | 19           | 1633                                      | 63           | 40                        |                            |
| Day 0      | 713                                       | 32.4         | 733                                       | 33.3         | 8730                      | <0.5                       | Day 0      | 592                                       | 26.9         | 1217                                      | 55.3         | 50                        | <0.5                       |
| Day 1      |                                           |              |                                           |              |                           | 393.2                      | Day 1      |                                           |              |                                           |              |                           | 264.3                      |
| Wk 1       |                                           |              |                                           |              |                           | 6140                       | Wk 1       |                                           |              |                                           |              | <20 D                     | 130.6                      |
| Wk 2       | 701                                       | 29.2         | 866                                       | 36.1         | 50,150                    | 61.9                       | Wk 2       | 420                                       | 20           | 1258                                      | 59.9         | 80                        | 66.15                      |
| Wk 3       |                                           |              |                                           |              |                           |                            | Wk 3       | 418                                       | 20.9         | 1114                                      | 55.7         | 110                       | 36.1                       |
| Day 22     |                                           |              |                                           |              |                           |                            | Day 22     |                                           |              |                                           |              |                           | 314.7                      |
| Wk 4       |                                           |              |                                           |              |                           |                            | Wk 4       | 386                                       | 22.7         | 1017                                      | 59.8         | 1060                      | 138.35                     |
| Wk 5       |                                           |              |                                           |              | 184,100                   | 17.5                       | Wk 5       |                                           |              |                                           |              | 4780                      | 91.4                       |
| Wk 6       |                                           |              |                                           |              |                           |                            | Wk 6       | 281                                       | 18.7         | 944                                       | 62.9         | 6970                      | 42.55                      |
| Wk 7       |                                           |              |                                           |              |                           |                            | Wk 7       |                                           |              |                                           |              | 130                       | 28.3                       |
| Wk 8       | 682                                       | 23.5         | 1520                                      | 52.4         | 115,590                   | 2.84                       | Wk 8       |                                           |              |                                           |              | <20 ND                    | 18.55                      |
| Wk 9       |                                           |              |                                           |              |                           |                            | Wk 9       |                                           |              |                                           |              | <20 D                     | 13.37                      |
| Wk 10      |                                           |              |                                           |              |                           |                            | Wk 10      | 387                                       | 17.6         | 1355                                      | 61.6         | <20 ND                    | 8.77                       |
| Wk 11      |                                           |              |                                           |              |                           |                            | Wk 11      |                                           |              |                                           |              | <20 ND                    | 6.5                        |
| Wk 12      | 848                                       | 21.2         | 1888                                      | 47.2         | 450                       |                            | Wk 12      | 442                                       | 22.1         | 1030                                      | 51.5         | <20 ND                    | 4.8                        |
| Wk 13      |                                           |              |                                           |              |                           |                            | Wk 13      |                                           |              |                                           |              |                           |                            |
| Wk 14      |                                           |              |                                           |              |                           |                            | Wk 14      | 520                                       | 20.8         | 1378                                      | 55.1         | <20 ND                    | 1.99                       |
| Wk 24      |                                           |              |                                           |              |                           |                            | Wk 24      |                                           |              |                                           |              |                           | <0.5                       |
| Wk 36      | 949                                       | 27.1         | 1407                                      | 40.2         |                           |                            | Wk 36      |                                           |              |                                           |              |                           | <0.5                       |

**Supplementary Table 4. Laboratory values for Study Participants.** Absolute CD4+ T cell counts (CD4 abs), CD4+ T cell per cent among CD3+T cells (CD4%), absolute CD8+ T cell counts (CD8 abs), CD8+ T cell per cent among CD3+T cells (CD8%), viral loads (VL) as well as 3BNC117 concentration in serum during the study period for each study participant in Group A (a), Group B (b) and two additional participants (c). The latter were excluded from further analysis as their viral levels were not <20 copies/ml at day 0. Participant 705 chose not to restart ART and therefore remained viraemic for several weeks. Blue shaded areas indicate time points after re-initiation of ART, green font indicates time points of 3BNC117 infusion; Wk-study week. <20ND-viral load below 20 copies/ml and undetected, <20D-viral load below 20copies/ml but detected.

Supplementary Table 5. Adverse events reported during study follow up in study groups A and B

| Group A                                                            |           |           |              |            |                           | Group B                                                                 |           |           |              |            |                           |
|--------------------------------------------------------------------|-----------|-----------|--------------|------------|---------------------------|-------------------------------------------------------------------------|-----------|-----------|--------------|------------|---------------------------|
| Adverse Events                                                     | No. AEs   | No. Mild  | No. Moderate | No. Severe | No. of participants (n=8) | Adverse Events                                                          | No. AEs   | No. Mild  | No. Moderate | No. Severe | No. of participants (n=7) |
| <b>Within 2 weeks of last infusion *</b>                           |           |           |              |            |                           | <b>Within 2 weeks of last infusion *</b>                                |           |           |              |            |                           |
| Anemia                                                             | 1         | 1         | -            | -          | 1                         | Asthma exacerbation #                                                   | 1         | -         | -            | 1          | 1                         |
| Chest tightness                                                    | 2         | 2         | -            | -          | 2                         | Diarrhea                                                                | 1         | 1         | -            | -          | 1                         |
| Headache                                                           | 2         | 2         | -            | -          | 2                         | Dizziness                                                               | 1         | 1         | -            | -          | 1                         |
| Hyperbilirubinemia †                                               | 1         | -         | -            | 1          | 1                         | Ear ache                                                                | 1         | 1         | -            | -          | 1                         |
| Low back pain                                                      | 1         | -         | 1            | -          | 1                         | Hyperhidrosis                                                           | 2         | 2         | -            | -          | 1                         |
| Muscle cramps                                                      | 2         | 2         | -            | -          | 2                         | Nausea                                                                  | 1         | 1         | -            | -          | 1                         |
| Paresthesia upper extremity                                        | 2         | 2         | -            | -          | 2                         | Pain at infusion site                                                   | 1         | 1         | -            | -          | 1                         |
| Skin abscess                                                       | 1         | -         | 1            | -          | 1                         | URI                                                                     | 4         | 3         | 1            | -          | 4                         |
| Upper respiratory tract infection                                  | 3         | 3         | -            | -          | 3                         | <b>Total reported AEs</b>                                               | <b>12</b> | <b>10</b> | <b>1</b>     | <b>1</b>   | <b>5</b>                  |
| <b>Total reported AEs</b>                                          | <b>15</b> | <b>12</b> | <b>2</b>     | <b>1</b>   | <b>5</b>                  | <b>Follow up period - 8 to 14 weeks after first 3BNC117 infusion **</b> |           |           |              |            |                           |
| <b>Follow up period - 36 weeks after first 3BNC117 infusion **</b> |           |           |              |            |                           | <b>Follow up period - 8 to 14 weeks after first 3BNC117 infusion **</b> |           |           |              |            |                           |
| <i>Related to 3BNC117</i>                                          |           |           |              |            |                           | <i>Related to 3BNC117</i>                                               |           |           |              |            |                           |
| Chest tightness                                                    | 2         | 2         | -            | -          | 2                         | Diarrhea                                                                | 1         | 1         | -            | -          | 1                         |
| Chills                                                             | 1         | 1         | -            | -          | 1                         | Hyperhidrosis                                                           | 2         | 2         | -            | -          | 1                         |
| Feverishness                                                       | 2         | 1         | 1            | -          | 2                         | Nausea                                                                  | 1         | 1         | -            | -          | 1                         |
| Headache                                                           | 7         | 4         | 3            | -          | 6                         | Pain at infusion site                                                   | 1         | 1         | -            | -          | 1                         |
| Malaise/fatigue                                                    | 1         | 1         | -            | -          | 1                         | URI                                                                     | 2         | 2         | -            | -          | 2                         |
| Paresthesia upper extremity                                        | 3         | 3         | -            | -          | 3                         | <b>Any related AE</b>                                                   | <b>7</b>  | <b>7</b>  | <b>0</b>     | <b>0</b>   | <b>5</b>                  |
| Restlessness                                                       | 1         | 1         | -            | -          | 1                         | <i>Not related to 3BNC117</i>                                           |           |           |              |            |                           |
| Upper respiratory tract infection                                  | 2         | 2         | -            | -          | 2                         | Asthma exacerbation #                                                   | 1         | -         | -            | 1          | 1                         |
| <b>Any related AE</b>                                              | <b>19</b> | <b>15</b> | <b>4</b>     | <b>0</b>   | <b>6</b>                  | Bacterial pneumonia #                                                   | 1         | -         | -            | 1          | 1                         |
| <i>Not related to 3BNC117</i>                                      |           |           |              |            |                           | Back pain                                                               | 1         | 1         | -            | -          | 1                         |
| Anal dysplasia                                                     | 1         | 1         | -            | -          | 1                         | Dizziness                                                               | 1         | 1         | -            | -          | 1                         |
| Anemia                                                             | 1         | 1         | -            | -          | 1                         | Ear ache                                                                | 1         | 1         | -            | -          | 1                         |
| Arthralgia (mono-articular)                                        | 1         | 1         | -            | -          | 1                         | Feverishness                                                            | 1         | 1         | -            | -          | 1                         |
| Hyperbilirubinemia †                                               | 1         | -         | -            | 1          | 1                         | Headache                                                                | 2         | 2         | -            | -          | 2                         |
| Low back pain                                                      | 1         | -         | 1            | -          | 1                         | Transaminitis                                                           | 1         | 1         | -            | -          | 1                         |
| Muscle cramps                                                      | 2         | 2         | -            | -          | 2                         | Upper respiratory tract infection                                       | 5         | 5         | -            | -          | 4                         |
| Skin abscess                                                       | 1         | -         | 1            | -          | 1                         | <b>Any non-related AE</b>                                               | <b>14</b> | <b>12</b> | <b>0</b>     | <b>2</b>   | <b>6</b>                  |
| Syphilis                                                           | 1         | 1         | -            | -          | 1                         | <b>Total reported AEs</b>                                               | <b>21</b> | <b>19</b> | <b>0</b>     | <b>2</b>   | <b>6</b>                  |
| Upper respiratory tract infection                                  | 3         | 3         | -            | -          | 3                         |                                                                         |           |           |              |            |                           |
| <b>Any non-related AE</b>                                          | <b>12</b> | <b>9</b>  | <b>2</b>     | <b>1</b>   | <b>6</b>                  |                                                                         |           |           |              |            |                           |
| <b>Total reported AEs</b>                                          | <b>31</b> | <b>24</b> | <b>6</b>     | <b>1</b>   | <b>6</b>                  |                                                                         |           |           |              |            |                           |

\* Top panels list all reported adverse events (AE) within 2 weeks of last 3BNC117 infusion, and \*\* bottom panels list all reported (related or non-related) AE during the observation period in group A (left) and group B (right).

# Participant 710, who had history of asthma, developed an episode of asthma exacerbation that required treatment with systemic steroids, symptoms began 11 days after second 3BNC117. Two months later, he was admitted to the hospital with bacterial pneumonia, which required treatment with systemic antibiotics. Both events were of grade 3 severity and considered not related to 3BNC117.

† Participant 708's total and direct bilirubin levels increased to 2.3 mg/dl and 0.8 mg/dl, respectively, 1 week after the second 3BNC117 infusion. Transaminases remained within normal limits. The elevation in direct bilirubin was of grade 3 severity according to the DAIDS v2.0 Toxicity Grading Scale. Bilirubin levels normalized by the next measurement 4 weeks later.

Supplementary Table 6. ACTG Trial Participants undergoing ATI without antibody treatment.

| Subject ID | Source study | Age at ATI | Gender | Duration of ART (from first ART to ATI) (years) | Nadir CD4 cell count (categorized) | Pre-ATI CD4 | pre-ATI regimen     | NNRTI-based pre-ATI regimen | Weeks from ATI until VL >200cp/ml |
|------------|--------------|------------|--------|-------------------------------------------------|------------------------------------|-------------|---------------------|-----------------------------|-----------------------------------|
| 2          | A5197        | 42         | Male   | 1.2758                                          | 201 - 500                          | 821         | tdf ftc rtv atv     | No                          | 1.9                               |
| 11         | A371         | 33         | Male   | 1.2183                                          | > 500                              | 1713        | abc d4t 3tc rtv apv | No                          | 1.7                               |
| 12         | A371         | 36         | Male   | 1.2293                                          | > 500                              | 688         | abc d4t 3tc rtv apv | No                          | 1.7                               |
| 16         | A371         | 34         | Male   | 2.8693                                          | 201 - 500                          | 535         | abc d4t 3tc rtv apv | No                          | 3                                 |
| 19         | A371         | 38         | Male   | 1.1554                                          | 201 - 500                          | 919         | abc d4t 3tc rtv apv | No                          | 2                                 |
| 21         | A371         | 38         | Male   | 1.1718                                          | > 500                              | 748         | abc d4t 3tc rtv apv | No                          | 2.9                               |
| 22         | A371         | 31         | Male   | 1.0924                                          | 201 - 500                          | 582         | abc d4t 3tc rtv apv | No                          | 2.9                               |
| 23         | A371         | 31         | Male   | 1.0267                                          | > 500                              | 989         | abc d4t 3tc rtv apv | No                          | 2.9                               |
| 24         | A371         | 24         | Male   | 1.1499                                          | 201 - 500                          | 621         | abc d4t 3tc rtv apv | No                          | 1                                 |
| 27         | A371         | 38         | Male   | 1.1882                                          | 201 - 500                          | 773         | abc d4t 3tc rtv apv | No                          | 1                                 |
| 28         | A371         | 44         | Male   | 1.1253                                          | 201 - 500                          | 829         | abc d4t 3tc rtv apv | No                          | 1.9                               |
| 29         | A5024        | 35         | Male   | 5.4018                                          | 201 - 500                          | 689         | 3tc zdv idv         | No                          | 2.3                               |
| 31         | A371         | 36         | Male   | 1.1526                                          | 201 - 500                          | 1141        | abc d4t 3tc rtv apv | No                          | 3                                 |
| 32         | A371         | 37         | Male   | 1.9986                                          | 201 - 500                          | 951         | abc d4t 3tc rtv apv | No                          | 2.9                               |
| 33         | A371         | 41         | Male   | 1.3388                                          | > 500                              | 670         | abc 3tc rtv apv     | No                          | 5.7                               |
| 34         | A371         | 27         | Male   | 1.0349                                          | > 500                              | 979         | d4t ddi 3tc rtv apv | No                          | 2.6                               |
| 39         | A371         | 46         | Male   | 1.0075                                          | 201 - 500                          | 598         | abc d4t 3tc rtv apv | No                          | 4                                 |
| 44         | A371         | 47         | Male   | 1.0951                                          | 201 - 500                          | 759         | abc d4t 3tc rtv apv | No                          | 2                                 |
| 51         | A5197        | 43         | Male   | 7.2608                                          | 201 - 500                          | 1294        | d4t 3tc idv         | No                          | 2.3                               |
| 52         | A371         | 22         | Female | 1.0185                                          | 201 - 500                          | 509         | abc d4t 3tc rtv apv | No                          | 1.9                               |
| 57         | A371         | 20         | Male   | 1.0869                                          | 201 - 500                          | 784         | abc d4t 3tc rtv apv | No                          | 1.9                               |
| 58         | A371         | 35         | Male   | 1.2731                                          | 201 - 500                          | 610         | abc d4t 3tc rtv apv | No                          | 2.6                               |
| 59         | A371         | 43         | Male   | 1.0185                                          | > 500                              | 1439        | abc d4t 3tc rtv apv | No                          | 3.9                               |
| 60         | A371         | 41         | Male   | 1.0404                                          | > 500                              | 1179        | abc d4t 3tc rtv apv | No                          | 6                                 |
| 61         | A371         | 41         | Male   | 1.0021                                          | 201 - 500                          | 710         | abc d4t 3tc rtv apv | No                          | 1.9                               |
| 62         | A371         | 27         | Female | 1.0951                                          | 201 - 500                          | 719         | abc d4t 3tc rtv apv | No                          | 1                                 |
| 63         | A5068        | 47         | Male   | 5.3854                                          | > 500                              | 1667        | 3tc zdv nfv         | No                          | 4.6                               |
| 64         | A371         | 29         | Male   | 1.0431                                          | 201 - 500                          | 536         | abc d4t 3tc rtv apv | No                          | 2.6                               |
| 65         | A5068        | 49         | Male   | 8.9911                                          | 201 - 500                          | 852         | 3tc zdv idv rtv     | No                          | 2.9                               |
| 72         | A371         | 41         | Male   | 1.7413                                          | > 500                              | 846         | abc d4t 3tc rtv apv | No                          | 2.1                               |
| 84         | A5197        | 35         | Male   | 6.1136                                          | 201 - 500                          | 1270        | d4t ddi nfv         | No                          | 1.9                               |
| 88         | A371         | 41         | Male   | 1.0513                                          | > 500                              | 799         | abc d4t 3tc rtv apv | No                          | 3                                 |
| 89         | A371         | 19         | Male   | 1.0924                                          | > 500                              | 687         | abc d4t 3tc rtv apv | No                          | 2.9                               |
| 91         | A371         | 49         | Male   | 1.0897                                          | > 500                              | 890         | abc d4t 3tc rtv apv | No                          | 3                                 |
| 92         | A371         | 27         | Male   | 1.1718                                          | > 500                              | 814         | abc d4t 3tc rtv apv | No                          | 2.1                               |
| 94         | A371         | 44         | Male   | 1.0513                                          | > 500                              | 874         | d4t ddi 3tc rtv apv | No                          | 3.9                               |
| 95         | A371         | 40         | Male   | 1.2266                                          | 201 - 500                          | 1081        | abc d4t 3tc rtv apv | No                          | 1.9                               |
| 101        | A5024        | 42         | Male   | 8.4736                                          | 201 - 500                          | 775         | 3tc zdv rtv         | No                          | 2.3                               |
| 102        | A371         | 21         | Male   | 1.0021                                          | > 500                              | 759         | abc d4t 3tc rtv apv | No                          | 0.9                               |
| 104        | A371         | 44         | Male   | 1.013                                           | > 500                              | 821         | abc 3tc tdf nfv     | No                          | 1.9                               |
| 105        | A5197        | 44         | Male   | 4.0739                                          | 201 - 500                          | 673         | 3tc zdv tdf fpv     | No                          | 4                                 |
| 106        | A5197        | 47         | Male   | 9.0924                                          | > 500                              | 740         | 3tc zdv nfv         | No                          | 2.7                               |
| 107        | A5197        | 41         | Male   | 5.5387                                          | 201 - 500                          | 1330        | d4t 3tc atv         | No                          | 3                                 |
| 114        | A371         | 29         | Male   | 1.0185                                          | > 500                              | 1221        | abc d4t 3tc rtv apv | No                          | 1.9                               |
| 115        | A371         | 22         | Male   | 1.0212                                          | > 500                              | 1127        | abc d4t 3tc rtv apv | No                          | 1.9                               |
| 116        | A371         | 42         | Male   | 1.1006                                          | > 500                              | 844         | abc d4t 3tc rtv apv | No                          | 2.7                               |
| 123        | A371         | 48         | Male   | 1.065                                           | > 500                              | 1398        | 3tc tdf nfv         | No                          | 2.9                               |
| 124        | A371         | 41         | Male   | 1.0185                                          | > 500                              | 1285        | abc d4t 3tc rtv apv | No                          | 3.7                               |
| 127        | A371         | 40         | Male   | 1.0157                                          | > 500                              | 736         | abc d4t 3tc rtv apv | No                          | 2                                 |
| 128        | A371         | 48         | Male   | 1.013                                           | > 500                              | 981         | abc d4t 3tc rtv apv | No                          | 2.1                               |
| 134        | A371         | 38         | Male   | 1.0787                                          | 201 - 500                          | 552         | abc d4t 3tc rtv apv | No                          | 1.7                               |
| 139        | A371         | 39         | Male   | 1.1554                                          | > 500                              | 966         | abc d4t 3tc rtv apv | No                          | 1.9                               |

**Supplementary Table 6. ACTG Trial Participants undergoing ATI without antibody treatment.** 52 participants from ACTG trials who underwent ATI without antibody infusion<sup>9</sup>. Controls were selected based on similar inclusion criteria: Age 18-65, Plasma HIV-1 RNA < 50 copies/ml for at least 12 months before ATI while on combination ART, CD4 count at time of ATI >500 cells/ul, CD4 nadir >200 cells/ul, weekly viral load measurements at least until viral rebound occurred<sup>10,11</sup>. TDF/FTC (tenofovir disoproxil fumarate/emtricitabine), RTV-ritonavir, ATV-atazanavir, NFV-nelfinavir, ABC-abacavir, D4T-stavudine, 3TC-lamivudine, APV-amprenavir, ZDV/3TC (zidovudine/lamivudine), IDV-indinavir, DDI-didanosine, ABC/3TC-abacavir/lamivudine, TDF-tenofovir, FPV-fosamprenavir, ZDV-zidovudine.

## Supplementary Table 7. Statistical Analysis

### a Baseline Statistics

|                                       | Group       | Mean      | sd      | Unpaired Wilcoxon test |
|---------------------------------------|-------------|-----------|---------|------------------------|
| Age                                   | ACTG        | 37.250    | 8.184   |                        |
|                                       | Group A + B | 38.385    | 12.101  | 0.9803                 |
|                                       | Group A     | 41.833    | 13.348  | 0.3844                 |
|                                       | Group B     | 35.429    | 11.058  | 0.3979                 |
|                                       | Group       | Mean      | sd      | Unpaired Wilcoxon test |
| Years on ART                          | ACTG        | 2.134     | 2.250   |                        |
|                                       | Group A + B | 7.308     | 5.950   | 0.0895                 |
|                                       | Group A     | 11.000    | 5.657   | 0.0004                 |
|                                       | Group B     | 4.143     | 4.337   | 0.4185                 |
|                                       | Group       | Mean      | sd      | Unpaired Wilcoxon test |
| Day 0 CD4<br>(cells/mm <sup>3</sup> ) | ACTG        | 899.481   | 285.988 |                        |
|                                       | Group A + B | 747.385   | 192.356 | 0.1192                 |
|                                       | Group A     | 757.500   | 110.502 | 0.2722                 |
|                                       | Group B     | 738.714   | 252.262 | 0.2273                 |
|                                       | Group       | Female    | Male    | Fisher's Exact test    |
| Gender                                | ACTG        | 2         | 50      |                        |
|                                       | Group A + B | 1         | 12      | 0.4940                 |
|                                       | Group A     | 0         | 6       | 1.0000                 |
|                                       | Group B     | 1         | 6       | 0.3202                 |
|                                       | Group       | 201 - 500 | > 500   | Fisher's Exact test    |
| CD4 Nadir<br>(cells/mm <sup>3</sup> ) | ACTG        | 26        | 26      |                        |
|                                       | Group A + B | 11        | 2       | 0.0302                 |
|                                       | Group A     | 6         | 0       | 0.0281                 |
|                                       | Group B     | 5         | 2       | 0.4281                 |

### b Confounder Analysis

| Case vs Control     | Age    | Years on ART | Gender | CD4 Nadir | Day 0 CD4 |
|---------------------|--------|--------------|--------|-----------|-----------|
| Group A vs ACTG     | 0.0008 | < 1e-04      | 0.0524 | 0.8850    | 0.5770    |
| Group B vs ACTG     | 0.0679 | 0.0590       | 0.7040 | 0.7502    | 0.8677    |
| Group A + B vs ACTG | 0.0252 | 0.0007       | 0.8931 | 0.2323    | 0.6192    |

### c Effect of bNAb Treatment on Rebound Delay

| Case vs Control     | Likelihood ratio test | (Weighted) log rank test |
|---------------------|-----------------------|--------------------------|
| Group A vs ACTG     | < 1e-04               | < 1e-05                  |
| Group B vs ACTG     | < 1e-08               | < 1e-04 *                |
| Group A + B vs ACTG | < 1e-11               | < 1e-05                  |

**Supplementary Table 7. Statistical Analysis.** We compared the different treatment groups (Group A, Group B, Group A + B) with the control group (ACTG) regarding **a**, baseline statistics: We performed a two-sided Fisher's Exact test for categorical variables (gender and CD4 Nadir) and an unpaired Wilcoxon test (two-sided) for continuous variables (age, years on ART and CD4 count before ATI initiation). **b**, potential confounders of the treatment effect on rebound delay: We built univariate survival regression models for each potential confounder and compared those models to a null model using a likelihood ratio test. Rebound time was modeled using a log-normal distribution, which resulted in the best model fit as measured by Akaike Information Criterion (AIC) among several different distributions (see Extended Data Fig. 4). **c**, statistical significance of the treatment effect on rebound delay: To determine if there is a significant effect of the treatment on the rebound delay after adjusting for the discovered confounders, we performed a weighted log-rank test<sup>12</sup> where the variables of the log-rank statistic are re-weighted by estimated inverse probability weights of each sample, which are based on the discovered confounders (see Methods Statistical Analysis). For the comparison between Group B participants and the ACTG trial participants, no confounders were discovered. Thus, we performed a standard log-rank test in that setting (marked with a star). In addition, we built for each comparison group a multivariate survival regression model containing the treatment group label and the discovered confounders as predictors and compared this model to a model using only the confounders as predictors with a likelihood ratio test (LRT). Significant p-values at significance level  $\alpha = 0.05$  are shown in red.



Supplementary Table 8. Hamming distance calculations and Poisson Fitter values for rebound sequences.

First Time Point Plasma SGS

|     | Single rebound? | # SGS | Min HD | Mean HD | Max HD | p-value | p (no APOBEC) |
|-----|-----------------|-------|--------|---------|--------|---------|---------------|
| 701 | yes             | 9     | 0      | 2.72    | 7      | 0.3061  | 0.8172        |
| 702 | no              | 9     | 0      | 10.39   | 16     | N/A     | N/A           |
| 703 | no              | 15    | 0      | 38.82   | 71     | N/A     | N/A           |
| 704 | yes             | 16    | 0      | 0.98    | 4      | 0.9095  | 0.8235        |
| 707 | yes             | 12    | 0      | 1.33    | 4      | 0.8175  | 0.8175        |
| 708 | yes             | 11    | 0      | 0.73    | 2      | 0.4264  | 0.4264        |
| 709 | no*             | 7     | 0      | 0.29    | 1      | n.d.*   | n.d.*         |

\*second lineage detected at W006

**Supplementary Table 8. Hamming distance calculations and Poisson Fitter values for rebound sequences.** Poisson Fitter v2<sup>13</sup> was applied as described in Methods. Reported are: participant ID, number of plasma-derived single genome sequences (SGSs) from the first time point post-rebound used in the calculation, minimum/mean/maximum pairwise Hamming distances, and two p goodness of fit values (described in Methods, with and without APOBEC sites included). Participants were designated as having a single rebound virus if (i) sequences from the first time point exhibited a star-like phylogeny, (ii) sequences from the first time point yielded a nonsignificant p goodness of fit value, demonstrating a Poisson distribution of Hamming distances, and (iii) all sequences from the second time point fell within the same, monophyletic lineage. Viral sequences from participant 709 fit criteria (i) and (ii), but not (iii) (Extended Data Figs. 7 and 8).



Supplementary Table 9. SGS Derived Pseudovirus Neutralization.

| Donor | Timepoint | Sample source | Sample name                   | 3BNC117 |        |     |
|-------|-----------|---------------|-------------------------------|---------|--------|-----|
|       |           |               |                               | IC50    | IC80   | MPI |
| 701   | Day 0     | Culture       | 701A-cul-d0-06-26-G4_S16      | 0.011   | 0.041  | 100 |
| 701   | Day 0     | Culture       | 701B-cul-d0-06-19-A10_S92     | 0.010   | 0.034  | 100 |
| 701   | Week 6    | Plasma        | 701-W6-P-06-12-C11_S5         | 0.015   | 1.123  | 89  |
| 701   | Week 6    | Plasma        | 701-W6-P-06-12-C7_S4          | 5.344   | >25    | 54  |
| 701   | Week 7    | Plasma        | <b>701-W7-P-06-12-B3_S96</b>  | 0.019   | 0.504  | 89  |
| 701   | Week 7    | Plasma        | 701-W7-P-06-12-A2_S93         | >25     | >25    | 43  |
| 702   | Day 0     | Culture       | 702-cul-d0-06-19-F7_S91       | 0.041   | 0.205  | 100 |
| 702   | Day 0     | Culture       | 702-cul-d0-06-29-A3_S36       | 0.032   | 0.154  | 100 |
| 702   | Week 5    | Plasma        | 702-W5-P-06-12-C7_S18         | 0.111   | 0.794  | 100 |
| 702   | Week 5    | Plasma        | 702-W5-P-06-12-E2_S21         | 0.161   | 0.772  | 100 |
| 702   | Week 6    | Plasma        | <b>702-W6-P-06-12-C3_S36</b>  | 2.453   | >25    | 75  |
| 702   | Week 6    | Plasma        | 702-W6-P-06-12-H11_S63        | 0.079   | 0.396  | 100 |
| 703   | Week 5    | Plasma        | 703-W5-P-06-12-D5_S84         | 0.030   | 0.140  | 99  |
| 703   | Week 5    | Plasma        | 703-W5-P-06-12-H1_S90         | 0.107   | 0.586  | 100 |
| 703   | Week 6    | Plasma        | 703-W6-P-06-12-D7_S66         | 0.018   | 0.166  | 100 |
| 703   | Week 6    | Plasma        | <b>703-W6-P-06-12-D10_S67</b> | 2.971   | >25    | 73  |
| 704   | Day 0     | Culture       | 704-cul-d0-06-26-D1_S27       | 0.040   | 0.182  | 98  |
| 704   | Week 5    | Plasma        | <b>704-W5-P-06-19-A3_S59</b>  | 0.292   | 1.791  | 85  |
| 704   | Week 6    | Plasma        | 704-W6-P-06-19-E11_S80        | 0.257   | >25    | 79  |
| 704   | Week 6    | Plasma        | 704-W6-P-06-19-G11_S87        | 0.127   | 0.740  | 94  |
| 707   | Day 0     | Culture       | 707-d0A-F10_S45               | 0.106   | 0.823  | 96  |
| 707   | Day 0     | Culture       | 707-d0A-CX-E3_S14             | 0.132   | 0.736  | 98  |
| 707   | Week 9    | Plasma        | <b>707-W9-P-B6_S13</b>        | 0.087   | 0.370  | 96  |
| 707   | Week 9    | Plasma        | 707-W9tit-P-C5_S91            | 0.087   | 1.051  | 90  |
| 707   | Week 10   | Plasma        | 707-W10-P-F5_S52              | 0.107   | 0.942  | 95  |
| 708   | Day 0     | Culture       | 708-d0B-CX-B1_S26             | 0.006   | 0.034  | 99  |
| 708   | Day 0     | Culture       | 708-d0B-CX-F10_S74            | 0.014   | 0.057  | 99  |
| 708   | Week 9    | Plasma        | <b>708-W9-P-H10_S81</b>       | 0.391   | >25    | 61  |
| 709   | Screen    | Culture       | 709 prescreen E5              | 0.106   | 0.316  | 100 |
| 709   | Week 5    | Plasma        | <b>709-W5-P-A8_S5</b>         | 0.748   | 3.432  | 97  |
| 709   | Week 6    | Plasma        | 709-W6-P-D5_S19               | 0.374   | 13.312 | 83  |

**Supplementary Table 9. SGS Derived Pseudovirus Neutralization.** SGS-derived pseudoviruses were tested for neutralization by 3BNC117. The SGS sequences from which these pseudoviruses were made are listed (Supplementary Fig. 2). Bold, red samples reflect the predominant genotype at rebound for each participant (Fig. 4b and Extended Data Figs. 7 and 8). Neutralization is indicated by IC50, IC80 and the maximum percent inhibition (MPI) achieved when 3BNC117 was tested up to 25 µg/ml against each virus. Color indicates antibody titer (low to high, red to green). Viruses not reaching 99% inhibition are shaded in gray.

- 1 Kearsse, M. *et al.* Geneious Basic: an integrated and extendable desktop software platform for the organization and analysis of sequence data. *Bioinformatics* **28**, 1647-1649, doi:10.1093/bioinformatics/bts199 (2012).
- 2 Zhou, T. *et al.* Structural basis for broad and potent neutralization of HIV-1 by antibody VRC01. *Science* **329**, 811-817, doi:science.1192819 [pii] 10.1126/science.1192819 (2010).
- 3 Lyumkis, D. *et al.* Cryo-EM structure of a fully glycosylated soluble cleaved HIV-1 envelope trimer. *Science* **342**, 1484-1490, doi:10.1126/science.1245627 (2013).
- 4 Scheid, J. F. *et al.* Sequence and Structural Convergence of Broad and Potent HIV Antibodies That Mimic CD4 Binding. *Science*, doi:science.1207227 [pii] 10.1126/science.1207227 (2011).
- 5 Mouquet, H. *et al.* Complex-type N-glycan recognition by potent broadly neutralizing HIV antibodies. *Proceedings of the National Academy of Sciences of the United States of America* **109**, E3268-3277, doi:10.1073/pnas.1217207109 (2012).
- 6 Walker, L. M. *et al.* Broad and potent neutralizing antibodies from an African donor reveal a new HIV-1 vaccine target. *Science* **326**, 285-289, doi:1178746 [pii] 10.1126/science.1178746 (2009).
- 7 Scharf, L. *et al.* Antibody 8ANC195 reveals a site of broad vulnerability on the HIV-1 envelope spike. *Cell reports* **7**, 785-795, doi:10.1016/j.celrep.2014.04.001 (2014).
- 8 Wu, X. *et al.* Rational design of envelope identifies broadly neutralizing human monoclonal antibodies to HIV-1. *Science* **329**, 856-861, doi:science.1187659 [pii] 10.1126/science.1187659 (2010).
- 9 Li, J. Z. *et al.* The size of the expressed HIV reservoir predicts timing of viral rebound after treatment interruption. *AIDS* **30**, 343-353, doi:10.1097/QAD.0000000000000953 (2016).
- 10 Volberding, P. *et al.* Antiretroviral therapy in acute and recent HIV infection: a prospective multicenter stratified trial of intentionally interrupted treatment. *AIDS* **23**, 1987-1995, doi:10.1097/QAD.0b013e32832eb285 (2009).
- 11 Rosenberg, E. S. *et al.* Safety and immunogenicity of therapeutic DNA vaccination in individuals treated with antiretroviral therapy during acute/early HIV-1 infection. *PloS one* **5**, e10555, doi:10.1371/journal.pone.0010555 (2010).
- 12 Xie, J. & Liu, C. Adjusted Kaplan-Meier estimator and log-rank test with inverse probability of treatment weighting for survival data. *Statistics in medicine* **24**, 3089-3110, doi:10.1002/sim.2174 (2005).
- 13 Giorgi, E. E. & Bhattacharya, T. A note on two-sample tests for comparing intra-individual genetic sequence diversity between populations. *Biometrics* **68**, 1323-1326; author reply 1326, doi:10.1111/j.1541-0420.2012.01775.x (2012).
